# Supplementary material
Source: PubMed Central journal article supplement (PMC8127811)
Supplement: 41586_2014_BFnature13992_MOESM124_ESM.pdf [file 41586_2014_BFnature13992_MOESM124_ESM.pdf]

This PDF file includes:

Materials and Methods

Supplementary Figures 1 to 22

Supplementary Tables 1, 2, 3, 9, 10, 14, 15, 20, 27, 29, 33.

References

**The following Supplementary Material for this manuscript is available at the mouse ENCODE portal website: <http://mouse.encodecc.org>)**

Supplementary Tables 4-8, 11-13, 16-19, 21-26, 28, 30-32.

## Table of contents

### Experimental Methods

- RNA-Seq from various production groups
- ChIP-Seq from various production groups
- DNase-Seq
- Replication Timing

### Data processing and integrative analysis

- Mapping of sequence reads from RNA-Seq experiments
- Generation of transcript contigs from RNA-Seq reads
- Processing of ChIP-Seq data
- Processing of DNase-Seq data
- Processing of Replication Timing data
- Prediction of candidate promoters/enhancers from chromatin profiles
- Annotation of orthologous protein-coding and non-coding genes
- Computation of RNA-Seq nucleotide coverage
- Analysis of splicing patterns
- Homology based prediction of the mouse lncRNA complement
- Neighborhood analysis of conserved co-expression (NACC)
- Chromatin state analysis
- Identification of orthologous cis regulatory elements in human and mouse genomes
- Identification of lineage specific cis-regulatory elements
- NACC analysis of predicted promoter and enhancers
- SOM analysis

### Supplementary figures:

Supplementary Figure 1: Functional validation of the candidate promoters and enhancers by a high throughput reporter assay in the mouse ES cells and embryonic fibroblast cells.

Supplementary Figure 2: The genomic distribution of 7 chromatin states in each of the 15 mouse and 6 human tissues or cell types.

Supplementary Figure 3: Homology based identification of mouse lncRNA transcripts.  
Supplementary Figure 4: Principal component analysis of human and mouse RNA-seq datasets after normalization.  
Supplementary Figure 5: NACC analysis of biological replicates in mouse and human.  
Supplementary Figure 6: Simulations of ability of NACC to detect rapidly evolving genes in unmatched conditions.  
Supplementary Figure 7: Species specific and conserved GO categories are robust to random condition sampling.  
Supplementary Figure 8: Species specific and conserved GO categories detected in matched samples.  
Supplementary Figure 9: Conservation of predicted mouse cis regulatory elements in the human genome.  
Supplementary Figure 10: Distribution of chromatin states around the orthologous genes in the human and mouse tissue and cell types.  
Supplementary Figure 11: Correlation matrix for the fraction of gene neighborhoods in the quiescent state among seven mouse cell lines and six human cell lines.  
Supplementary Figure 12: The genomic regions associated with the “quiescent” chromatin state are depleted of genes and are associated with low transcriptional activities.  
Supplementary Figure 13: Alignment of replication boundary positions across cell types.  
Supplementary Figure 14: Definitions and distributions of replication boundary classes.  
Supplementary Figure 15: Examples of conserved replication boundaries of each class of boundaries.  
Supplementary Figure 16: Mouse and human boundary comparisons and effect of domain consolidation during development.  
Supplementary Figure 17: Comparison of chromatin features to RT versus RT changes.  
Supplementary Figure 18: Comparison of Tophat and STAR mapping tools.  
Supplementary Figure 19: Comparison of DHS sites with TFBS in CH12 and MEL.  
Supplementary Figure 20: Median distance between candidate enhancers based histone modifications to nearest DHS sites.  
Supplementary Figure 21: Comparison between chromHMM states with candidate enhancers.  
Supplementary Figure 22: Analysis of conserved co-expression of gene pairs in the human and mouse genomes.

### Supplementary tables:

Supplementary Table 1: Experimental datasets used in the current study.  
Supplementary Table 2: Summary of the genomic experiments conducted in this study.  
Supplementary Table 3: Detailed list of the genomic experiments conducted in this study.  
Supplementary Table 4: List of 436,410 transcript contigs identified from 25 mouse tissue/cell types.  
Supplementary Table 5: List of the DNase hypersensitive sites (DHS) identified in the mouse genome.  
Supplementary Table 6: List of 280,396 TF binding sites identified in the mouse genome.  
Supplementary Table 7: List of 82,853 candidate promoters predicted in the current study.  
Supplementary Table 8: List of 291,200 candidate enhancers predicted in the current study.  
Supplementary Table 9: List of 76 predicted promoters tested by reporter assay.  
Supplementary Table 10: List of 183 predicted enhancers tested in a high throughput reporter assay.

Supplementary Table 11: List of chromatin states identified in the 15 mouse tissues and cell types and six human cell lines.

Supplementary Table 12: List of replication timing profiles for 11 mouse and 9 human cell types.

Supplementary Table 13: List of human and mouse orthologous gene pairs (MIT and Ensembl)

Supplementary Table 14: Summary of the 1:1 and many to 1 human/mouse orthologous genes.

Supplementary Table 15: GO categories for 1:many human/mouse orthologous genes.

Supplementary Table 16: List of the 151,257 orthologous exon in the mouse genome.

Supplementary Table 17: List of the 204,887 orthologous splice junction pairs in the mouse genome.

Supplementary Table 18: List of the 2,717 (3,446) novel human(mouse) exons.

Supplementary Table 19: List of the 2,327 human transcripts (corresponding to 1,679 genes) homologous to 5,067 putative mouse transcripts

Supplementary Table 20: RNA-seq datasets used for PCA analysis.

Supplementary Table 21: Complete list of all GO categories for analysis of conservation of gene expression programs.

Supplementary Table 22: List of the 164,428 candidate mouse enhancers with homologous sequences in the human genome.

Supplementary Table 23: List of the 51,661 candidate mouse promoters with homologous sequences in the human genome.

Supplementary Table 24: List of 918,002 DHS sites with homologous sequences in the human genome.

Supplementary Table 25: List of 149,521 TF binding sites with homologous sequences in the human genome.

Supplementary Table 26: List of 12,387 predicted mouse-specific promoters.

Supplementary Table 27: List of the predicted mouse-specific predicted promoters tested in reporter assay.

Supplementary Table 28: List of 48,245 predicted mouse-specific enhancers.

Supplementary Table 29: List of the predicted mouse-specific enhancers tested in reporter assays performed with the mouse and human cells.

Supplementary Table 30. List of mouse-specific TF binding sites.

Supplementary Table 31: Predicted orthologous promoters in the mouse and human genomes.

Supplementary Table 32: Predicted orthologous enhancers in the mouse and human genomes.

Supplementary Table 33: List of suspicious 1:1 human/mouse orthologous genes with manual curation.

## Materials and Methods

### RNA-Seq assays

#### RNA-Seq assays performed in the Gingeras group:

*Mouse Tissue Acquisition:* C57Bl/6 mice were used for all tissue resections. The following tissues were taken from 8-week old littermates: Adrenal, Duodenum, Stomach, Genital Fat Pad, Subcutaneous Fat Pad, Large Intestine, Small Intestine, Ovary, Testis, Spleen, Colon, Lung, Heart, Kidney, Liver, Thymus, Mammary Gland, Placenta (from pregnant mice), Cortex, Frontal Lobe, Cerebellum, Bladder, Liver. Central nervous system (CNS) taken from stage E11.5 littermates. Central nervous system (CNS) and liver were taken from E14 littermates. Liver, Limb and Whole Brain were taken from E14.5 littermates. Central nervous system (CNS) and liver were taken from E18 littermates.

*Human Cell Culture and RNA Isolation:* Cells were grown according the ENCODE cell culture standards. RNA was prepared as was described<sup>0</sup>

*Library Construction:* We generated directional (stranded) libraries for Paired End (PE) sequencing on the Illumina platform as described in <sup>2</sup> and as was also used in <sup>1</sup>, to generate the human ENCODE data. Briefly, 100 ng of Ribominus, (Invitrogen Inc.) treated PolyA(+) RNA with length > 200 nt were mixed with 2 ng of exogenous RNA spike-in, pool 14<sup>3</sup>. A mixture of random hexamers and oligo-dT<sub>21</sub> were used to prime the reverse transcriptase reaction. Entry sites for second strand synthesis catalyzed by E. coli DNA Polymerase are generated through RNase H nicks of the DNA:RNA duplex. dTTP is replaced with dUTP during the second strand synthesis. The (ds)cDNA is then sheared using sonification (Covaris). Staggered ends generated during shearing, are repaired and adenylated to prime them for adapter ligation with Illumina Y-adapters. The second strand containing dUTP is eliminated using UNG digestion. The resulting (ss)cDNA is run on an agarose gel and bands with the desired insert sizes of ~ 200 nt are cut out. Cluster compatible sequences are appended in an 18-cycle PCR reaction and the final library is gel purified. All libraries from biological replicates (littermates) were prepared in parallel to minimize day-to-day variation in the experimental procedure. Finally, the libraries were sequenced on the Illumina GAIIX or Hi-Seq platform to an average depth of ~100 million mate pairs per sample. The human ENCODE RNA-Seq data is at GEO: GSE30567. The mouse ENCODE RNA-Seq data is at GEO: GSE36025.

#### RNA-Seq assays performed in the Snyder group

Total RNA was extracted from cells grown under the same conditions as described for ChIP-seq (below) after indicated time stimulation with TNF-alpha or without stimulation, respectively, using RNeasy kit (Qiagen) according to the manufacturer's instructions.

*Strand-specific RNA-seq:* Total RNA was extracted using RNeasy kit (Qiagen) according to the manufacturer's instructions. Ribo-Zero™ Magnetic Gold Kit (Epicentre Cat # MRZG126, Madison, WI) was used to deplete ribosomal RNA. The isolated RNA was then sheared using the RNA Fragmentation Reagents (Life Technologies, Grand Island, NY, USA) at 80 °C for 1 min. The RNA fragment size range was mainly 100~500 bp on 2% E-gel (Invitrogen Cat # G4020-02, Carlsbad, CA). Doublestranded cDNA synthesis was primed with random hexamers and ds cDNA Kit (Invitrogen, Cat # 11917-010, Carlsbad, CA) following the manufacturer's instruction with some modification. Briefly, after First-Strand cDNA synthesis, NucAway Spin Column (Life Technologies, Grand Island, NY, USA) was used to remove dNTP. Then during the second strand reaction, dUTP was incorporated instead of dTTP. The reaction then was



instruction with some modification. Briefly, after First-Strand cDNA synthesis, NucAway Spin Column (Life Technologies, Grand Island, NY, USA) was used to remove dNTP. Then during the second strand reaction, dUTP was incorporated instead of dTTP. The reaction then was purified with QIAquick PCR spin column (Qiagen, #28106, Valencia, CA). The cDNA libraries were constructed and sequenced as described previously<sup>1</sup>. Briefly, cDNA was end-repaired with the End-It kit from Epicentre (Cat# ER0720, Madison, WI). After treatment with Klenow fragment (NEB, Cat # M0212s, Ipswich, MA) and dATP Illumina adapters were ligated to the protruding 3'-A' base (LigaFast, Promega Cat # M8221, Madison, WI). Ligated product was size selected on 2% E-gel (Invitrogen) (250-300 bp). The dUTP-containing second strands were removed by incubating with Uracil-DNA Glycosylase (New England Biolabs, Ipswich, MA, USA), and the libraries were amplified with Illumina genomic DNA primers 1.1 and 2.1 at the following conditions: 98°C 30 sec, 15 cycles of (98°C 10 sec, 65°C 30 sec, 72°C 30 sec), 72°C 5 min. The final amplified libraries were further purified by agarose gel excision and extraction. The library was subjected to 101b paired-end sequencing using Illumina's HiSeq 2000 Sequencer.

#### RNA-Seq assays performed in the Ren group

RNA samples from mouse tissues and primary cells were extracted from Trizol® according to manufacturer's protocol (Invitrogen). polyA+RNA was purified with the Dynabeads mRNA purification kit (Invitrogen). The mRNA libraries were prepared for strand-specific sequencing as described previously<sup>2</sup>.

#### RNA-Seq assays performed in the Hardison group

Cells were grown according to the approved ENCODE cell culture protocols. Total RNA was extracted from 5-10 million cells using TRIzol reagent, followed by mRNA selection, fragmentation and cDNA synthesis, which were performed as described previously<sup>4</sup>. Double-stranded cDNA samples were processed for library construction for Illumina sequencing, using the Illumina ChIP-seq Sample Preparation Kit. Strand-specific libraries were generated in a similar manner, except for a couple of modifications described previously<sup>2</sup>. Briefly, instead of dTTP, dUTP was used during second-strand cDNA synthesis to label the second-strand cDNA. During library preparation, the dUTP-labeled cDNA was treated with Uracil N Glycosylase, prior to the PCR amplification step. This was done to remove uracil from the second-strand, following which the DNA was subjected to high heat to facilitate abasic scission of the second strand. Library quality and size were evaluated using the Agilent Bioanalyzer 2100 (Agilent Technologies, Santa Clara, CA), and libraries were quantified with Quant-iT dsDNA HS Assay Kit (Molecular Probes, Eugene OR), and qPCR. DNA libraries were sequenced on either the Illumina Genome Analyzer II sequencing system or the HiSeq 2000. Cluster generation and sequencing chemistry were performed using Illumina-supplied kits as appropriate. All samples were determined as biological replicates.

#### **ChIP-seq assays**

##### ChIP-Seq assays of transcription factors (Snyder group)

Biological replicates were grown in separate batches and at separate times. Briefly,  $5 \times 10^7$  cells were grown to a density of  $0.6-0.8 \times 10^6$ /mL, then treated with 25 ng/mL human recombinant TNF-alpha (eBioscience #14-8329, San Diego, CA) for 30 minutes, 60 minutes or

120 minutes at 37°C, 5% CO<sub>2</sub>. After stimulation, cells were cross-linked in 1% formaldehyde for 10 minutes at room temperature. Nuclear lysates were sonicated using a Branson 250 Sonifier (power setting 7, 100% duty cycle for 12 × 20-s intervals), such that the chromatin fragments ranged from 50-2000kb. Clarified lysates were divided in half and treated overnight at 4°C with 12 μg of either anti-NFκB p65 (C-20) rabbit polyclonal antibody (Santa Cruz Biotechnology sc-372, Santa Cruz, CA), anti-pol II (Covance MMS-126R, Princeton, NJ), Anti-pol II CTD repeat YSPTSPS (phospho S2) (Abcam ab5095, Cambridge, MA) (Pol II-s2) antibody or normal rabbit / mouse IgG (Santa Cruz Biotechnology Sc-2027, Santa Cruz, CA; Millipore #12-371, Billerica, MA). Protein-DNA complexes were captured on Protein A/G agarose beads (Millipore #16-156/16-266, Billerica, MA) and eluted in 1% SDS TE buffer at 65°C. Following cross-link reversal and purification, the ChIP DNA sequencing libraries were prepared according to Illumina DNA Sample Kit Instructions (Illumina Part # 0801–0303, San Diego, CA). Libraries were sequenced on an Illumina Genome Analyzer II.

### ChIP-Seq assays of transcription factors and chromatin modification marks (Ren group)

*Mouse Tissues and Cell Culture:* Adult bone marrow, cerebellum, cortex, heart, intestine, kidney, liver, lung, olfactory bulb, spleen, testis, brown adipocytes, and thymus were dissected from 8-week old male C57Bl/6 mice (Charles River). Placenta was extracted from C57Bl/6 pregnant mice. E14.5 brain, heart, limb and liver, and mouse embryonic fibroblast (MEF) cells were derived from E14.5 C57Bl/6 mouse embryos. Tissues were minced to fine pieces in PBS and fixed with 1% formaldehyde at room temperature for 20 minutes. For bone marrow derived macrophage, Murine BMDMs were generated by flushing bone marrow cells from the femurs and tibias of mice using a 27 1/2G syringe. These cells were cultured for 7 d in DMEM (Life Technologies, Rockville, MD) containing 10% FBS (Omega Scientific, Tarzana, CA), 1% penicillin/streptomycin (Life Technologies), and 10% conditioned media (CM) from L929 cells overexpressing M-CSF at a cell density of 250,000 cells/mL on 10cm tissue cultured treated dishes. CM was replaced on day 4 of differentiation and every 2 day thereafter. MEF cells were genotyped to select male MEF cells used for this study. Placenta was dissected from pregnant C57Bl/6 mice at E14.5. mESC lines E14 and Bruce4 were maintained on mitomycin C-inactivated MEF feeder layers in DME containing 15% fetal calf serum, leukemia inhibiting factor, penicillin/streptomycin, L-glutamine and non-essential amino acids. mESCs were passaged on 0.2% gelatin twice to deplete feeder cells before harvest for experiments. CH12 and MEL cells were obtained and grown according to standard ENCODE cell culture protocols<sup>5</sup>. All cultured cells were fixed with 1% formaldehyde at room temperature for 15 minutes.

ChIP-Seq was carried out as previously described<sup>6</sup> with 500 μg chromatin and 5 μg antibody with the following antibodies, H3K4me3 (Millipore 05-745), H3K4me2 (Abcam, ab32356), H3K4me1 (Abcam, ab8895), H3K9ac (Active Motif, AM39137), H3K9me3 (Abcam, ab8898), H3K27ac (Active Motif, 39133), H3K27me3 (Active Motif, AM39155), H3K36me3 (Abcam, ab9050), H3K79me2 (Active Motif, AM39143), polII (Covance, MMS-126R), CTCF (ref), and P300 (Santa Cruz, sc585). ChIP and input library preparation and sequencing procedures were carried out as described previously according to Illumina protocols with minor modifications (Illumina, San Diego, CA).

## ChIP-seq assays of transcription factors and chromatin modifications (Hardison Lab)

Cells were grown according to the approved ENCODE cell culture protocols. The chromatin immunoprecipitation followed published methods<sup>7</sup>. Information on antibodies used is available via the hyperlinks in the "Select subtracks" menu. Samples passing initial quality thresholds (enrichment and depletion for positive and negative controls - if available - by quantitative PCR of ChIP material) are processed for library construction for Illumina sequencing, using the ChIP-seq Sample Preparation Kit, or more recently the TruSeq ChIP Sample Prep Kit, purchased from Illumina. Starting with a 5-10 ng sample of ChIP DNA, DNA fragments were repaired to generate blunt ends and a single A nucleotide was added to each end. Double-stranded Illumina adaptors were ligated to the fragments, and the ligation products were amplified by 18 cycles of PCR. Amplified DNA products between 250-350 bp were gel purified. Library quality and size were evaluated using the Agilent Bioanalyzer 2100 (Agilent Technologies, Santa Clara, CA), and libraries were quantified with Quant-iT dsDNA HS Assay Kit (Molecular Probes, Eugene OR), and qPCR. DNA libraries were sequenced on either the Illumina Genome Analyzer II sequencing system or the HiSeq 2000. Cluster generation and sequencing chemistry were performed using Illumina-supplied kits as appropriate. All samples were determined as biological replicates.

## DNase-Seq assays (Stamatoyannopoulos group)

DNaseI hypersensitivity mapping including nuclei isolation, DNaseI treatment, DNaseI double-hit fragment purification, library construction, and sequencing was performed essentially as previously described<sup>8-12</sup>. Different handling protocols were specifically developed and utilized for the following classes of mouse cell/tissue samples; the detailed protocols can be found at the associated URLs:

- (i) Cultured mouse cell lines [http://www.mouseencode.org/media/protocols/data\\_assay/dnasei-mouse/Culturedcells\\_SOP\\_nuclei\\_DNase\\_crosslink\\_RNA\\_V1\\_mouse\\_dnase.pdf](http://www.mouseencode.org/media/protocols/data_assay/dnasei-mouse/Culturedcells_SOP_nuclei_DNase_crosslink_RNA_V1_mouse_dnase.pdf)
- (ii) Primary mouse immune cells (T cells, B cells)  
[http://www.mouseencode.org/media/protocols/data\\_assay/dnasei/03042011\\_mouse\\_Rudensky\\_V5.pdf](http://www.mouseencode.org/media/protocols/data_assay/dnasei/03042011_mouse_Rudensky_V5.pdf)
- (iii) Fresh mouse tissues  
[http://www.mouseencode.org/media/protocols/data\\_assay/dnasei/01122011\\_nuclei\\_isolation\\_mouse\\_tissue\\_V2.pdf](http://www.mouseencode.org/media/protocols/data_assay/dnasei/01122011_nuclei_isolation_mouse_tissue_V2.pdf)
- (iv) Frozen mouse tissues  
[http://www.mouseencode.org/media/protocols/data\\_assay/dnasei/06242011\\_nuclei\\_isolation\\_cryomouse\\_tissue-Dounce\\_V1.pdf](http://www.mouseencode.org/media/protocols/data_assay/dnasei/06242011_nuclei_isolation_cryomouse_tissue-Dounce_V1.pdf)

Conventional DHS data sets were sequenced to an average target depth of 30 million uniquely mapping 36bp reads. Data sets for genomic footprinting were sequenced to an average depth of 270 million uniquely mapping 36bp reads.

## Replication Timing analysis (Gilbert group)

Protocols for generating and quality control for Repli-chip profiles were performed as previously described<sup>13,14</sup>. CH12 and MEL cells were obtained and grown according to standard ENCODE cell culture protocols<sup>5</sup>. Cells were labeled with 100  $\mu$ M BrdU for 2 h, and BrdU-substituted DNA was extracted using anti-BrdU antibody and hybridized onto NimbleGen Mouse CGH

3x720K Whole-Genome Tiling Arrays (NimbleGen, 100718\_MM9\_WG\_CGH) according to the manufacturer's protocol. Human and mouse Repli-chip profiles are available at GEO (GSE45716; GSE18019; GSE20027), [www.ReplicationDomain.org](http://www.ReplicationDomain.org), and the UCSC genome browser.

### **Luciferase reporter assays for functional validation of candidate promoters**

Predicted promoter sequences randomly selected for validation are listed in Supplementary Table 9. A total of 75 previously unknown promoters were tested, including 25 mESC-specific promoters, 25 MEF-specific promoters and 25 found to be active in both mESCs and MEF. Half of these tested promoter candidates were associated with H3K4me3 signal only, while the other half were associated with both H3K4me3 and polII signals. All candidate promoters were tested in both orientations. Cloning and reporter assays were carried out as previously described<sup>15</sup>. For novel promoter sequences, we tested both orientations of the candidate sequences. Fragments were designated as active if their relative luciferase value was significantly higher than random genomic fragments (P value < 0.01).

### **A high throughput reporter assay for functional validation of the candidate enhancers**

The chromosome coordinates and primers of the tested genomic fragments are listed in Supplementary Table 10. To test the accuracy of enhancer predictions, we performed quantitative high throughput reporter assay<sup>16</sup> with 183 candidate mESC-specific enhancers and 30 negative control regions. Briefly, candidate enhancer regions (1kb) were first amplified from C57BL/6 mouse genomic DNA by PCR with high fidelity 2X KAPA PCR mix. The amplified enhancer sequences were pooled and randomly sonicated into fragments of 250-500bp and size selected on a 2% agarose gel. Tru-Seq adaptors were then ligated to purified enhancer fragments according standard Illumina library preparation procedure. The ligation products were then amplified by PCR with primers (Forward: GCC GTG TAA TTC TAG AAA TGA TAC GGC GAC CAC CGA GAT CTA CAC, and Reverse: CCG CCC CGA CTC TAG ACA AGC AGA AGA CGG CAT ACG AGC T), and purified by size selection on a 2% agarose gel. The purified PCR products were then cloned (Clontech In-fusion HD) into pGL3 promoter (Promega) vector that were linearized at XbaI site. The In-fusion cloning product was ethanol precipitated, dissolved in 10 ul H<sub>2</sub>O, and transformed with DH10B electrophorate competent cells (Life Technology) to form reporter library. The reporter library was prepared with Qiagen.

The reporter library was transfected into mESCs according to Amaxa nucleofactor protocol (program A-13). RNA and DNA were harvested 24 hours post transfection with Qiagen Allprep kit. The input DNA library was generated with Tru-Seq PCR primers. For RNA library, 1ug of total RNA was treated with DNaseI and subject to first strand synthesise with Invitrogen SuperscriptIII using a reporter-RNA specific primer (TGTATCTTATCATGTCTGCTCGAA). RNA-Seq library was made with Tru-Seq PCR primers with 1<sup>st</sup> strand DNA. Each PCR reaction was monitored so that minimal cycle number was used for library construction.

Both Input DNA and RNA-Seq library were sequenced on an Illumina Hi-Seq 2000 instrument, and the sequence reads were mapped to mm9 with bowtie. The relative enhancer activity was calculated as the log ratio of (RNA-Seq reads)/(DNA-Seq reads) for each candidate enhancers or negative region.

For each putative enhancer region, RPKM was calculated as the number of reads per kilobase of the enhancer region per million reads mapped, with a pseudocount of 0.05 RPKM. Negative controls sets were chosen based on the following criteria: 1) they are in the gene desert area, and 2) they don't exhibit any chromatin modification signals, TF binding sites or DHS sites. The median of the negative control is -0.95 and standard deviation is 0.51. For the tested enhancers, we decided to use median + 1.63SD (-0.119 RPKM) to determine whether an enhancer is tested positive or negative.

## **Data processing methods**

### **Mapping of RNA-seq reads:**

Gingeras group: STAR 1.9<sup>17</sup> was used to map the RNA-seq data to the reference mouse genome mm9. Up to 10 mismatches per paired alignment were allowed. Only alignments for reads mapping to 10 or fewer loci were reported. Annotations were not utilized for mapping the data.

Snyder group: RNA-seq reads were mapped by Tophat (version 1.3) to mouse mm9 reference genome and FPKM were calculated with cufflink by using ensembl genes as guided reference. Orthologous genes between human and mouse were normalized by quantile normalization and differentially expressed genes were calculated by using limma package on log transformed expression value .

Hardison group: FastQ files for the resulting sequence reads (single read and paired-end, directional and non-directional) were moved to a data library in Galaxy, and tools implemented in Galaxy were used for further processing via workflows<sup>18-20</sup>. Data processing was also performed on the CyberSTAR high-performance computing system at Penn State. The reads were mapped to the mouse genome (mm9 assembly) using the program TopHat<sup>21,22</sup>. Signal tracks were created using BEDtools<sup>23</sup> and SAMtools<sup>24</sup>.

Ren group: Raw reads were mapped in FASTQ format to the mouse genome (mm9) with TopHat software version 1.20<sup>35</sup><sup>22</sup>. The wig files for RNA-Seq data were generated by TopHat. We assigned expression value (FPKM) for each RefSeq gene with Cufflinks<sup>25</sup>. To normalize the gene expression levels between different tissues, we used the quantile normalization function in R.

To investigate whether different mapping tools might affect the results, we systematically performed comparison between two different mappers (STAR and Tophat) and found their results are consistent, with an average correlation 0.94. Please refer to Supplementary Fig. 18 for more details.

### **Contig assembly from RNA-Seq reads (Gingeras group)**

Transcript contigs were generated as described in<sup>1</sup>. Contigs are defined by collapsing the RNA-seq coverage signal from merged biological replicates. Each contig is quantified against individual replicates to enable non-parametric irreproducible discovery rate (npIDR) analysis<sup>17</sup>. Contigs are required to have non-zero signal in both replicates. Only uniquely mapping reads are used for building and quantifying contigs. Neighboring contigs are merged if the gap between them is smaller than 25 bases. Contigs are called in a strand-specific way. To eliminate possible artifacts of stranded library construction, contigs are required to have > 1/9 signal of the contigs



on the opposite strand. Each contig is quantified with: (1) BPKM (Bases per Kilobase per Million mapped bases) averaged between the replicates. (2) npIDR between the replicates. (3) The total number of mapped bases in the contig in both replicates (sum of wiggle track signal).

## ChIP-Seq data processing

### *Snyder Lab*

*Uniform pipeline:* We used a uniform processing pipeline to identify high confidence binding events (peaks) in human and mouse.

*Read Mapping:* For human ChIP-seq, mapped reads in the form of BAM files were downloaded from ENCODE UCSC DCC (<http://encodeproject.org/ENCODE/downloads.html>). These BAM files were generated by the individual data production labs using different mappers and mapping parameters. For mouse ChIP-seq, reads were mapped by BWA. In order to standardize the mapping protocol, we used custom mappability tracks to filter out multi-mapping reads and only retain unique mapping reads i.e. reads that map to exactly one location in the genome. We also filtered all positional and PCR duplicates.

*Quality control:* A number of quality metrics for all replicate experiments of each dataset were computed. In brief, these metrics measure ChIP enrichment and signal-to-noise ratios, sequencing depth and library complexity and reproducibility of peak calling. These measures will be reported at the ENCODE portal at <http://encodeproject.org/ENCODE/qualityMetrics.html>. Datasets that did not pass the minimum quality control thresholds were discarded and not used in any analyses. Datasets that passed most but not all quality metrics were flagged.

*Peak Calling:* All ChIP-seq experiments were scored against an appropriate control designated by the production groups (either input DNA or DNA obtained from a control immunoprecipitation). We used the SPP<sup>26</sup> peak caller to identify and score (rank) potential binding sites/peaks. For obtaining optimal thresholds, we used the Irreproducible Discovery Rate (IDR<sup>27</sup>) framework to determine high confidence binding events by leveraging the reproducibility and rank consistency of peak identifications across replicate experiments of a dataset. Code and detailed step-by-step instructions to call peaks using the IDR framework are available at <https://sites.google.com/site/anshulkundaje/projects/idr>.

*Black list:* All peak sets were then screened against specially curated empirical blacklists for each species. Briefly, these blacklist regions typically show the following characteristics:

- Unstructured and extreme high signal in sequenced input-DNA and control datasets as well as open chromatin datasets irrespective of cell type identity.
- An extreme ratio of multi-mapping to unique mapping reads from sequencing experiments.
- Overlap with specific types of repeat regions such as centromeric, telomeric and satellite repeats that often have few unique mappable locations interspersed in repeats. The human blacklist can be downloaded from:

<http://hgdownload.cse.ucsc.edu/goldenPath/hg19/encodeDCC/wgEncodeMapability/wgEncodeDacMapabilityConsensusExcludable.bed.gz>). The Mouse blacklist can be downloaded from: (<http://www.broadinstitute.org/~anshul/projects/mouse/blacklist/mm9-blacklist.bed.gz>)

*Comparison with DHS:* To systematically investigate to what degree TF binding sites overlap with DNase I HSS, we performed the following analysis in MEL and CH12 cell lines. First we



merged all the binding sites from different transcription factors in the same cell line (33 TFs in CH12 and 43 TFs in MEL), and compared the union of the binding sites with DHS in the same cell type. We found 61% and 72% of TFBS in MEL and CH12 overlap with DHS, and 81% and 67% of DHS in MEL and CH12 overlap with TFBS in the same cell type (Supplementary Fig. 19).

### ***Ren lab***

ChIP-Seq reads were aligned to the mouse genome build mm9 with Bowtie version 0.12<sup>21</sup>. We used the first 25 bp for the alignment and only kept the reads with less than two mismatches. Duplicated reads from the same biological library were removed. For each chromatin mark, we have at least two good biological replicates. After we verified that biological replicates are highly correlated, they were pooled for all subsequent data analysis.

### ***Hardison Lab***

The ChIP-seq reads were moved to a data library in Galaxy, and the tools implemented in Galaxy were used for further processing via workflows<sup>19</sup>. There are two biological replicates for each ChIP target in each condition. The reads from two replicates were pooled and then mapped to the mouse genome (mm9 assembly) using the program Bowtie<sup>21</sup>, and the mapped reads for the ChIP sample and from the "input" control (no antibody) were processed by MACS<sup>28</sup> to calculate signals (tag counts for every 1 bp segment). Peaks or enrichment domains were identified by MACS for TF occupancy, or by SICER<sup>29</sup> for histone modifications.

### **DNase-seq data analysis (Stamatoyannopoulos group)**

Sequence alignment to the mouse genome was performed using Bowtie<sup>21</sup>. Only uniquely mapping reads were utilized in the analysis. DHS peaks were identified as described in<sup>8</sup> using a false discovery rate threshold of 1%. DNaseI footprints were identified within DNaseI hotspot regions as described in<sup>30</sup> using a false discovery rate threshold of 1%. In cases where more than one biological replicate was available for analysis, the replicate with the highest proportion of uniquely mapped reads falling within DNaseI hotspots<sup>8</sup> was selected for analysis.

### **Replication Timing analysis (Gilbert group)**

Replication timing profiles were smoothed from raw early/late CGH timing values ( $\log_2$  Cy3/Cy5 enrichment) for individual probes using loess with a span of 700kb, and timing values were normalized to an equivalent interquartile range between experiments. Replication boundaries were identified as the borders of transitions between relatively earlier and later replicating regions (timing transition regions; TTRs) with a slope above  $\pm 9e-7$  RT units / bp. The density of replication boundary positions was determined for each cell type, and significantly aligned boundary positions were defined as those with a density above the 95th percentile of control sets with equivalent numbers of random positions. To determine the level of boundary usage/preservation between cell types, we used methods from the MALDIquant R package to align and consolidate peaks between multiple replicates into a unified set of positions. For comparisons of replication boundary conservation between species, windows  $\pm 100$  kb from

boundary positions were converted between mouse (mm9) and human (hg19) assemblies using UCSC liftOver, using standard parameters. Fractions of overlapping boundary positions were determined using the GenomicRanges package in R. Spearman correlations between RT and epigenetic profiles (Fig. 7i) were calculated from the number of significantly enriched sites (peaks of UW DNase I, Stanford/Yale TFBS, and BROAD histone marks relative to input control profiles) within nonoverlapping 200kb windows.

### **Prediction of candidate promoters and enhancer from chromatin modification profiles (Ren Lab)**

To predict promoters, we relied exclusively on the presence of H3K4me3<sup>15</sup>. To predict enhancers, we used the following three chromatin marks, H3K4me1, H3K4me3 and H3K27ac. We divided the mouse or human genome into 100 bp bins, and counted the number of reads that fell within each bin. We normalized the tag counts in each bin according to the total number of reads. Input reads were processed in the same way and their normalized signal intensity values were subtracted from the IP tracks. Therefore, the height of each 100 bp bin in genome browser is computed as:  $\Delta$  normalized signal intensity = normalized signal intensity<sub>IP</sub> - normalized signal intensity<sub>input</sub>. The normalized signals were used as the input file for enhancer prediction. Then we predicted enhancers with the RFECS method as described in<sup>31</sup>. We only kept the predicted enhancers with probability greater than 0.7 and at least 3Kb away from a known TSS. We also compared the predicted enhancers with DNase I sites and found the median distance is only between 300-400bp (Supplementary Fig. 20).

### **Annotation of protein-coding and non-coding orthologs in the human and mouse genomes**

We first compiled a list of orthologous protein coding genes by combining the results from the Ensembl GeneTrees v65 (<http://e65.ensembl.org>,<sup>32</sup>) and a novel pipeline (modENCODE) developed specifically for comparisons among the human, mouse and modENCODE projects. The two methods are both based on phylogenetic reconstruction, but they differ in the software implementation and the reference species used. While Ensembl GeneTrees focus on vertebrate genomes, the modENCODE set is built on 12 *Drosophila*, 5 *Caenorhabditis*, the human, mouse, and yeast genomes (*Wu et al, in prep.*). Each method provides a list of 1:1, 1:many, many:1 and many:many orthologs. While there are some differences among the list, the large majority of the 1:1 orthologs are identical in both sets. To merge the results, we have decomposed the orthologues into pairs of orthologous genes. The pairs present in both sets are used in the final set. These pairs are supplemented with pair from either set that is further supported by orthology to either rat or dog (*Wu et al., in prep.*). The final set of orthologues contain a larger number of 1:1 and a lower set of many:many relationships, which suggests an increase in the quality of the results (Supplementary Table 13). We have assessed the final set using 3 different criteria: the BLAST e-values for the pairs of orthologous proteins, the bootstrap score for the speciation nodes relating the orthologues and a simple count of human and mouse genes sharing the same gene symbol. All the criteria show an improvement in the final set with respect to either of the individual results (*Wu et al., in prep.*).

Next, to infer orthologies among short ncRNA genes, we used a similar phylogenetic approach as for the protein coding genes (*Pignatelli et al, submitted.*). In short, the genes are classified

according to their RFam family<sup>33</sup> and aligned with Infernal<sup>34</sup> and different trees are built with RAxML<sup>35</sup> using the 16 different secondary structure models. In addition, the gene loci including their flanking regions are aligned with PRANK<sup>36</sup> and two further trees are built with TreeBeST<sup>37</sup>, namely a Neighbour Joining and a Maximum Likelihood tree. All trees are merged with TreeBeST merging algorithm, producing one final tree per family. The human-mouse short ncRNA orthologues correspond to the release 67 of Ensembl (<http://e67.ensembl.org>,<sup>32</sup>).

Additionally, to identify the orthologous long non-protein coding RNA genes, we used the PipeR framework developed in<sup>38</sup> and adapted it so that it would report multiple homologues between the human and mouse. The original pipeline was also completed with a synteny analysis module, relying on the ENSEMBL comparative orthology dataset (ENSEMBL 71). Altogether, this allowed us to map the 17,547 human long non-coding RNA (lncRNA) transcripts annotated in Gencode v10 onto the mouse genome. We found 2,327 human transcripts (corresponding to 1,679 genes) homologous to 5,067 putative mouse transcripts (corresponding to 3,887 putative genes) (Supplementary Fig. 3). This result suggests that unlike protein coding genes, only a fraction of lncRNA is constrained enough at the primary sequence level to retain a similarity statistically significant between human and mouse. As a consequence, most lncRNA appear to be species specific, at least from a primary sequence point of view. This observation suggests they may be very distinct from proteins, or other highly structured lncRNA (like ribosomal subunits) that remain highly similar, even at high evolutionary distances, owing to the constraint imposed on the primary sequence by the secondary structure maintenance.

Following the efforts to build an automated set of orthologs by merging two initial sets (Wu et al, in prep.) and the analysis of the co-expression of 1-to-1 orthologs, we have built a list of 80 suspicious pairs of 1-to-1 orthologs (Supplementary table S33). This list includes the cases where the orthologous gene is not the one with a matching gene symbol. Although a few gene symbols are well-known to disagree between these two species, the expectation is that most of the 1-to-1 orthologs between human and mouse should have matching gene symbols. The majority of the suspicious cases involves genes from the same family and reflects the difficulty to differentiate orthologs and close paralogs.

We have curated the list manually by checking the quality of the pairwise alignments. We have also compared this list to a more recent Ensembl release (Ensembl 75, <http://e75.ensembl.org>) that features the latest Mouse assembly (GRCm38). Although the information from pairwise alignments might be misleading, we have relied on cases where the pairwise alignments are clearly showing one best reciprocal hit in terms of alignment score (BLAST e-value), coverage (% of the protein that is aligned) and identity (% identity between both proteins in the alignment). In some cases, this information is not sufficient and we have looked at the synteny data to elucidate the right pairing.

Based on this analysis, 31 (39%) of the cases were clearly misannotated as 1-to-1 orthologs. These involved difficult corner cases like 5 histone proteins that are too similar to be correctly classified using their protein sequence only; an additional 8 erroneous pairs that are related by partial alignments only; another 5 cases involve genes that appear to be retrotransposed copies in mouse; and 4 annotated pairs are close paralogues instead of orthologues. The rest of the cases are more challenging to classify, as they involve either complex families like the protocadherin

beta genes or additional gene copies that could be either recent duplications or dubious annotations in the mouse genome.

There are 10 genes (13%) for which it is very difficult to confirm or reject the 1-to-1 relationship. These typically involve large families of very similar genes. 14 genes (17%) have been deprecated or re-annotated as pseudogenes since the phylogenetic analysis was performed. The remaining 25 cases (31%) appear to be correct 1-to-1 orthologs or at least the closest ortholog for complex relationships. This includes well-known cases like human PGM1 and mouse Pgm2, and human PGM2 and mouse Pgm1. The list also includes 3 cases that are more controversial as one of them involves a read-through transcript that spans two genes in the other species. We consider these to be correct annotations as the loci are indeed orthologous.

We note that the full list of 1-to-1 orthologs contain nearly 14,000 pairs with matching gene symbols. The list of suspicious 1-to-1 orthologs represents a very small fraction of the predicted pairs and only a 40% (less than 0.25% of the total) could be confirmed as false positives.

### **Determination of transcribed sequences in the human and mouse genomes**

The mouse and human genomes (mm9 and hg19 respectively) were partitioned into genomic domains at the nucleotide level, in an unstranded way. They were first partitioned into genic, intergenic and gap regions based on annotated long transcripts (ensembl v65 for mouse and gencode v10 for human) and assembly gaps of the respective assemblies available at the UCSC genome browser. Genic nucleotides were then further partitioned into exonic and intronic regions, giving priority to exons over introns.

For each species, the RNA-seq genome and genomic domain (exonic, intronic, intergenic) coverage was computed using all RNA-seq contigs with an IDR value lower or equal to 0.1 (hereafter simply called contigs). More precisely, the RNA-seq genome coverage was computed as the fraction of the genomic nucleotides not included in gaps, that overlapped with RNA-seq contigs, and the genomic domain (exonic, intronic, intergenic) coverage as the fraction of the genomic domain nucleotides that overlapped with RNA-seq contigs.

### **Analysis of splicing patterns**

Exon boundaries of human and mouse genes were extracted from the genomic annotations (Gencode v.10 and Ensembl NCBIM37.65). Additionally, novel splice sites predicted from the RNAseq data were included in the analysis if (i) they were supported by non-zero SJ counts in at least 15% of samples and (ii) the other boundary of the supporting SJ was an annotated splice site (i.e., the SJ with both unannotated boundaries were not considered). One-to-one correspondence between human and mouse splice sites was established as follows. Pairwise whole-genome (chain) alignments from the UCSC genome browser database<sup>39</sup> were used to construct (non-unique) projections of human splice sites to the mouse genome and, vice versa, mouse splice sites to human genome. Unique projections were obtained from multiple projections by filtering, where the objective function was to maximize the length of continuously aligned region per each gene<sup>40</sup>. Only splice sites that were mapped uniquely and bijectively (i.e., the human-to-mouse and mouse-to-human projections were mutually inverse as functions) were

retained for the comparative analysis. One-to-one correspondence between segments (exons or introns) was such that a human segment was said to be orthologous to a mouse segment if the corresponding boundaries were orthologous (as defined above). The orthology relationship on protein-coding genes that was induced by one-to-one correspondence of splice sites was identical to that in the human-mouse ortholog list in more than 94% gene pairs (Wu *et al.*, in prep.). At that, 2,673 novel human and 4,087 novel mouse exons were predicted when one of the boundaries was unannotated in one of the species but supported by both SJ in RNAseq and bijective mappings. Quantitative splicing estimates were computed by *bam2ssj* software using only annotated SJs and requiring minimum 10 counts in the denominator of the fraction defining  $\psi_5$ ,  $\psi_3$ ,  $\theta_5$  and  $\theta_3$ <sup>40</sup>. Pooled values of  $\psi_i$  and  $\theta_i$  ( $i=5,3$ ), denoted by  $\psi$  and  $\theta$ , respectively, were used to compute sample statistics. At that,  $\psi$  and  $\theta$  samples with more than 25% missing values were excluded from the analysis. The integrated analysis pipeline, as well as the lists of orthologous exons *etc.* are available at [http://genome.crg.eu/~dmitri/splicing\\_pipelines/](http://genome.crg.eu/~dmitri/splicing_pipelines/)

### Homology based prediction of the mouse lncRNA complement

The lncRNAs were searched using the homology based strategy reported in<sup>38,41</sup>. It involved using spliced transcripts of Human Long Non Coding RNAs (Gencode 10) as queries, blasting them (17151342) against the mm9 assembly of the mouse genome previously masked for interspersed repeats and mouse specific low complexity regions using repeat masker (<http://www.repeatmasker.org>). The hits thus obtained were used as anchor points, the surrounding genomic regions were extracted and realigned to the original query using exonerate in split mapping alignment mode, which allows for intron modeling between the query and the extracted genomic sequence. Hits aligned to the query but covered with more than 20% of known ancestral repeats were removed from the analysis in order to avoid the inclusion of non-related sequences.

### Gene expression analysis

We performed Principal Component Analysis (PCA) of gene expression on several human and mouse samples. Given the heterogeneity of the data, which include cell lines for human and tissues for mouse, we complemented the human data set with tissue samples from the Illumina Human Body Map project (HBM, [www.illumina.com](http://www.illumina.com); ArrayExpress ID: E-MTAB-513). To obtain more construable results we selected only samples from related organs between human and mouse. The dataset used to generate Fig. 2a,b and Supplementary Fig. 4a,b consisted of 10 human tissue samples from HBM and 10 matching mouse tissue samples from Cold Spring Harbor Laboratory (CSHL). The final dataset for Fig. 2c,d and Supplementary Fig. 4c,d consisted of 8 and 3 human cell samples from CSHL and Caltech, respectively, 12 human tissue samples from HBM and 15 mouse tissues from CSHL.

The analysis was performed within R with the function `prcomp()`. The measure used for gene expression is log10-transformed RPKM. A pseudocount of 0.01 was added to genes which were not detected or were detected at inconsistent levels between replicates, when replicates were available ( $IDR \leq 0.1$ ). Genes with a maximum RPKM greater than 0.1 in each dataset, namely human cell lines (CSHL and Caltech), human tissues (HBM) and mouse tissues (CSHL), were kept. The PCA in Fig. 2a,c and Supplementary Fig. 4a,c was performed on expression values that



were normalized across all samples, by centering and scaling the log<sub>10</sub>-transformed RPKM across samples for a given gene. The PCA in Fig. 2b,d and Supplementary Fig. 4b,d was performed on centered and scaled expression values across each dataset.

### Variance decomposition

To assess the contribution of tissue and species to gene expression variation, we used a linear mixed model (LMM). Gene expression was modeled as a function of tissue and the species (considered as random factors). The LMM was implemented in the R package lme4 (*ref*). To restrict our analysis to matching samples, we used a dataset consisting of 10 human tissue samples from HBM and 10 matching mouse tissue samples from Cold Spring Harbor Laboratory (CSHL). This dataset is the same used to generate Fig. 2a and Extended Data 1c. In the same way, only genes with a maximum RPKM greater than 0.1 in each species were kept. We used log<sub>10</sub> (RPKM) to normalize the data and a pseudocount of 0.01 to deal with zero expression values. The restricted maximum likelihood (REML) estimators for the random effects of tissue, species and residual variance were normalized by their sum to give the variance components (Fig. 2b). We selected genes whose fraction of variance explained by tissues or species was in their respective top quartile and higher than the other fraction to cluster the samples in Extended Data 1a,b. Euclidean distance and complete linkage were used for clustering both samples and genes. Extended Data 1a and b show the gene expression values, as described above, for genes with a higher fraction of variance explained by tissues or species, respectively.

### Neighborhood analysis of conserved co-expression (NACC) (Mike Beer)

Since comparisons of transcript abundance between mouse and human revealed both species specific differences and similarities, we next developed methods to quantify the conservation of coexpression across the mouse and human samples, focusing on the variation in orthologous transcript levels in each species in a way that did not require precisely matched cell lines, tissues, or developmental stages. For the set of human genes with mouse orthologs, we calculated the correlation between every pair of human genes separately across all human samples ( $C_{ij}^{\text{Hs}}$ ) and the correlation of the orthologs of the pair across all mouse tissues ( $C_{ij}^{\text{Mm}}$ ) and we plot the joint distribution of these quantities in Supplementary Fig. 22a. The tilt of this distribution quantifies the conserved coexpression of all orthologous gene pairs. For a negative control, for each pair of human genes we chose a random pair of mouse genes and show this distribution in Supplementary Fig. 22b. We can quantify the differences between these two joint distributions by calculating the Z-score for the change between the actual and control distributions for each bin, and this Z-score is shown in Supplementary Fig. 22d. The actual distribution (a) has more pairs (positive Z-score) in the upper right and lower left (both pairs positively correlated or both pairs anti-correlated) and fewer pairs (negative Z-score) in the upper left and lower right (where the human pair is correlated, but the mouse pair is anti-correlated or vice versa), demonstrating a statistically significant tendency for both correlated and anti-correlated expression patterns to be preserved between species.

A measure of the conservation of expression for each gene,  $\Delta D$ , is computed by comparing each gene's non-normalized Euclidean distance to the orthologs of a set of similarly expressed genes, which we refer to as Neighborhood Analysis of Conserved Co-expression (NACC). For each human gene (the test gene), we define the most similarly expressed set of genes (N=20) across all the human samples as that gene's expression neighborhood. We then quantify the average



distance between the mouse ortholog of the test gene and each mouse ortholog of the neighborhood genes across the mouse samples. We can also flip species, and choose a mouse test gene and define a similarly expressed neighborhood in the mouse samples, and calculate the average distance between the orthologs of the test gene and neighborhood genes across the human samples. The average change of the human to mouse and mouse to human calculations is a symmetric measure of the degree of conservation of the co-expression for each gene,  $\Delta D$ . The distribution of this quantity for each gene is shown in Fig. 2e in the main paper, the blue distribution is the change in the distance relative to the orthologs of the gene's expression neighborhood, the red distribution is the change relative to a random gene set, showing that genes in one species show a strong tendency to be co-expressed with orthologs of similarly expressed genes in the other species. This quantity is a global measure of the significance of the conservation of patterns of co-expression between orthologous genes in human and mouse that does not rely on precise matching of samples by biological origin. Since this is a gene-by-gene measure of expression conservation, we can now quantify which biological processes tend to be more or less conserved between human and mouse. We calculated the average of  $\Delta D$  over each functional GO category. Since this varies with the size of the set, we calculated the significance of large or small  $\Delta D$  using the Z-score for finding a set of size  $N_{GO}$  with greater than observed  $\Delta D$  via random sampling. Fig 2f shows this Z-score for each functional GO category, highlighting those biological processes which tend to be more conserved between human and mouse (intracellular and nuclear processes) and those processes that have been less conserved (membrane, transmembrane and signaling receptors, and extracellular, see Supplementary Table 21).

In addition to quantifying the conservation of gene expression patterns, this approach (NACC) can also be applied to quantify the correlation of regulatory element activity across cell-types and tissues in the two species. First, we collected regulatory elements, separately using either H3K27ac chromatin marks or Dnase I signal, and then restricted these sets to clearly orthologous regulatory elements by stringent sequence alignment (>70% nucleotide conservation), and classified them as promoters if the distance to the nearest TSS was <3000bp. This process yielded independent sets of 71513 distal enhancers and 6282 promoters as defined from H3K27Ac signal, and 74713 distal enhancers and 7335 promoters as defined from DNase I signal. For these sets of orthologous regulatory elements then we calculated the correlation in H3K27ac activity or DNase signal activity across all available human and mouse tissues. The distribution of  $\Delta D$  for chromatin promoters, chromatin enhancers, DNase promoters, and DNase enhancers are shown in Fig. 4a-d. Both the chromatin and DNase signal at promoters show significant conservation, and the distribution of  $\Delta D$  for promoters is very similar to the distribution calculated based on gene expression levels (Fig. 2e). The distribution of  $\Delta D$  at distal enhancers also shows conservation in patterns of regulatory element activity. From these distributions we can observe that most of the sequence alignable regulatory elements are conserved in their activity.

To demonstrate the sensitivity and specificity of NACC in detecting both conserved and diverged gene expression programs between mismatched human and mouse samples, we carried the following analysis. We simulated two related species by starting with the mouse expression data analyzed above (30 tissues), and added variation to each gene by adding a fraction of the expression pattern of a randomly chosen gene to generate two classes of genes, a more conserved

NEG class (90%) and a less conserved POS class (10%), with euclidean distance distribution between the two species as shown in Supp. Fig. 6(a). We varied the mean distance between genes in the less conserved class ( $D_{\text{POS}}=10$  in (a)) and scaled the entire distribution to this value, generating pairs of species at 1x, .5x, .25x and .1x the observed difference between human and mouse expression data sets, while preserving two distinct classes. We approximately matched the actual human-mouse divergence using two distinct methods. First, we measured the NACC  $\Delta D$  on the full 30 conditions of the simulated data, as shown in Supp Fig 2(b), which compares quite favorably with the actual human-mouse NACC  $\Delta D$  in Fig. 2e in the main text.  $D_{\text{POS}}=10$  was chosen as 1xHM to match the mean of this distribution to the human-mouse distribution in Fig. 2e. The green distribution (.5xHM) uses  $D_{\text{POS}}=5$  and is approximately  $\frac{1}{2}$  of the human-mouse divergence. We also evaluated the difference in expression between the two simulated datasets using the joint distribution of pairwise correlation coefficients as in Supp. Fig. 22, as shown in Supp Fig. 6(c). The distribution for  $D_{\text{POS}}=10$  (1xHM) compares quite favorably with the actual human-mouse distribution shown in Supp. Fig. 22(a), whereas using .5x the human mouse divergence shows much more conserved coexpression (.5xHM). We then asked whether using NACC on a sampled subset of the full 30 conditions could still discriminate the less conserved genes from the more conserved genes, with the class determined using the euclidean distance across all conditions, but the NACC  $\Delta D$  using the partially matched samples. We removed up to 20 conditions for each sample independently. We used area under the ROC curve (AUC) (Supp. Fig. 6d) as a measure of the accuracy of NACC to discriminate the NEG and POS class, and we plot AUC vs. the number of overlapping (matched) samples in (Supp. Fig. 6e). If the distance between the simulated species is comparable or even half of the observed human-mouse divergence, NACC can accurately detect the rapidly evolving genes. Only if the distance between the species is quite small (.1xHM) and the number of matched samples is very small, does the accuracy of NACC drop significantly. In the former case the gene's evolution is not sufficient to change the membership of its neighborhood. For larger divergence, as long as most genes are expressed in several tissues/cell-types in the selected panel of mouse/human samples, it is only when there is no overlap of any of the expressed conditions that the NACC neighborhood expression pattern is an unreliable reference. This is quantified in (Supp. Fig. 6f), which shows that the majority of mouse and human gene expression patterns have similar entropy, consistent with expression across many tissues ( $S \sim \log(N_C)$ ) and very few genes are expressed in only one sample ( $S \sim \log(1)=0$ ).

### Sensitivity of evolving/conserved GO Categories to condition sampling

To assess the sensitivity of NACC in detecting evolving/conserved GO categories, we recalculated the most rapidly evolving and most conserved GO categories by sampling 100 subsets of the mouse and human conditions with 50% probability of inclusion and performing the NACC analysis in Fig 2d using these subsets. The GO categories with large positive and negative z-scores were very robust to this sampling of conditions, indicating that our sample of human and mouse cell-lines/tissues are diverse enough that our detection of evolving and species specific genes is not strongly biased by our sample selection. We selected all GO categories that were either in the top 10 or bottom 10 of the ranked z-score list, and plot the z-scores of each of these GO categories in Supplemental Fig. 7a. We also list the number of times each of these GO categories was in the top or bottom 10, and their average z-score, in Supplemental Fig. 7(b) and (c).

We developed NACC because of the difficulty or impossibility of analyzing perfectly matched biological samples. But to confirm the conserved and species specific expression detected in our broader ENCODE dataset, we repeated NACC on a limited collection of more closely matched tissues and primary cell types. We mapped CAGE tags from 14 matched primary cells from the Riken Fantom 5 dataset (Nature 507, 462–470 2014) to gencode TSSs (aortic smooth muscle cells, CD4+ T cells, CD8+ T cells, marrow derived mesenchymal stem cells, meningeal cells, cerebral neurons, schwann cells, cerebellar astrocytes, hepatic sinusoidal endothelial cells, hepatocytes, hepatic lipocyte stellate cells, cardiac myocytes, CD19+ B cells, and common myeloid progenitor cells) and used  $\log(\text{raw counts})$  for expression level, after removing any genes with fewer than 5 tags in mouse or human (13219 orthologous genes detected). For the matched tissues we used the 13 tissues in (Lin et al) (small intestine, sigmoid, spleen, lung, liver, brain ovary, testis, pancreas, heart, kidney, fat, adrenal). As shown in Supplementary Fig. 8a and b, the most significantly conserved or species specific GO categories in the ENCODE samples (highlighted) are also the most significant in the matched datasets, with slightly less significance for vasculature, immune system, and motility, presumably due to the specific tissues/cells selected or the smaller size of the matched sets.

## Chromatin state analysis (Hardison group)

### *Chromatin states from segmentations*

ChromHMM<sup>42</sup> was applied on the ChIP-seq data of four histone modifications in 15 mouse cell types/lines and 6 human cell lines to learn a multivariate HMM model for segmentation of mapped genome in each cell type. Specifically, the ChIP-seq mapped reads were first pooled from replicates for each of the four histone modifications (H3K4me3, H3K4me1, H3K36me3, and H3K27me3) in 15 mouse cell types/lines (G1E, G1E-ER4+E2, Erythroblasts, Megakaryocytes, CH12, Mel, ESbruce4, Thymus, Kidney, Small intestine, E14 Whole brain, Liver, Spleen, Heart, and Testis) and 6 human cell lines (GM12878, H1-hESC, HepG2, NT2-D1, NH-A, and K562) separately. These mapped reads were first processed by ChromHMM into binarized data in every 200 bp window over the entire mapped genome, with ChIP input reads as the background control. To learn the model jointly from mouse and human, a pseudo genome table was first constructed by concatenating mouse mm9 table and human hg19 table, then the model was learned from the binarized data in all 21 cell types, giving a single model with a common set of emission parameters and transition parameters, which was then used to produce segmentations in all cell types based on the most likely state assignment of the model. We tried models with up to 15 states and selected a seven-state model as it appeared most parsimonious in the sense that all seven states had clearly distinct emission properties, while the interpretability of distinction between states in models with additional states was less clear (Supplementary Fig. 2b). In addition, we found significant overlap between predicted enhancers and H3k4me1 state from chromHMM segmentation (Supplementary Fig. 21).

The majority of the genome in all human and mouse cell types was in the quiescent state, which is a segmentation category characterized by very low signal for any dynamic histone modification. This was observed using the 25-state models described in <sup>43</sup> and it is true for the 7-state models described here. One would expect some regions that are quiescent in one cell type would be active in another, corresponding to differential gene activation, but some regions could be quiescent in all cell types. We find that about 41% of the mouse genome was in a quiescent state in all the 15 cell types examined (Supplementary Fig. 10). This value appears to be quite different from the fraction of quiescent state in human genome (21%) <sup>43</sup>, but the difference could be largely explained by the different stringency for calling that state between the two models. The human model separated a “low signal” state from the quiescent state, but this separation was not resolved in the mouse model. The total coverage of these two states in human genome reaches 44%, which is quite close to 41% in mouse. When the same calculation is done on the three human cell types segmented by the 8-state model, we find 47% is quiescent in all three cell types.

### *Chromatin state maps*

State-maps were plotted to display the distribution of chromatin states on the neighborhoods of human-mouse one-to-one orthologous genes. Each gene (from the TSS to the polyA addition signal) was divided into 50 equal sized intervals, and 10kb regions 5' and 3' to each gene were also divided into 50 intervals of 200bp. Each interval was assigned to a chromatin state (based on the state assignment of the boundary nucleotide), and the state map displayed as a series of 150 dots colored by the state assignment. Then these strings of dots were stacked to show the state-map over all human-mouse one-to-one orthologous gene neighborhoods. In each cell type or line, the gene neighborhoods were sorted by the gene transcription levels which were average RPKM values of replicates (data from RNAseq Dashboard). The transcription levels of the genes were shown by white dots in each panel.

Based on the state-maps, first, in each gene neighborhood state-map which is a string of 150 points of states, the number of points in activating states (state 1 to 5) was counted to represent the chromatin activeness of this gene neighborhood. We applied two approaches to normalize these activeness values for clustering and PCA. In the first approach, the mean of the chromatin activeness of this gene was calculated in the cell types within each species separately. This mean was then subtracted from the chromatin activeness of the corresponding gene in individual cell types or lines, respectively for mouse and human, which resulted in species-normalized chromatin activeness for each gene neighborhood. In the second approach, the mean subtraction was computed across all cell types/tissues including both species. Hierarchical clustering and PCA were performed using the activeness values normalized by the two approaches respectively.

State maps were also plotted in differentially expressed genes between different lineages or between different stages in the same lineage. The differentially expressed genes were identified in mouse cell lines G1E (erythroid progenitor) versus erythroblasts which is a comparison within lineage, and in erythroblasts versus megakaryocytes which is a comparison between lineages. For each pair of comparison, the differentially expressed genes were separated into two groups based on whether they were higher expressed in one cell line or the other, and their chromatin

state-maps were displayed. The plot conventions are the same as in the state-maps of all ortholog gene neighborhoods.

The quiescent regions are depleted of transcripts in the major biotypes: protein-coding, non-coding and small non-coding RNAs in all eight tissues examined (Supplementary Fig. 12). As expected, chromatin states with active marks and modifications associated with transcriptional elongation are enriched for these RNAs. These enrichment/depletion calculations are done on a base-wise manner, with each nucleotide assigned as either being represented in RNA or not. We also examined the level of expression in each segmentation class for protein-coding genes. While the genes in the segmentation classes with active marks have higher expression scores, and those with repressive marks have lower scores, the genes in quiescent segments are expressed at low levels (Supplementary Fig. 12). Thus the quiescent zones are depleted of transcripts, and the transcripts that are covered are produced at low levels.

### Identification of predicted orthologous cis regulatory elements (Ren and Synder groups)

First we built a one-to-one mapping of human and mouse cis bases derived from reciprocal chained blastz alignments<sup>44</sup> available from the UCSC. Next we created a merged list of predicted promoters, enhancers and TF binding sites (Supplementary Table 5-8). We used program bnMapper to find the orthologous sequences between human and mouse (available at [https://bitbucket.org/james\\_taylor/bx-python/wiki/bnMapper](https://bitbucket.org/james_taylor/bx-python/wiki/bnMapper), MCP06).

We used the following command to locate the human orthologous sequences for the mouse cis elements:

```
bnMapper.py all.mouse.enhancers all.mouse.promoters Mouse_TFs_merged multi-tissue.master.mm9.bed.c4 mm9.hg19.rBest.chain -f BED12 -t 0.1 -o mm9_to_hg19_0.5
```

For Supplementary Fig. 9, we set the parameter  $-t$  as 0.5. For the random control, we generated same amount of reads with the same genomic coverage with the program shuffleBed from bedtools software package<sup>23</sup>. We run the simulations 100 times and took the average.

### Identification of lineage specific elements (Ren and Synder groups)

We first used a very similar approach as described above to find the orthologous sequences for the mouse cis regulatory elements.

```
bnMapper.py all.mouse.promoters mm9ToHg19.over.chain -f BED12 -o all.mouse.promoters.hg19
```

The main difference is that we used a different chain file that allows 1-to-many mapping (mm9ToHg19.over.chain, available from UCSC genome browser). In this case, the cis elements that cannot be mapped to the human genome even with the 1-to-many chains were used as the mouse-specific elements.

### Self-Organizing Map Methods:



The SOM was trained as described before (ENCODE Consortium, 2012) with the following modifications. The twelve ChromHMM segmentations in mouse tissues were combined into a single segmentation, using the ERANGE 3.3 partitioning script with a minimum segment size of 200bp, and all histone mark datasets read densities in RPKM were calculated to build a training matrix of 1.56 million segments x 60 ChIP-seq datasets was built using the ERANGE v3.3 buildMatrix.sh script, with a maximum threshold of 100 RPKM and the rescale option. Self-Organizing Maps were trained and analyzed using ERANGE v3.3. For every SOM instance, randomly split the matrix into a training set and scoring set, randomly initialized the toroid map from the training set, and incrementally trained the SOM with map size 30x45 using 156 million timesteps, which is equivalent to about 200 epochs (i.e. the number of times that we have gone through the training dataset), starting with an update radius of 15, and a learning rate of 0.2, both of which decreased exponentially over the course of training. Each segment was assigned to its best matching unit. We selected for analysis the best of 10 trials based on the lowest quantization error on the scoring set, which is defined as the average Euclidean distance of all segments to the prototype vector of their assigned unit.

GWAS SNP entries from the NHGRI Catalog were mapped onto mouse using the UCSC Genome Browser liftOver utility and were then mapped to their corresponding segments. To get the probability values for this test, each unit was analyzed to see the random chance of the GWAS SNPs appearing in that unit. The SNPs fit a binomial distribution because they are assumed to be independent as part of the significance test (SNPs on the same segment were collapsed to insure independence). Because several significance tests were performed simultaneously, a method needed to be selected to control the Familywise error rate using The Šidák version of the Holm-Bonferroni method correction. This method was applied to the probability values calculated for each unit, using the standard significance value of 5%.

### **Supplementary Figures Legends**

#### **Supplementary Figure 1: Functional validation of the candidate promoters and enhancers by a high throughput reporter assay in the mouse ES cells and embryonic fibroblast cells.**

(A) Flowchart of quantitative high throughput reporter assay (for details, please refer to the supplementary method section). (B) Percentage of candidate promoters or enhancers that show promoter/enhancer activities by luciferase reporter assay.

#### **Supplementary Figure 2: The genomic distribution of 7 chromatin states in each of the 15 mouse and 6 human tissues or cell types.**

**a**, The chromHMM model was learned based on four histone modifications (H3K4me1, H3K4me3, H3K36me3, H3K27me3) from all of the 15 mouse cell lines/tissues plus six human cell lines, and then applied in each cell type to segment the genome into seven states. The fraction of the genome in each state is shown as a pie chart for each cell type. **b**, The chromHMM model was learned with 1 to 15 states. The log(likelihood) of the model output by the program increased as number of states increased, while the extent of increment declined, especially after 5-state model.



**Supplementary Figure 3: Homology based identification of mouse lncRNA transcripts. a,** The small green circle represents the subset of the human Gencode lncRNA transcripts that could be mapped to the mouse genome. Within this circle, the figure in black represents the number of mouse putative transcripts found, and the figure in white the corresponding number of human Gencode transcripts. **b,** Overlap between the ENSEMBL set of mouse lncRNAs (in green) and the homology based subset (in red). In the intersection, the black number corresponds to ENSEMBL transcripts, while the white number corresponds to homology predicted transcripts.

**Supplementary figure 4: Principal Component Analysis (PCA) was performed for RNA-seq data for 10 human and mouse matching tissues (a) and for a set of 20 human cell lines and tissues and 15 mouse primary tissues (b).** The analysis in a and b is the same as Fig. 2 a and Extended Data Fig. 1C, and the only difference is that PC2 and PC3 is shown here.

**Supplementary Figure 5: NACC analysis for biological replicates in human and mouse.**

**Supplemental Figure 6: Simulations of ability of NACC to detect rapidly evolving genes in unmatched conditions.** We simulated two related species by starting with 30 conditions of mouse expression data, and added variation to each gene by adding a fraction of the expression pattern of a randomly chosen gene to generate two classes of genes, a more conserved NEG class (90%) and a less conserved POS class (10%), with euclidean distance distribution between the two species as shown in (a). We varied the mean distance between genes in the less conserved class ( $D_{\text{POS}}=10$  in (a)) and scaled the entire distribution to this value, generating pairs of species at 1x, .5x, .25x and .1x the observed difference between human and mouse expression data sets, as measured by NACC  $\Delta D$  as shown in (b), which compares quite favorably with the actual human-mouse NACC  $\Delta D$  in Fig. 2e. The green distribution (.5xHM) uses  $D_{\text{POS}}=5$  and is approximately  $\frac{1}{2}$  of the human-mouse divergence. We can also evaluate the difference in expression between the two simulated datasets using the joint distribution of pairwise correlation coefficients as in Supplementary Fig. 22, as shown in (c).  $D_{\text{POS}}=10$  (1xHM) compares quite favorably with the actual human-mouse distribution shown in Supplementary Fig. 22(a), whereas using .5x the human mouse divergence shows much more conserved coexpression (.5xHM). We then asked whether using NACC on a sampled subset of the full 30 conditions could still discriminate the less conserved genes from the more conserved genes. We removed up to 20 conditions for each sample independently. We used area under the ROC curve (AUC) (d) as a measure of the accuracy of NACC to discriminate the NEG and POS class, and we plot AUC vs. the number of overlapping (matched) samples in (e). If the distance between the simulated species is comparable or even half of the observed human-mouse divergence, NACC can accurately detect the rapidly evolving genes. Only if the distance between the species is quite small (.1xHM) and the number of matched samples is very small, does the accuracy of NACC drop significantly. This is due to the fact that most genes are expressed in several tissues/cell-types in the selected panel of mouse/human samples, and as quantified in (f), the majority of mouse and human gene expression patterns have similar entropy.

**Supplemental Figure 7: Species specific and conserved GO categories are robust to random condition sampling.** We sampled 100 random subsets of the mouse and human conditions and repeated the NACC analysis of Figure 2d. The z-score of any GO category which was ever in

the top or bottom 10 z-scores in any random sample is plotted for each sample in (a). The average z-score and number of times each of these GO categories was in the top or bottom 10 of the ranked z-score list are shown in (b) and (c).

**Supplemental Figure 8: Species specific and conserved GO categories detected in matched samples.** We repeated the NACC analysis on (a) matched primary cell types (RIKEN) and (b) matched mouse and human tissues. The most significantly conserved or species specific GO categories in the ENCODE samples (circles) are also detected as significant in the matched datasets, with slightly less significance for vasculature, immune system, and cell motility.

**Supplemental Figure 9: Conservation of predicted mouse cis regulatory elements in the human genome.** To define the orthologous sequences for the mouse cis elements in the human genome, we used program bnMapper and the reciprocal chained blastz alignments. For the random control, we generate same amount of reads with the same genomic coverage and run bnMapper with the same parameter. We run the simulations 100 times and took the average. For more details, please refer to the supplementary method section. \* indicates  $P < 2.2E-16$  by chi-squared test.

**Supplemental Figure 10: Distribution of chromatin states around the orthologous genes in the human and mouse tissue and cell types.** **a**, Heat maps displaying the distribution of the chromatin states over the neighborhoods of human-mouse one-to-one orthologous genes in 15 mouse cell lines/tissues and four human cell lines. The gene neighborhood intervals were sorted by the transcription levels of the genes in the corresponding cell type, which were shown by white dots. **b**, Distribution of chromatin states in differentially expressed genes. From all the human-mouse one-to-one orthologs, the differentially expressed genes were identified between G1E and ER4.

**Supplemental Figure 11: Correlation matrix for the fraction of gene neighborhoods in the quiescent state among seven mouse cell lines and six human cell lines.** For the members of orthologous gene pairs in human and mouse, the fraction of their gene neighborhood (TSS - 10kb to polyA site + 10kb) residing in state 6 (quiescent) in each cell type was computed. The matrix of pairwise correlations is shown (Pearson correlation coefficient).

**Supplemental Figure 12: Distribution of various classes of transcript in the segmentations.** **a**, Enrichment (red) or depletion (blue) of RNA-seq transcript categories (“RNA biotypes”) in each state for seven segmentations. **b**, Distribution of expression levels in segmentation states. The level of expression of each protein-coding RNA-seq contig intersecting a protein-coding gene in each state for liver and spleen segmentations was extracted, and the distribution of those values for each state is shown in the box plot.

**Supplemental Figure 13: Alignment of replication boundary positions across cell types.** For each cell type, the density of replication boundary positions (early and late borders of timing transition regions) are calculated. Boundary positions with significant alignment in each cell type are then identified from the local maxima of the boundary densities, and aligned as follows: 1) all positions are put into a sorted vector, 2) differences in position are calculated between each

neighboring boundary, 3) the position vector is divided at the largest gap, 4) repeat step 3 until i) differences in peak positions with the bin mean are below 50kb tolerance, or ii) each bin contains a single peak (adapted from MALDIquant methods).

**Supplementary Figure 14: Definitions and distributions of boundary classes.** After alignment between cell types (Supplementary Fig. 12), boundaries were further classified into nine categories **a**, according to the orientation of TTRs to either side of each boundary. Consolidation occurs preferentially in classes 3 and 6, which harbor especially small early and late domains with a single boundary. Analysis was focused on class 1 through 6 boundaries since 7-9 are most likely to be false boundary calls. Also, since consensus boundary positions do not precisely align with boundary positions in each individual cell type, the absolute timing transition between early and late boundaries occasionally dropped below the threshold for defining a TTR, resulting in a more stringent filtering of a small fraction of boundaries for preservation and conservation analysis. **b** and **c**, Number of RT boundaries present among the set of all aligned boundary positions for each boundary class and cell type shown.

**Supplementary Figure 15: Examples of conserved boundaries of each class.** Replication timing profiles for all mouse cell types are plotted for the first eight examples of conserved boundaries (those found with the same orientation and position in 10/11 cell types) for classes 1:6.

**Supplementary Figure 16: Mouse and Human Boundary Comparisons and Effect of Domain Consolidation During Development.** Pairwise percentage of boundaries conserved between cell types in mouse (**a**) and human (**b**) as a fraction of the number of boundaries in each type, with comparisons from rows to columns. Fewer boundaries are shared between widely divergent cell types (e.g., hESCs to HeLa; 42%) than those in similar states or differentiation intermediates (mESC->EBM3->EBM6->NPC; 77-81%). Note that the fact that only 13% of domain boundaries are constitutive does not contradict constitutive replication timing of approximately 50% of the genome, since constitutively replicated domains can be flanked by developmentally regulated boundaries depending on the RT of their neighboring domains (e.g. boundaries 2 and 5 in Supplementary Figure 14a). (**c**, **d**) Significance of boundary number reduction from hESCs, mESCs. Consolidation was predominantly found for small domains detected as a single boundary with timing transitions to both sides (classes 3 and 6 in Supplementary Figure 14a).

**Supplementary Figure 17: Comparison of chromatin features to RT.** Spearman correlations between chromatin features mapped in specific cell types and RT. The bottom right panel is an expanded version of Fig. 7I, to show the remaining changes in RT vs. changes in other chromatin features mapped in common between the indicated cell types.

**Supplementary Figure 18: The joint distribution of the expression (computed in RPKM by the flux capacitor program) of human genes based on long polyA+ RNAseq data, when mapping is done with the STAR mapper (x axis) versus with the TopHat mapper (y axis).** The different plots represent different RNAseq library protocols (dUTP, TruSeq), different cell lines (K562, GM12878) and different bioreplicates.

**Supplementary Figure 19: Comparison of DHS sites with TFBS in CH12 and MEL.** First we merged all the binding sites from different transcription factors in the same cell line (33 TFs in CH12 and 43 TFs in MEL), and compared the union of the binding sites with DHS in the same cell type. We found 61% and 72% of TFBS in MEL and CH12 overlap with DHS, and 81% and 67% of DHS in MEL and CH12 overlap with TFBS in the same cell type.

**Supplementary Figure 20: Median distance between candidate enhancers and nearest DNase I Hypersensitive sites.**

**Supplementary Figure 21: Comparison between chromHMM states with candidate enhancers.** **a.** Significant overlap between predicted enhancers and H3k4me1 state from chromHMM segmentation. The closest or overlapping chromHMM state was identified for each of the predicted enhancers. The proportion of the states for each tissue/cell type is shown as a piechart. **b.** Relationship between predicted enhancers and chromHMM states in locations. For each of the predicted enhancers, the closest distance to each of the seven chromHMM states was computed and displayed by empirical cumulative distribution plot.

**Supplementary Figure 22: Analysis of conserved of co-expression of gene pairs in the human and mouse genomes.** For the set of human genes with mouse orthologs, we calculated the correlation between every pair of human genes separately across all human samples ( $C_{\text{human}}$ ) and the correlation of the orthologs of the pair across all mouse tissues ( $C_{\text{mouse}}$ ) and plot the joint distribution of these quantities in **(a)**. The tilt of this distribution quantifies the conserved coexpression of all orthologous gene pairs. For a negative control, for each pair of human genes we chose a random pair of mouse genes **(b)**, the Z-score for the differences between the actual and control distributions in **(d)** shows a statistically significant tendency for both correlated and anticorrelated expression patterns to be preserved between species.

### **Supplementary References**

- 1 Djebali, S. *et al.* Landscape of transcription in human cells. *Nature* **489**, 101-108, doi:10.1038/nature11233 (2012).
- 2 Parkhomchuk, D. *et al.* Transcriptome analysis by strand-specific sequencing of complementary DNA. *Nucleic acids research* **37**, e123, doi:10.1093/nar/gkp596 (2009).
- 3 Jiang, L. *et al.* Synthetic spike-in standards for RNA-seq experiments. *Genome research* **21**, 1543-1551, doi:10.1101/gr.121095.111 (2011).
- 4 Mortazavi, A., Williams, B. A., McCue, K., Schaeffer, L. & Wold, B. Mapping and quantifying mammalian transcriptomes by RNA-Seq. *Nature methods* **5**, 621-628, doi:10.1038/nmeth.1226 (2008).
- 5 Stamatoyannopoulos, J. A. *et al.* An encyclopedia of mouse DNA elements (Mouse ENCODE). *Genome biology* **13**, 418, doi:10.1186/gb-2012-13-8-418 (2012).

- 6 Hawkins, R. D. *et al.* Distinct epigenomic landscapes of pluripotent and lineage-committed human cells. *Cell stem cell* **6**, 479-491, doi:10.1016/j.stem.2010.03.018 (2010).
- 7 Welch, J. J. *et al.* Global regulation of erythroid gene expression by transcription factor GATA-1. *Blood* **104**, 3136-3147, doi:10.1182/blood-2004-04-1603 (2004).
- 8 Thurman, R. E. *et al.* The accessible chromatin landscape of the human genome. *Nature* **489**, 75-82, doi:10.1038/nature11232 (2012).
- 9 John, S. *et al.* Chromatin accessibility pre-determines glucocorticoid receptor binding patterns. *Nature genetics* **43**, 264-268, doi:10.1038/ng.759 (2011).
- 10 Hesselberth, J. R. *et al.* Global mapping of protein-DNA interactions in vivo by digital genomic footprinting. *Nature methods* **6**, 283-289, doi:10.1038/nmeth.1313 (2009).
- 11 Samstein, R. M. *et al.* Foxp3 exploits a pre-existent enhancer landscape for regulatory T cell lineage specification. *Cell* **151**, 153-166, doi:10.1016/j.cell.2012.06.053 (2012).
- 12 Sabo, P. J. *et al.* Genome-scale mapping of DNase I sensitivity in vivo using tiling DNA microarrays. *Nature methods* **3**, 511-518, doi:10.1038/nmeth890 (2006).
- 13 Hiratani, I. *et al.* Global reorganization of replication domains during embryonic stem cell differentiation. *PLoS biology* **6**, e245, doi:10.1371/journal.pbio.0060245 (2008).
- 14 Ryba, T., Battaglia, D., Pope, B. D., Hiratani, I. & Gilbert, D. M. Genome-scale analysis of replication timing: from bench to bioinformatics. *Nature protocols* **6**, 870-895, doi:10.1038/nprot.2011.328 (2011).
- 15 Heintzman, N. D. *et al.* Distinct and predictive chromatin signatures of transcriptional promoters and enhancers in the human genome. *Nature genetics* **39**, 311-318, doi:10.1038/ng1966 (2007).
- 16 Arnold, C. D. *et al.* Genome-wide quantitative enhancer activity maps identified by STARR-seq. *Science* **339**, 1074-1077, doi:10.1126/science.1232542 (2013).
- 17 Dobin, A. *et al.* STAR: ultrafast universal RNA-seq aligner. *Bioinformatics* **29**, 15-21, doi:10.1093/bioinformatics/bts635 (2013).
- 18 Giardine, B. *et al.* Galaxy: a platform for interactive large-scale genome analysis. *Genome research* **15**, 1451-1455, doi:10.1101/gr.4086505 (2005).
- 19 Blankenberg, D. *et al.* Galaxy: a web-based genome analysis tool for experimentalists. *Current protocols in molecular biology / edited by Frederick M. Ausubel ... [et al.] Chapter 19*, Unit 19 10 11-21, doi:10.1002/0471142727.mb1910s89 (2010).
- 20 Goecks, J., Nekrutenko, A. & Taylor, J. Galaxy: a comprehensive approach for supporting accessible, reproducible, and transparent computational research in the life sciences. *Genome biology* **11**, R86, doi:10.1186/gb-2010-11-8-r86 (2010).
- 21 Langmead, B., Trapnell, C., Pop, M. & Salzberg, S. L. Ultrafast and memory-efficient alignment of short DNA sequences to the human genome. *Genome biology* **10**, R25, doi:10.1186/gb-2009-10-3-r25 (2009).
- 22 Trapnell, C., Pachter, L. & Salzberg, S. L. TopHat: discovering splice junctions with RNA-Seq. *Bioinformatics* **25**, 1105-1111, doi:10.1093/bioinformatics/btp120 (2009).



- 23 Quinlan, A. R. & Hall, I. M. BEDTools: a flexible suite of utilities for comparing genomic features. *Bioinformatics* **26**, 841-842, doi:10.1093/bioinformatics/btq033 (2010).
- 24 Li, H. *et al.* The Sequence Alignment/Map format and SAMtools. *Bioinformatics* **25**, 2078-2079, doi:10.1093/bioinformatics/btp352 (2009).
- 25 Trapnell, C. *et al.* Transcript assembly and quantification by RNA-Seq reveals unannotated transcripts and isoform switching during cell differentiation. *Nature biotechnology* **28**, 511-515, doi:10.1038/nbt.1621 (2010).
- 26 Kharchenko, P. V., Tolstorukov, M. Y. & Park, P. J. Design and analysis of ChIP-seq experiments for DNA-binding proteins. *Nature biotechnology* **26**, 1351-1359, doi:10.1038/nbt.1508 (2008).
- 27 Landt, S. G. *et al.* ChIP-seq guidelines and practices of the ENCODE and modENCODE consortia. *Genome research* **22**, 1813-1831, doi:10.1101/gr.136184.111 (2012).
- 28 Zhang, Y. *et al.* Model-based analysis of ChIP-Seq (MACS). *Genome biology* **9**, R137, doi:10.1186/gb-2008-9-9-r137 (2008).
- 29 Zang, C. *et al.* A clustering approach for identification of enriched domains from histone modification ChIP-Seq data. *Bioinformatics* **25**, 1952-1958, doi:10.1093/bioinformatics/btp340 (2009).
- 30 Neph, S. *et al.* An expansive human regulatory lexicon encoded in transcription factor footprints. *Nature* **489**, 83-90, doi:10.1038/nature11212 (2012).
- 31 Rajagopal, N. *et al.* RFECs: a random-forest based algorithm for enhancer identification from chromatin state. *PLoS computational biology* **9**, e1002968, doi:10.1371/journal.pcbi.1002968 (2013).
- 32 Flicek, P. *et al.* Ensembl 2013. *Nucleic acids research* **41**, D48-55, doi:10.1093/nar/gks1236 (2013).
- 33 Gardner, P. P. *et al.* Rfam: Wikipedia, clans and the "decimal" release. *Nucleic acids research* **39**, D141-145, doi:10.1093/nar/gkq1129 (2011).
- 34 Nawrocki, E. P., Kolbe, D. L. & Eddy, S. R. Infernal 1.0: inference of RNA alignments. *Bioinformatics* **25**, 1335-1337, doi:10.1093/bioinformatics/btp157 (2009).
- 35 Stamatakis, A. RAxML-VI-HPC: maximum likelihood-based phylogenetic analyses with thousands of taxa and mixed models. *Bioinformatics* **22**, 2688-2690, doi:10.1093/bioinformatics/btl446 (2006).
- 36 Loytynoja, A. & Goldman, N. Phylogeny-aware gap placement prevents errors in sequence alignment and evolutionary analysis. *Science* **320**, 1632-1635, doi:10.1126/science.1158395 (2008).
- 37 Li, H. *et al.* TreeFam: a curated database of phylogenetic trees of animal gene families. *Nucleic acids research* **34**, D572-580, doi:10.1093/nar/gkj118 (2006).
- 38 Derrien, T. *et al.* The GENCODE v7 catalog of human long noncoding RNAs: analysis of their gene structure, evolution, and expression. *Genome research* **22**, 1775-1789, doi:10.1101/gr.132159.111 (2012).
- 39 Meyer, L. R. *et al.* The UCSC Genome Browser database: extensions and updates 2013. *Nucleic acids research* **41**, D64-69, doi:10.1093/nar/gks1048 (2013).



- 40 Pervouchine, D. D., Knowles, D. G. & Guigo, R. Intron-centric estimation of alternative splicing from RNA-seq data. *Bioinformatics* **29**, 273-274, doi:10.1093/bioinformatics/bts678 (2013).
- 41 Esteve-Codina, A. *et al.* Exploring the gonad transcriptome of two extreme male pigs with RNA-seq. *BMC genomics* **12**, 552, doi:10.1186/1471-2164-12-552 (2011).
- 42 Ernst, J. & Kellis, M. ChromHMM: automating chromatin-state discovery and characterization. *Nature methods* **9**, 215-216, doi:10.1038/nmeth.1906 (2012).
- 43 Hoffman, M. M. *et al.* Integrative annotation of chromatin elements from ENCODE data. *Nucleic acids research* **41**, 827-841, doi:10.1093/nar/gks1284 (2013).
- 44 Schwartz, S. *et al.* Human-mouse alignments with BLASTZ. *Genome research* **13**, 103-107, doi:10.1101/gr.809403 (2003).

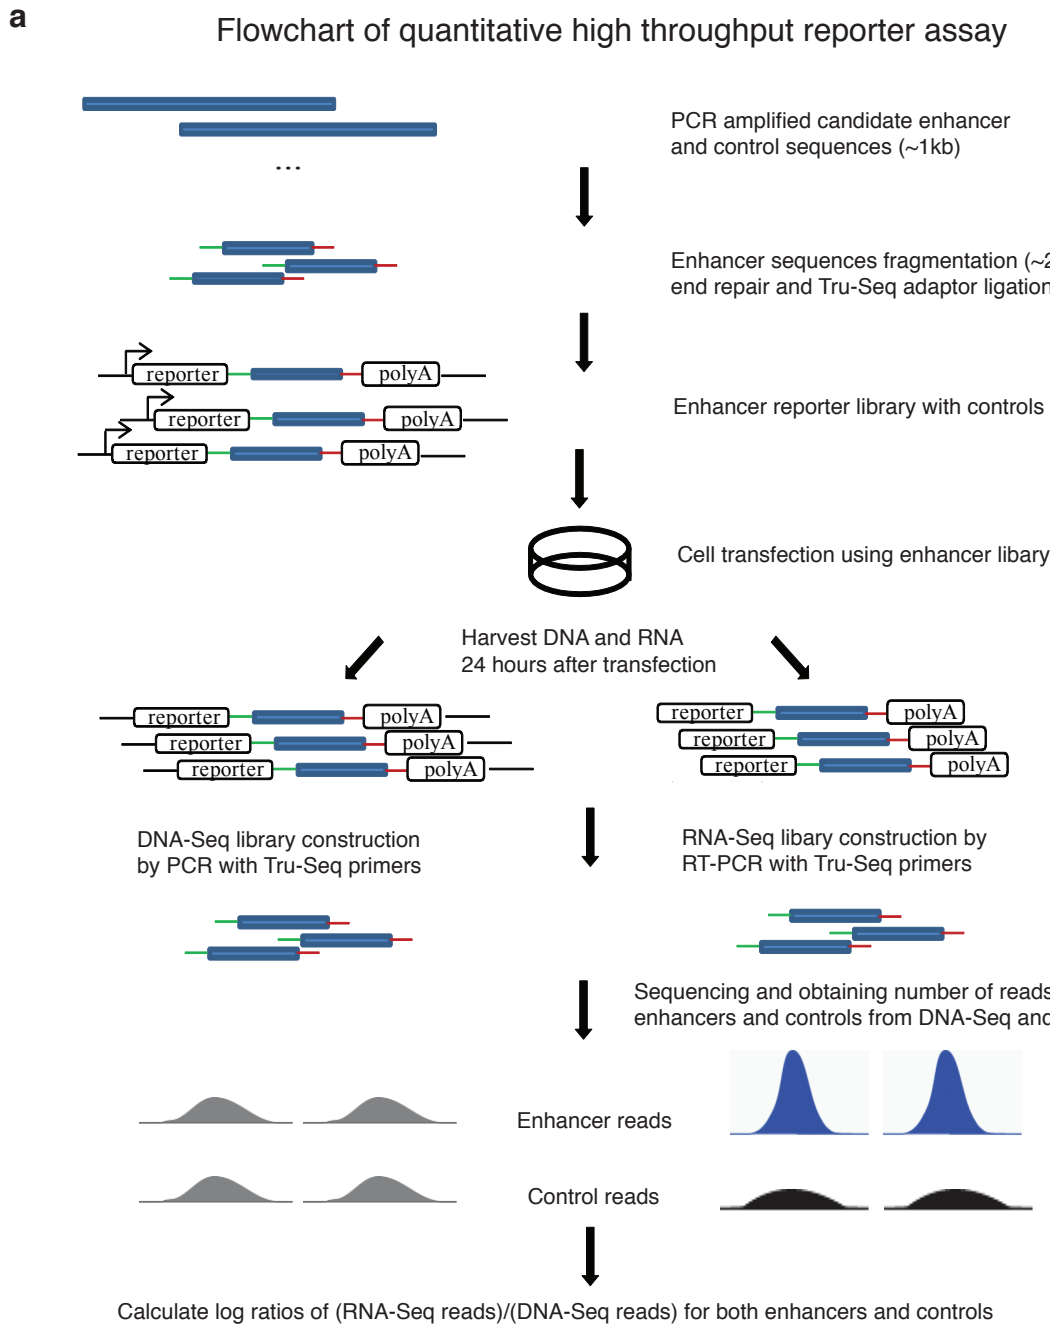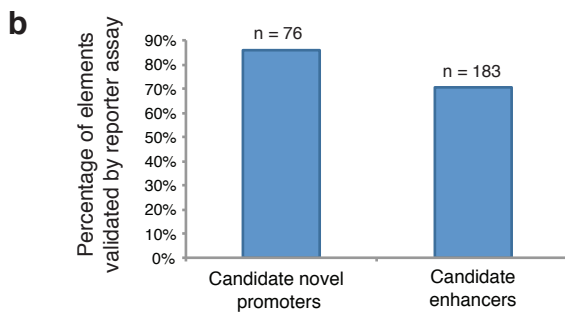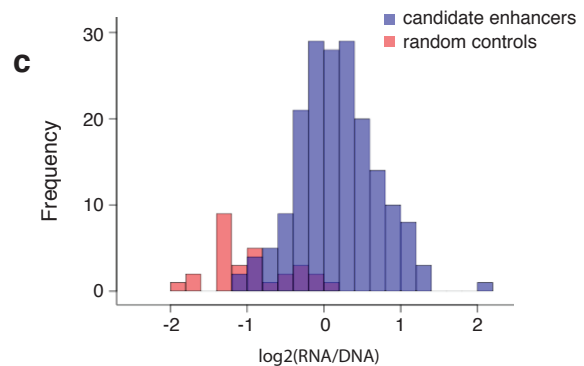

**Supplementary Figure 1: Functional validation of the candidate promoters and enhancers by a high throughput reporter assay in the mouse ES cells and embryonic fibroblast cells. a,** Flowchart of quantitative high throughput reporter assay (for details, please refer to the supplementary method section). **b,** Percentage of candidate promoters or enhancers that show promoter/enhancer activities by luciferase reporter assay. **(C)** Histogram showing the distribution of ratio of RNA/DNA for the enhancer assay.

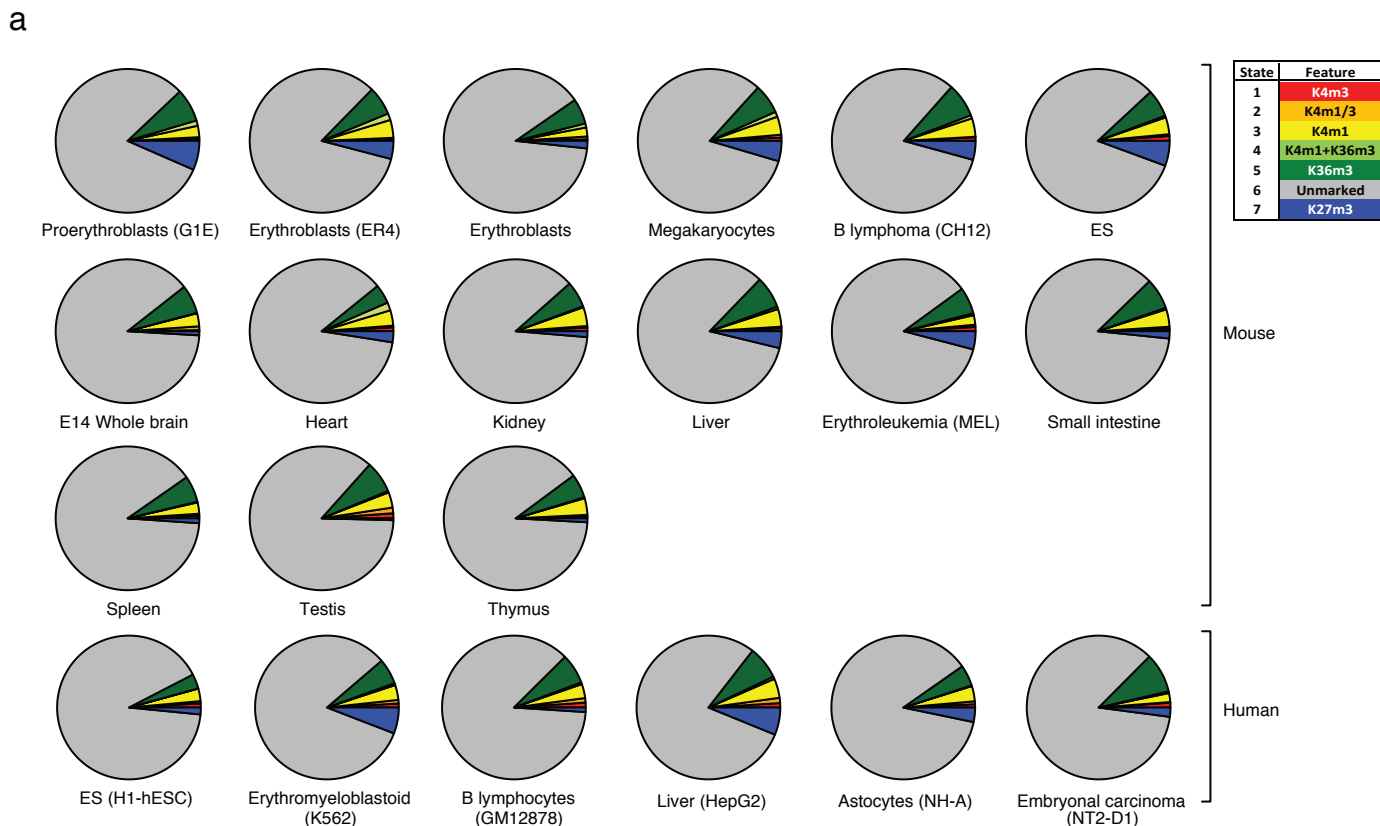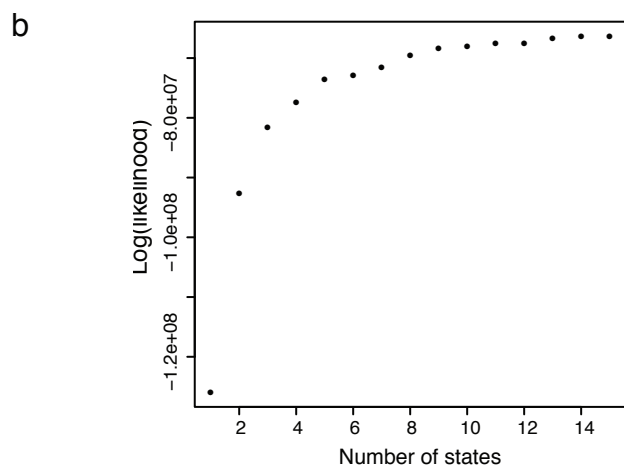

**Supplementary Figure 2:** The genomic distribution of 7 chromatin states in each of the 15 mouse and 6 human tissues or cell types. The chromHMM model was learned based on four histone modifications (H3K4me1, H3K4me3, H3K36me3, H3K27me3) from all of the 15 mouse cell lines/tissues plus six human cell lines, and then applied in each cell type to segment the genome into eight states. **B.** The chromHMM model was learnt with one to 15 states. The log(likelihood) of the model output by the program increased as number of states increased, while the extent of increment declined, especially after 5-state model.

**a**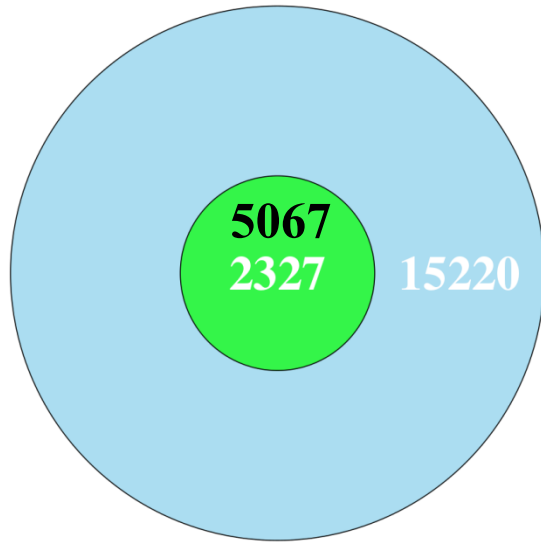**b**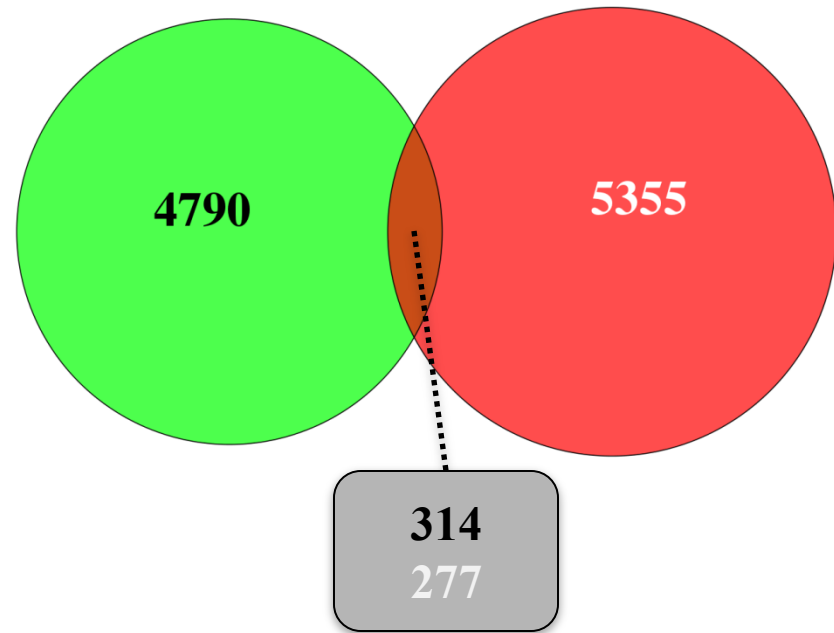

**Supplementary Figure 3: Homology based identification of mouse lncRNA transcripts.** **a**, The small green circle represents the subset of the human Gencode lncRNA transcripts that could be mapped to the mouse genome. Within this circle, the figure in black represents the number of mouse putative transcripts found, and the figure in white the corresponding number of human Gencode transcripts. **b**, Overlap between the ENSEMBL set of mouse lncRNAs (in green) and the homology based subset (in red). In the intersection, the black number correspond to ENSEMBL transcripts, while the white number corresponds to homology predicted transcripts.

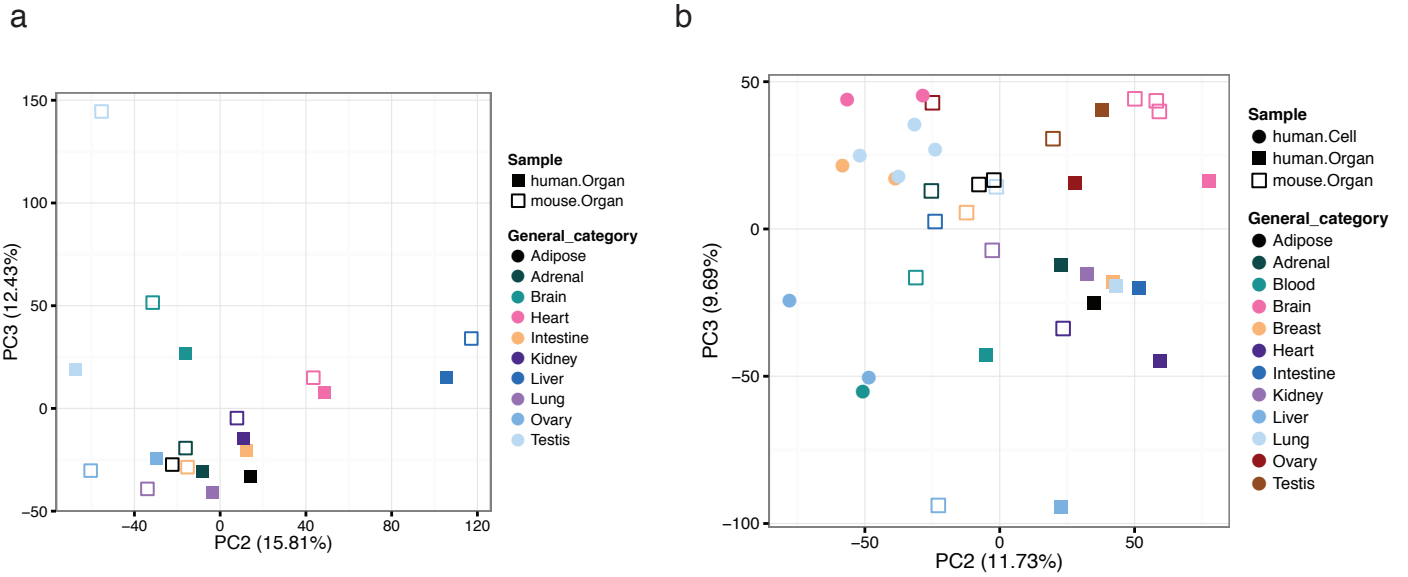

**Supplementary figure 4:** Principal Component Analysis (PCA) was performed for RNA-seq data for 10 human and mouse matching tissues (a) and for a set of 20 human cell lines and tissues and 15 mouse primary tissues (b). The analysis in a and b is the same as Fig. 2 a and Extended Data Fig. 1C, and the only difference is that PC2 and PC3 is shown here.



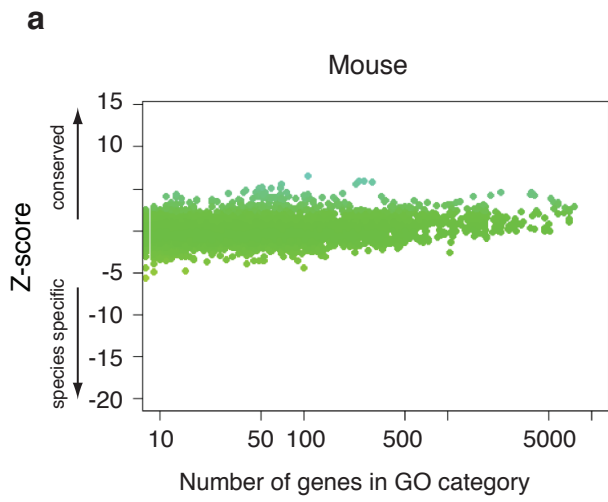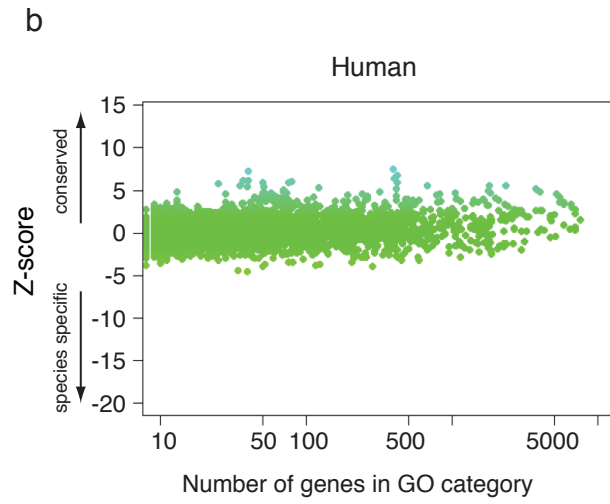

**Supplementary Figure 5: NACC analysis between biological replicates in human and in mouse.**

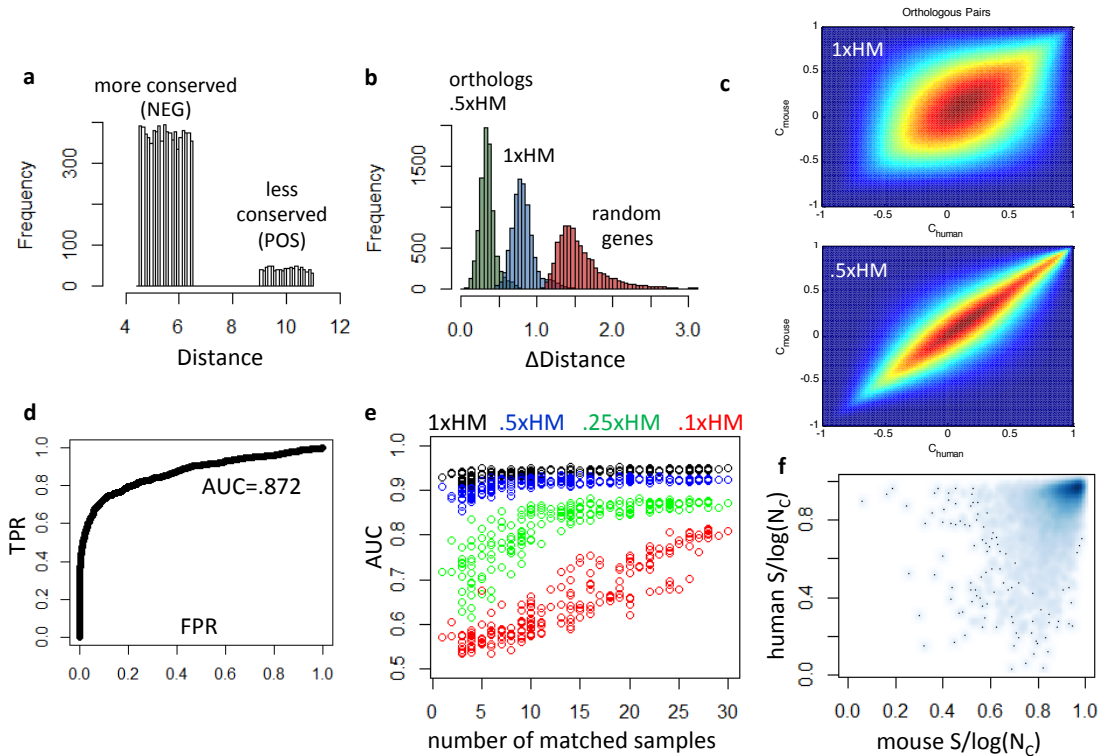

**Supplemental Figure 6: Simulations of ability of NACC to detect rapidly evolving genes in unmatched conditions.** We simulated two related species by starting with 30 conditions of mouse expression data, and added variation to each gene by adding a fraction of the expression pattern of a randomly chosen gene to generate two classes of genes, a more conserved NEG class (90%) and a less conserved POS class (10%), with euclidean distance distribution between the two species as shown in (a). We varied the mean distance between genes in the less conserved class ( $D_{\text{POS}}=10$  in (a)) and scaled the entire distribution to this value, generating pairs of species at 1x, .5x, .25x and .1x the observed difference between human and mouse expression data sets, as measured by NACC  $\Delta D$  as shown in (b), which compares quite favorably with the actual human-mouse NACC  $\Delta D$  in Fig. 2e. The green distribution (.5xHM) uses  $D_{\text{POS}}=5$  and is approximately  $\frac{1}{2}$  of the human-mouse divergence. We can also evaluate the difference in expression between the two simulated datasets using the joint distribution of pairwise correlation coefficients as in Supplementary Fig. 22, as shown in (c).  $D_{\text{POS}}=10$  (1xHM) compares quite favorably with the actual human-mouse distribution shown in Supplementary Fig. 22(a), whereas using .5x the human mouse divergence shows much more conserved coexpression (.5xHM). We then asked whether using NACC on a sampled subset of the full 30 conditions could still discriminate the less conserved genes from the more conserved genes. We removed up to 20 conditions for each sample independently. We used area under the ROC curve (AUC) (d) as a measure of the accuracy of NACC to discriminate the NEG and POS class, and we plot AUC vs. the number of overlapping (matched) samples in (e). If the distance between the simulated species is comparable or even half of the observed human-mouse divergence, NACC can accurately detect the rapidly evolving genes. Only if the distance between the species is quite small (.1xHM) and the number of matched samples is very small, does the accuracy of NACC drop significantly. This is due to the fact that most genes are expressed in several tissues/cell-types in the selected panel of mouse/human samples, and as quantified in (f), the majority of mouse and human gene expression patterns have similar entropy.

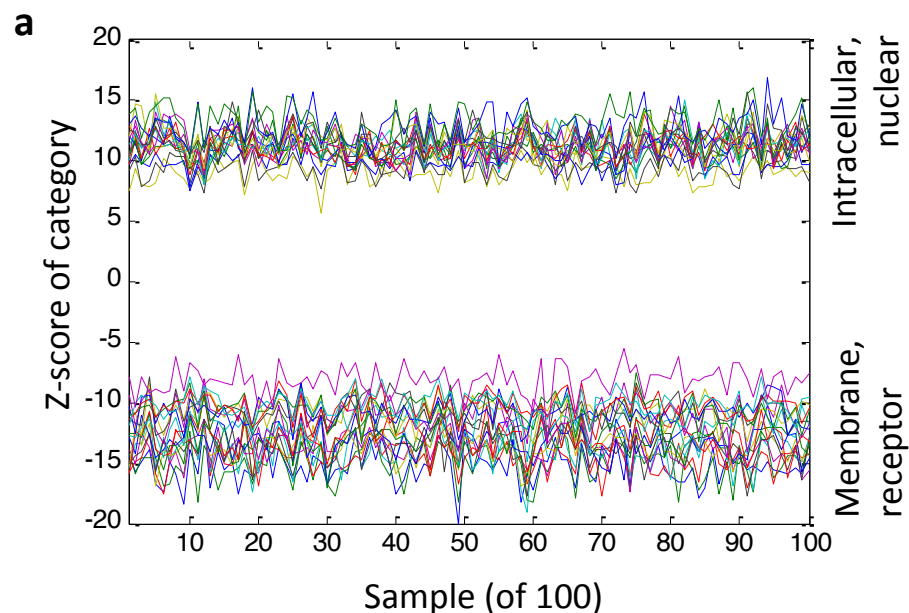

**b** Species specific:

| go term    | N   | <z-score> |                                     |
|------------|-----|-----------|-------------------------------------|
| GO:0005886 | 99  | -15.19479 | plasma membrane                     |
| GO:0071944 | 100 | -15.05556 | cell periphery                      |
| GO:0005576 | 100 | -14.51038 | extracellular region                |
| GO:0004888 | 94  | -13.98638 | transmembrane signaling receptor    |
| GO:0044459 | 94  | -13.75342 | plasma membrane part                |
| GO:0004872 | 94  | -13.6127  | receptor activity                   |
| GO:0038023 | 91  | -13.58393 | signaling receptor activity         |
| GO:0005887 | 81  | -13.13734 | integral to plasma membrane         |
| GO:0031226 | 85  | -13.09087 | intrinsic to plasma membrane        |
| GO:0044421 | 74  | -12.9195  | extracellular region part           |
| GO:0031012 | 37  | -11.79722 | extracellular matrix                |
| GO:0005578 | 15  | -11.06345 | proteinaceous extracellular matrix  |
| GO:0031224 | 10  | -10.83791 | intrinsic to membrane               |
| GO:0005615 | 7   | -10.80225 | extracellular space                 |
| GO:0004930 | 10  | -10.78896 | G-protein coupled receptor activity |
| GO:0016021 | 6   | -10.65094 | integral to membrane                |
| GO:0060089 | 1   | -10.29409 | molecular transducer activity       |
| GO:0004871 | 1   | -10.14543 | signal transducer activity          |
| GO:0002455 | 1   | -8.16477  | humoral immune response             |

**c** Conserved:

| go term    | N   | <z-score> |                                   |
|------------|-----|-----------|-----------------------------------|
| GO:0043170 | 2   | 9.09661   | macromolecule metabolic process   |
| GO:0005654 | 4   | 9.42091   | nucleoplasm                       |
| GO:0044237 | 11  | 9.95219   | cellular metabolic process        |
| GO:0043233 | 33  | 10.78154  | organelle lumen                   |
| GO:0031974 | 48  | 10.94642  | membrane-enclosed lumen           |
| GO:0070013 | 47  | 11.04836  | intracellular organelle lumen     |
| GO:0031981 | 44  | 11.05255  | nuclear lumen                     |
| GO:0044260 | 57  | 11.12734  | cellular macromolecule metabolism |
| GO:0044422 | 56  | 11.1508   | organelle part                    |
| GO:0044424 | 56  | 11.16491  | intracellular part                |
| GO:0044446 | 56  | 11.26187  | intracellular organelle part      |
| GO:0005622 | 63  | 11.36701  | intracellular                     |
| GO:0005634 | 76  | 11.63825  | nucleus                           |
| GO:0044428 | 77  | 11.78031  | nuclear part                      |
| GO:0043229 | 85  | 11.95167  | intracellular organelle           |
| GO:0043226 | 89  | 11.96123  | organelle                         |
| GO:0043227 | 96  | 12.87334  | membrane-bounded organelle        |
| GO:0043231 | 100 | 13.1441   | Intracellular membrane organelle  |

**Supplementary Figure 7: Species specific and conserved GO categories are robust to random condition sampling.** We sampled 100 random subsets of the mouse and human conditions and repeated the NACC analysis of Figure 2d. The z-score of any GO category which was ever in the top or bottom 10 z-scores in any random sample is plotted for each sample in (a). The average z-score and number of times each of these GO categories was in the top or bottom 10 of the ranked z-score list are shown in (b) and (c).

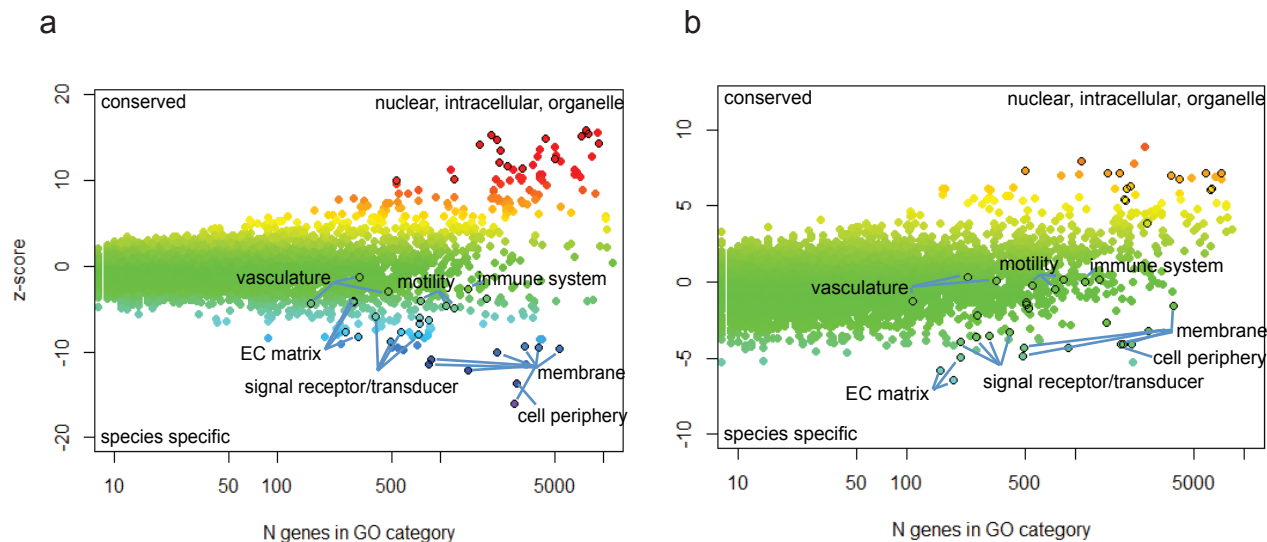

**Supplemental Figure 8: Species specific and conserved GO categories detected in matched samples.** We repeated the NACC analysis on (a) matched primary cell types (RIKEN) and (b) matched mouse and human tissues. The most significantly conserved or species specific GO categories in the ENCODE samples (circles) are also detected as significant in the matched datasets, with slightly less significance for vasculature, immune system, and cell motility.

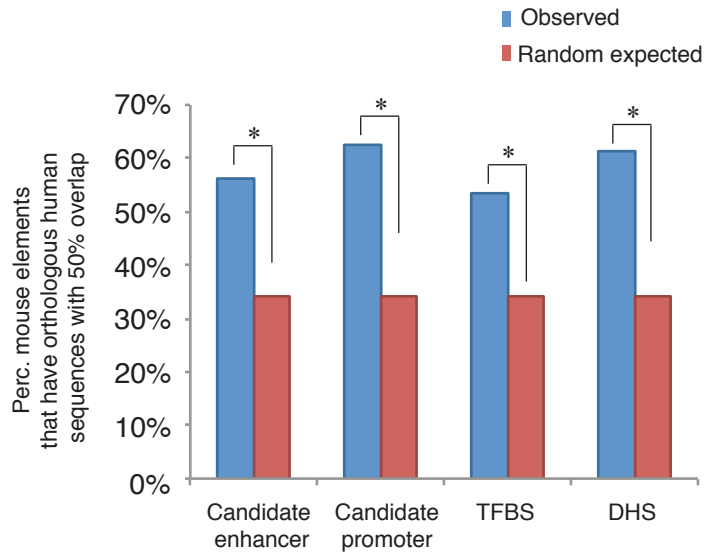

**Supplementary Figure 9: Conservation of predicted mouse cis regulatory elements in the human genome.** To define the orthologous sequences for the mouse cis regulatory elements in the human genome, we used program bnMapper and the reciprocal chained blastz alignments. For the random control, we generate same amount of reads with the same genomic coverage and run bnMapper with the same parameter. We run the simulations 100 times and took the average. For more details, please refer to the supplementary method section. \* indicates  $P < 2.2E-16$  by chi-squared test.



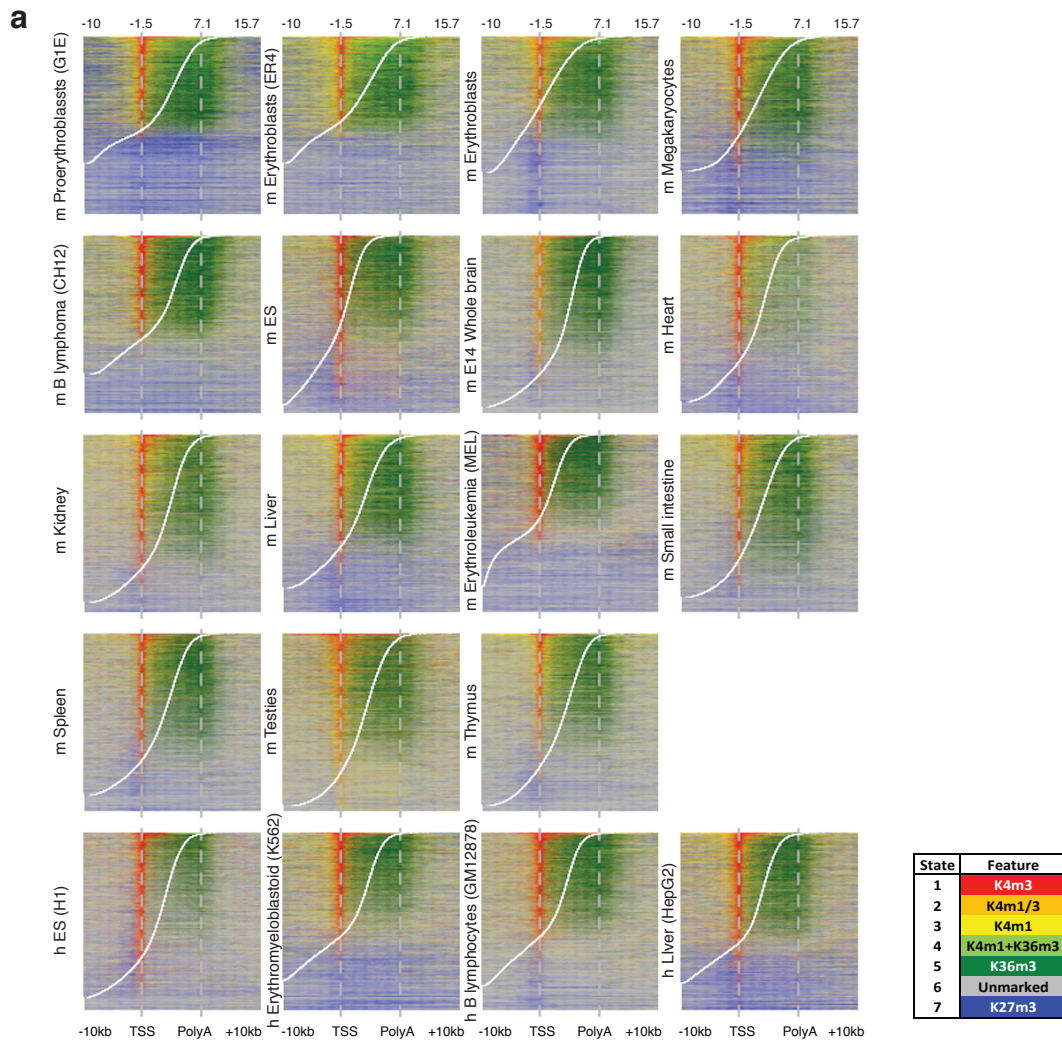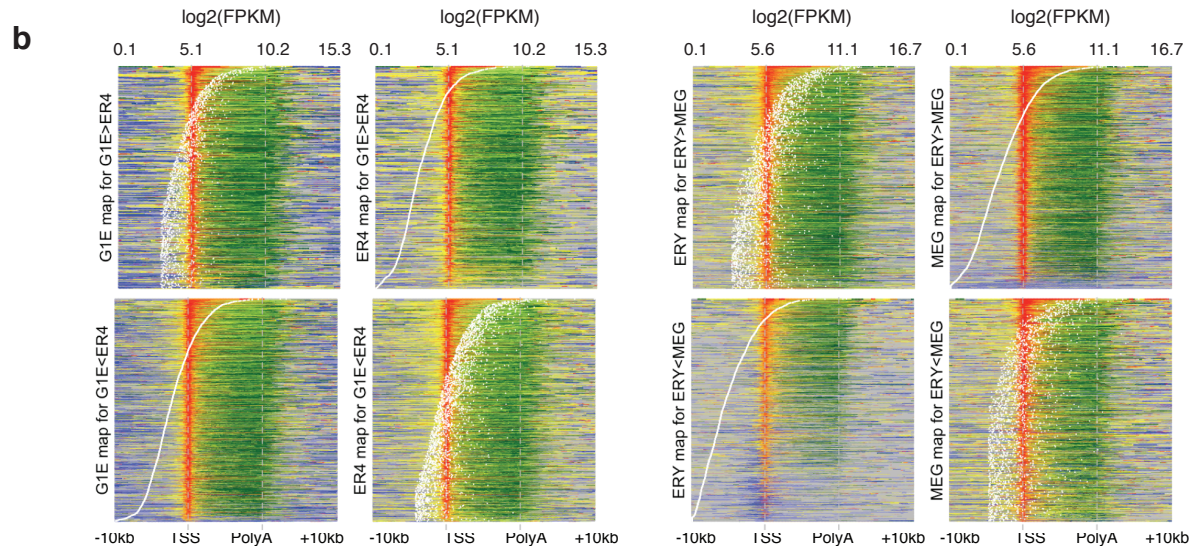

**Supplementary Figure 10: Distribution of chromatin states around the orthologous genes in the human and mouse tissue and cell types. a**, Heat maps displaying the distribution of the chromatin states over the neighborhoods of human-mouse one-to-one orthologous genes in 15 mouse cell lines/tissues and three human cell lines. The gene neighborhood intervals were sorted by the transcription levels of the genes in the corresponding cell type, which were shown by white dots. **b**, Distribution of chromatin states in differentially expressed genes. From all the human-mouse one-to-one orthologs, the differentially expressed genes were identified between G1E and ER4 (left panel) and between ERY and MEG (right panel).

|          | Raw Coefficient |       |       |       |         |       |         |          |       |       |       |        |        |
|----------|-----------------|-------|-------|-------|---------|-------|---------|----------|-------|-------|-------|--------|--------|
|          | ER4             | MEL   | K562  | CH12  | GM12878 | mES   | H1-hESC | W. brain | NH-A  | Liver | HepG2 | Testis | NT2-D1 |
| ER4      |                 | 0.76  | 0.59  | 0.70  | 0.62    | 0.64  | 0.51    | 0.65     | 0.50  | 0.63  | 0.56  | 0.70   | 0.62   |
| MEL      | 0.26            |       | 0.57  | 0.66  | 0.61    | 0.60  | 0.47    | 0.61     | 0.49  | 0.59  | 0.49  | 0.63   | 0.54   |
| K562     | 0.17            | 0.21  |       | 0.58  | 0.68    | 0.58  | 0.66    | 0.57     | 0.67  | 0.54  | 0.68  | 0.57   | 0.69   |
| CH12     | 0.03            | 0.05  | 0.10  |       | 0.64    | 0.64  | 0.52    | 0.66     | 0.51  | 0.64  | 0.57  | 0.67   | 0.63   |
| GM12878  | 0.09            | 0.15  | -0.11 | 0.11  |         | 0.62  | 0.68    | 0.65     | 0.69  | 0.60  | 0.64  | 0.63   | 0.72   |
| mES      | -0.30           | -0.16 | -0.08 | -0.17 | -0.17   |       | 0.69    | 0.80     | 0.63  | 0.70  | 0.58  | 0.74   | 0.71   |
| H1-hESC  | -0.23           | -0.17 | -0.34 | -0.20 | -0.28   | 0.23  |         | 0.71     | 0.79  | 0.59  | 0.69  | 0.62   | 0.82   |
| W. brain | -0.38           | -0.25 | -0.19 | -0.18 | -0.15   | 0.23  | 0.26    |          | 0.68  | 0.74  | 0.59  | 0.79   | 0.74   |
| NH-A     | -0.21           | -0.04 | -0.27 | -0.16 | -0.23   | 0.08  | 0.06    | 0.17     |       | 0.60  | 0.69  | 0.59   | 0.77   |
| Liver    | -0.34           | -0.18 | -0.07 | -0.14 | -0.09   | -0.02 | 0.03    | 0.01     | 0.11  |       | 0.59  | 0.70   | 0.63   |
| HepG2    | 0.07            | -0.04 | -0.12 | 0.08  | -0.29   | -0.06 | -0.28   | -0.12    | -0.22 | 0.10  |       | 0.57   | 0.73   |
| Testis   | -0.11           | -0.13 | -0.03 | -0.11 | -0.05   | 0.06  | 0.07    | 0.14     | 0.00  | -0.11 | -0.04 |        | 0.68   |
| NT2-D1   | 0.03            | -0.18 | -0.32 | 0.01  | -0.21   | 0.07  | 0.06    | 0.14     | -0.18 | -0.07 | -0.20 | 0.06   |        |

Normalized Coefficient

**Supplementary Figure 11: Correlation of unmarked state proportion in neighborhood of human-mouse 1:1 ortholog genes across tissue/cell types.** In each of the ortholog genes, chromatin state was observed on 150 positions over the neighborhood region, and the number of positions that fell in unmarked state was count in each tissue/cell type. The coefficients of Person correlation of these counts between tissue/types were computed and displayed on the right part of the table. The correlation strength is colored in grey scale. In addition, a normalization approach was applied between species. In this approach, the average of each gene's unmarked position counts was calculated within mouse group and human group separately, and then was subtracted from the count in each of the tissue/cell types in each group respectively. The correlation coefficients from these normalized counts are displayed in the left part of the table, in which yellow-light green-green coloring represents increasing correlation coefficient.

**a**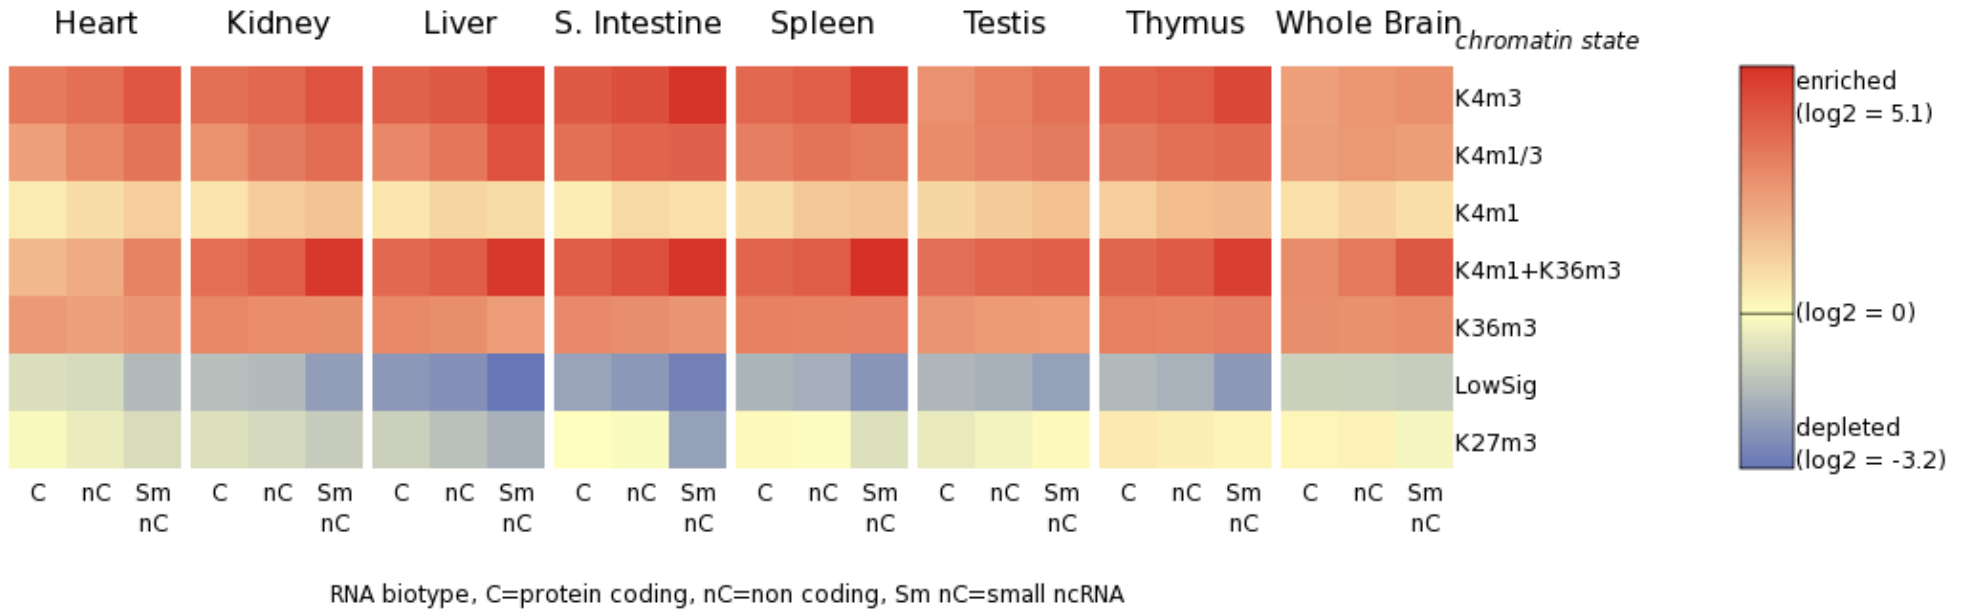**b**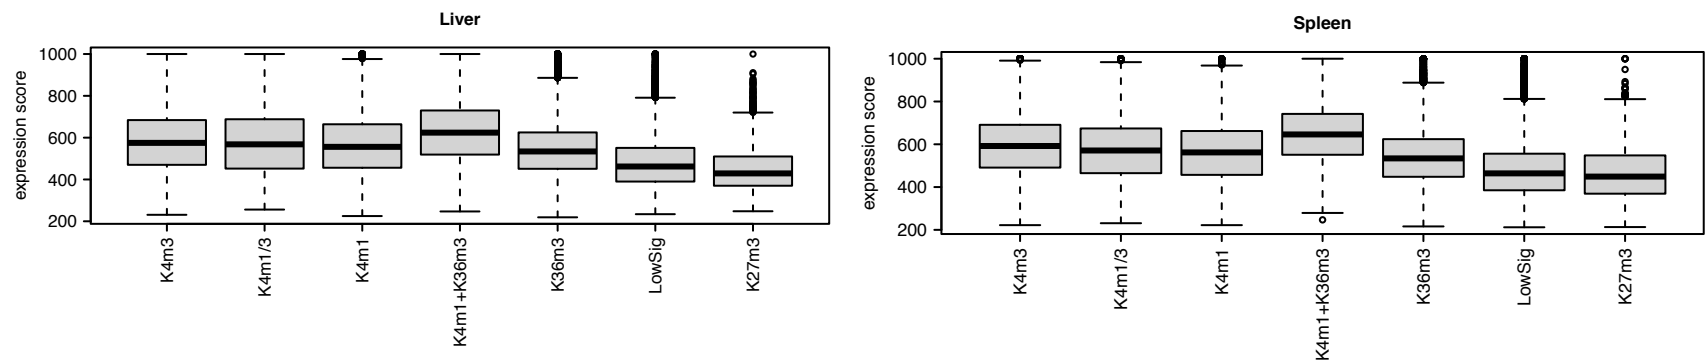

**Supplementary Figure 12: Distribution of various classes of transcript in the segmentations.** **a**, Enrichment (red) or depletion (blue) of RNA-seq transcript categories (“RNA biotypes”) in each state for eight segmentations. **b**, Distribution of expression levels in segmentation states. The level of expression of each protein-coding RNA-seq contig intersecting a protein-coding gene in each state for liver and spleen segmentations was extracted, and the distribution of those values for each state is shown in the box plot.

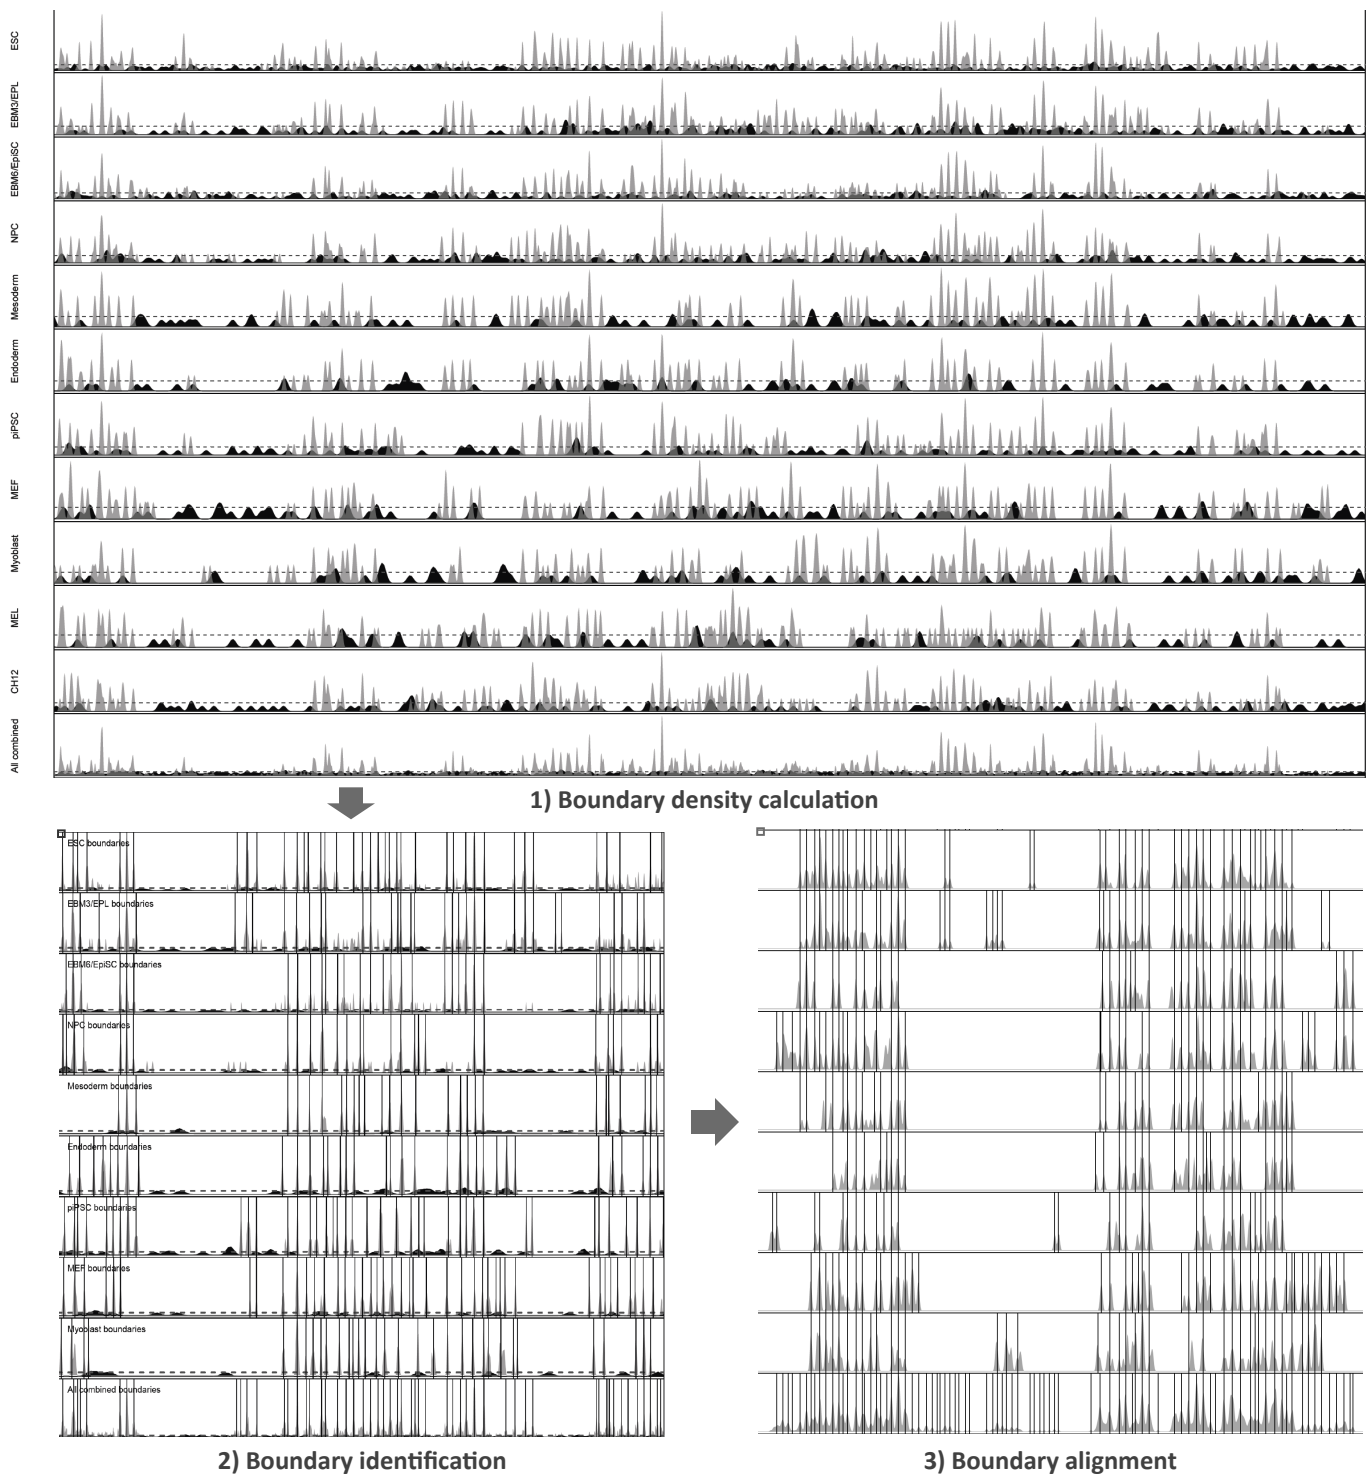

**Supplementary Figure 13. Alignment of replication boundary positions across cell types.** For each cell type, the density of replication boundary positions (early and late borders of timing transition regions) are calculated. Boundary positions with significant alignment in each cell type are then identified as shown in Figure 1B and Figure S1, and their positions identified from the local maxima of the boundary densities, and aligned as follows: 1) all positions are put into a sorted vector, 2) differences in position are calculated between each neighboring boundary, 3) the position vector is divided at the largest gap, 4) repeat step 3 until i) differences in peak positions with the bin mean are below 50kb tolerance, or ii) each bin contains a single peak (adapted from MALDIquant methods).



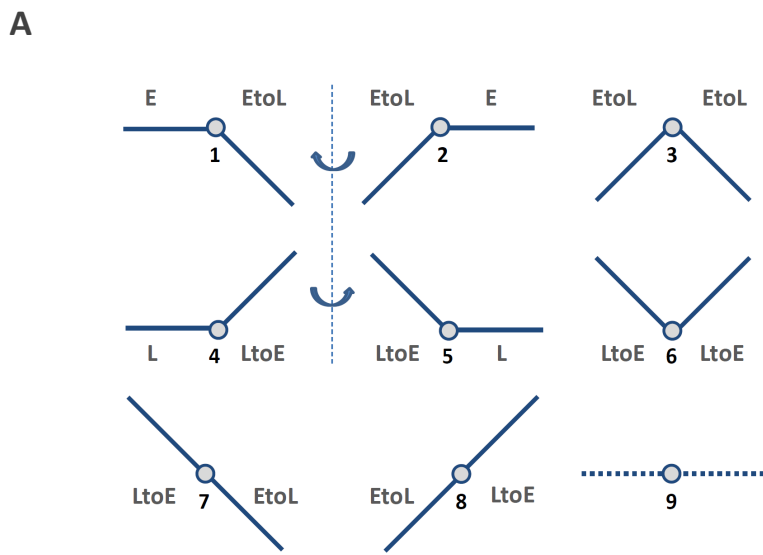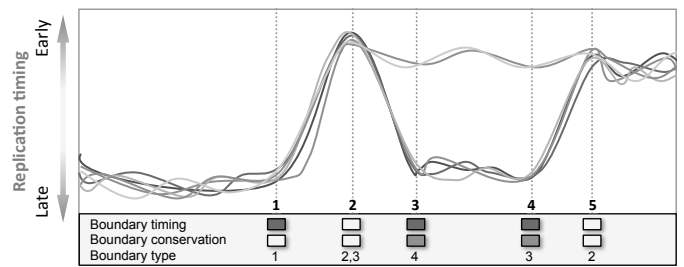

**Boundary Classes:**

- (1) Relatively early left, early-to-late TTR right
- (2) Early-to-late TTR left, relatively early right
- (3) Early-to-late TTR to left and right
- (4) Relatively late left, late-to-early TTR right
- (5) Late-to-early TTR left, relatively late right
- (6) Late-to-early TTR to left and right
- (7) Early-to-late TTR to left and right
- (8) Late-to-early TTR to left and right
- (9) No clear TTR to either side

**B**

**Human cell types**

| Class | ESC  | NPC  | HeLa-S3 | IMR90 | GM06990 | Endomesoderm | Endoderm | Mesoderm | Smooth muscle | All combined |
|-------|------|------|---------|-------|---------|--------------|----------|----------|---------------|--------------|
| 1     | 540  | 465  | 332     | 357   | 419     | 384          | 432      | 332      | 414           | 555          |
| 2     | 552  | 485  | 330     | 346   | 410     | 401          | 443      | 371      | 409           | 596          |
| 3     | 510  | 263  | 347     | 289   | 228     | 581          | 324      | 337      | 154           | 427          |
| 4     | 637  | 506  | 356     | 416   | 455     | 494          | 485      | 446      | 439           | 631          |
| 5     | 621  | 485  | 355     | 421   | 431     | 476          | 451      | 437      | 455           | 602          |
| 6     | 434  | 213  | 335     | 239   | 210     | 484          | 314      | 261      | 143           | 390          |
| 7     | 66   | 40   | 51      | 44    | 44      | 67           | 79       | 70       | 72            | 107          |
| 8     | 79   | 51   | 63      | 45    | 33      | 74           | 85       | 90       | 84            | 110          |
| 9     | 807  | 203  | 102     | 94    | 108     | 113          | 145      | 122      | 197           | 1255         |
| NA's  | 1620 | 3155 | 3595    | 3615  | 3528    | 2792         | 3108     | 3400     | 3499          | 1193         |

**Mouse cell types**

| Class | ESC  | EBM3/EPL | EBM6/EpiSC | NPC  | Mesoderm | Endoderm | piPSC | MEF  | Myoblast | MEL  | CH12 | All combined |
|-------|------|----------|------------|------|----------|----------|-------|------|----------|------|------|--------------|
| 1     | 445  | 406      | 400        | 435  | 277      | 304      | 320   | 286  | 305      | 303  | 376  | 492          |
| 2     | 441  | 405      | 405        | 437  | 302      | 303      | 344   | 314  | 302      | 291  | 376  | 475          |
| 3     | 506  | 497      | 478        | 358  | 512      | 471      | 519   | 429  | 360      | 478  | 206  | 512          |
| 4     | 507  | 463      | 454        | 471  | 378      | 396      | 441   | 391  | 392      | 411  | 409  | 571          |
| 5     | 523  | 472      | 437        | 456  | 339      | 375      | 426   | 373  | 366      | 413  | 415  | 553          |
| 6     | 428  | 426      | 441        | 314  | 453      | 386      | 395   | 317  | 253      | 328  | 151  | 434          |
| 7     | 48   | 70       | 58         | 41   | 55       | 53       | 53    | 78   | 61       | 40   | 44   | 98           |
| 8     | 51   | 77       | 57         | 62   | 60       | 67       | 62    | 79   | 79       | 41   | 56   | 95           |
| 9     | 497  | 265      | 400        | 371  | 105      | 87       | 144   | 87   | 113      | 87   | 263  | 1090         |
| NA's  | 1924 | 2289     | 2240       | 2425 | 2889     | 2928     | 2666  | 3016 | 3139     | 2978 | 3074 | 1050         |

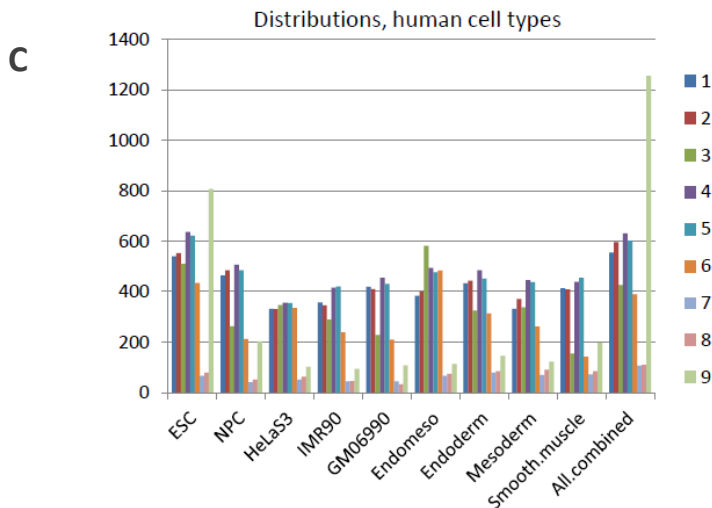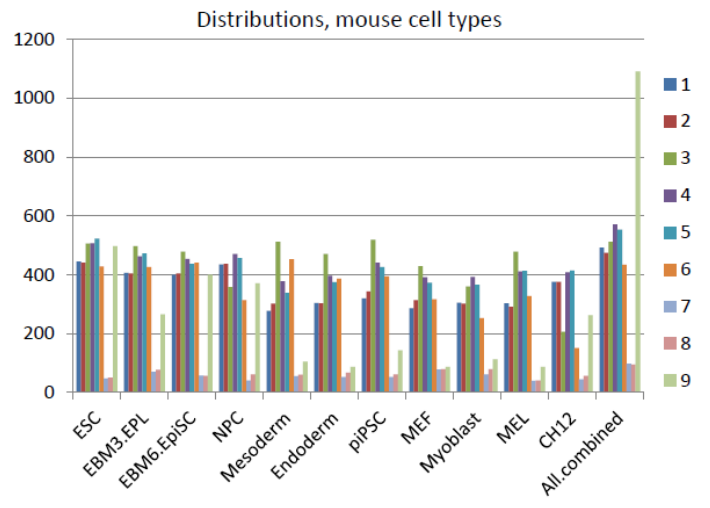

**Supplementary Figure 14: Definitions and distributions of boundary classes.** After alignment between cell types (Supplementary Fig. 13), boundaries were further classified into nine categories **a**, according to the orientation of TTRs to either side of each boundary. Consolidation occurs preferentially in classes 3 and 6, which harbor especially small early and late domains with a single boundary. Analysis was focused on class 1 through 6 boundaries since 7-9 are most likely to be false boundary calls. Also, since consensus boundary positions do not precisely align with boundary positions in each individual cell type, the absolute timing transition between early and late boundaries occasionally dropped below the threshold for defining a TTR, resulting in a more stringent filtering of a small fraction of boundaries for preservation and conservation analysis. **b** and **c**, Number of RT boundaries present among the set of all aligned boundary positions for each boundary class and cell type shown.



### Mouse conserved 10/11 boundaries – class 1, n=76/396

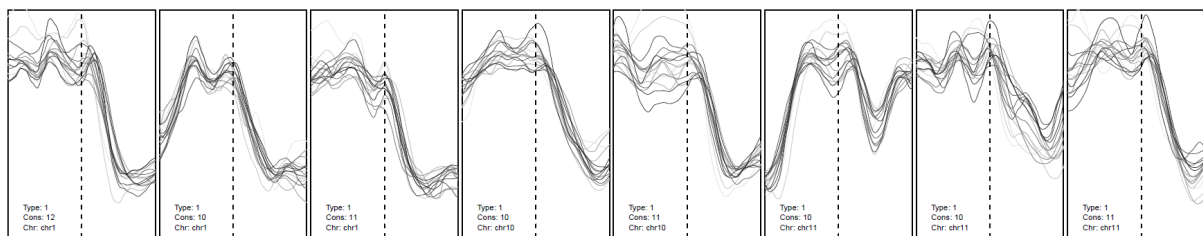

### Mouse conserved 10/11 boundaries – class 2, n=73/396

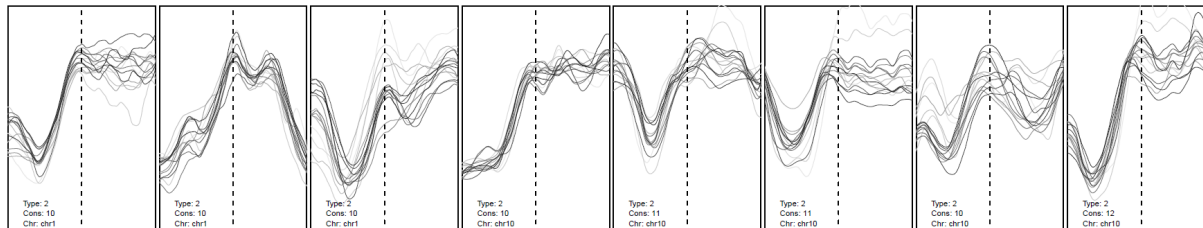

### Mouse conserved 10/11 boundaries – class 3, n=80/396

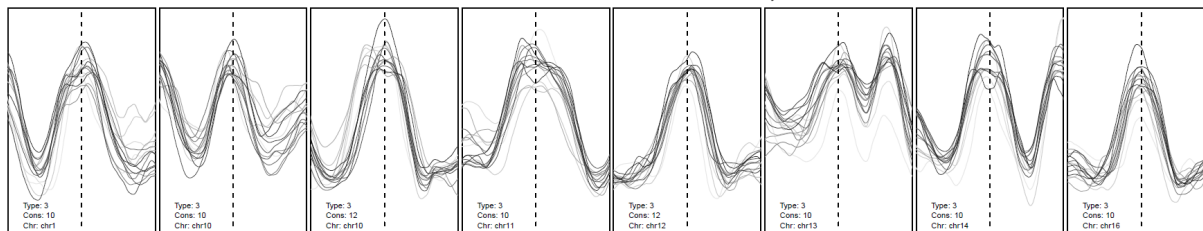

### Mouse conserved 10/11 boundaries – class 4, n=104/396

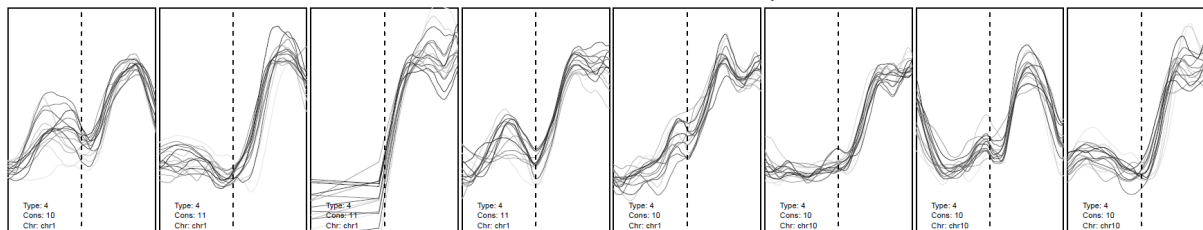

### Mouse conserved 10/11 boundaries – class 5, n=95/396

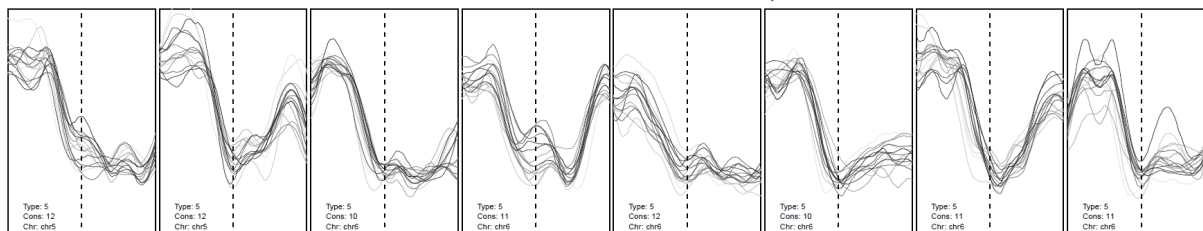

### Mouse conserved 10/11 boundaries – class 6, n=22/396

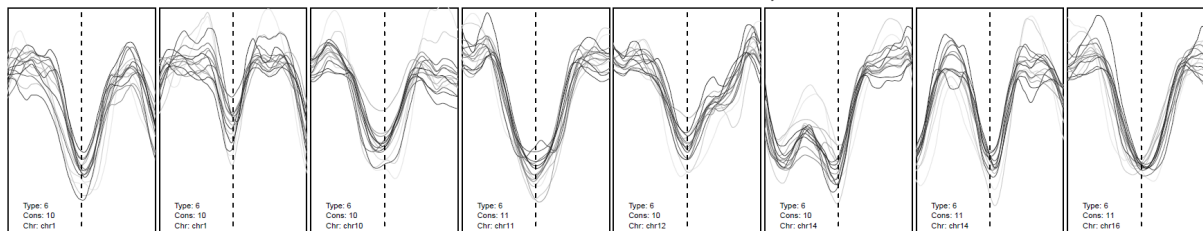

**Supplementary Figure 15: Examples of conserved boundaries of each class.** Replication timing profiles for all mouse cell types are plotted for the first eight examples of conserved boundaries (those found with the same orientation and position in 10/11 cell types) for classes 1:6.

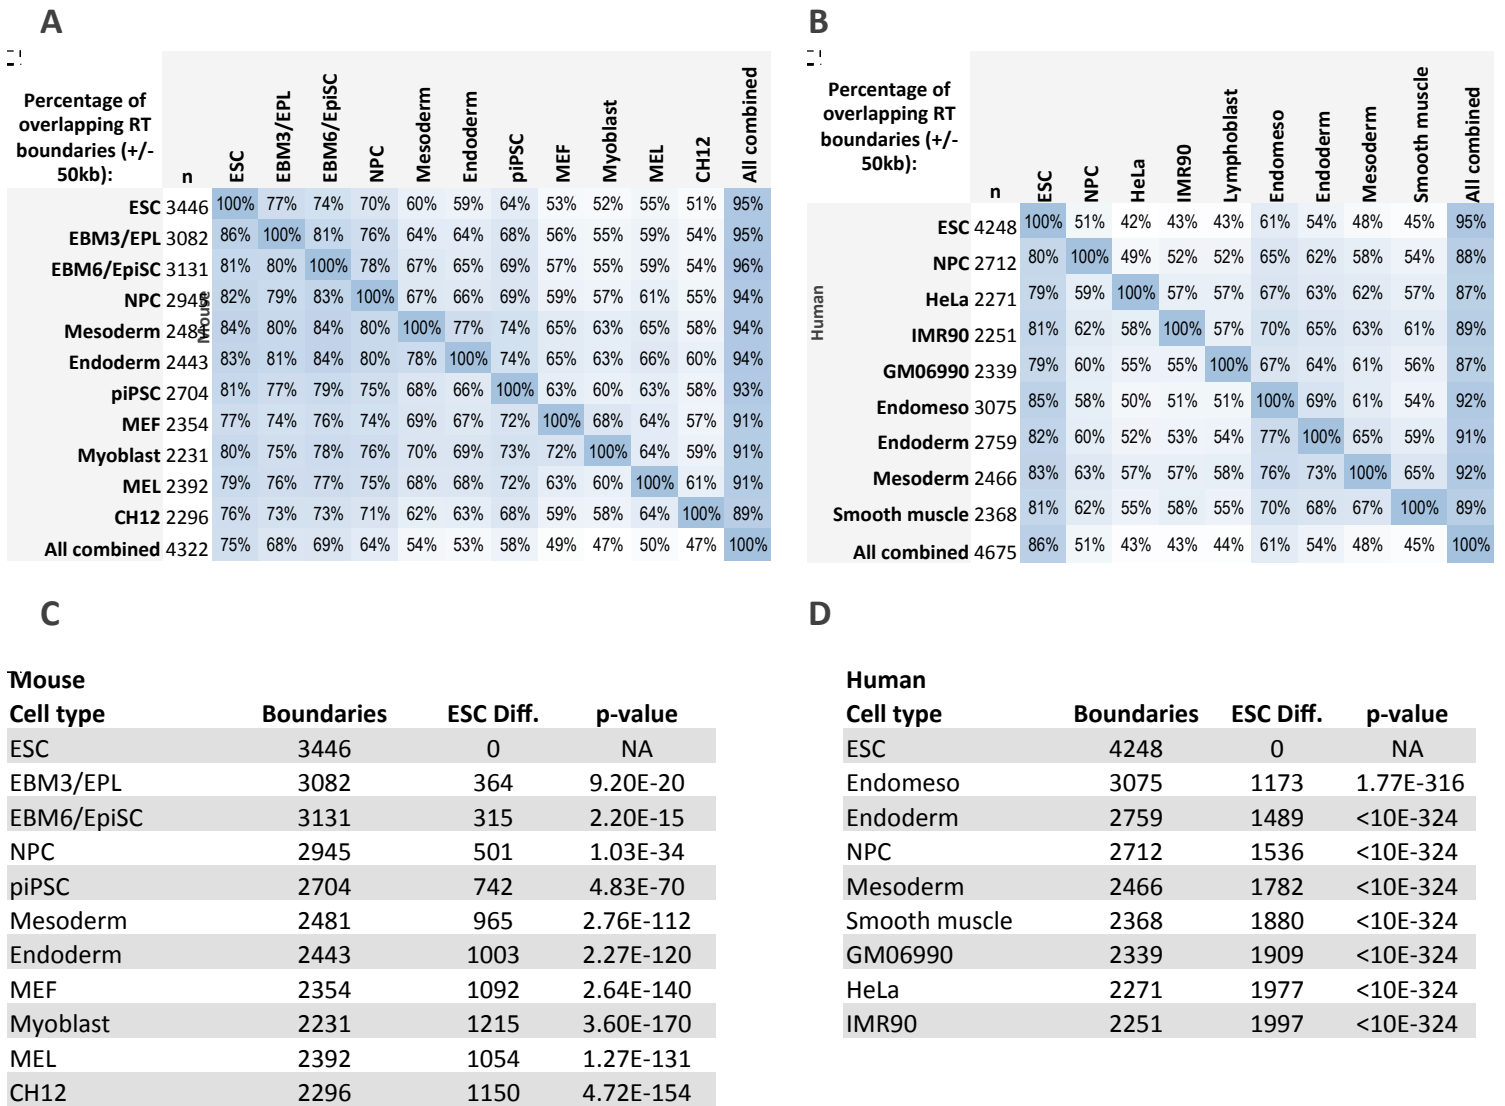

**Supplementary Figure 16: Mouse and Human Boundary Comparisons and Effect of Domain Consolidation During Development.** Pairwise percentage of boundaries conserved between cell types in mouse (a) and human (b) as a fraction of the number of boundaries in each type, with comparisons from rows to columns. Fewer boundaries are shared between widely divergent cell types (e.g., hESCs to HeLa; 42%) than those in similar states or differentiation intermediates (mESC->EBM3->EBM6->NPC; 77-81%). Note that the fact that only 13% of domain boundaries are constitutive does not contradict constitutive replication timing of approximately 50% of the genome, since constitutively replicated domains can be flanked by developmentally regulated boundaries depending on the RT of their neighboring domains (e.g. boundaries 2 and 5 in Supplementary Figure 14a). (c, d) Significance of boundary number reduction from hESCs, mESCs. Consolidation was predominantly found for small domains detected as a single boundary with timing transitions to both sides (classes 3 and 6 in Supplementary Figure 14a).

|           | RT:HeLa_ES3 | RT:GM06990 |                | RT:HeLa_ES3 |
|-----------|-------------|------------|----------------|-------------|
|           |             |            | <b>GM12878</b> |             |
| H1 hESC   |             | 1.00       | RT.GM06990     |             |
| RT.H1ESC  | 1.00        | 0.71       | DNaseRep1      | 0.71        |
| Rbbp5     | 0.62        | 0.69       | DNaseRep2      | 0.69        |
| Chd1      | 0.60        | 0.67       | H3k4me1        | 0.67        |
| DNaseRep1 | 0.60        | 0.67       | Znf14          | 0.67        |
| H3k4me1   | 0.57        | 0.65       | H3k4me3        | 0.65        |
| H3k9ac    | 0.55        | 0.64       | H3k4me2        | 0.64        |
| Hdac2     | 0.55        | 0.64       | Stat1          | 0.64        |
| H3k4me2   | 0.55        | 0.64       | Smc3           | 0.64        |
| Sin3      | 0.54        | 0.64       | H2az           | 0.64        |
| Ezh2      | 0.54        | 0.63       | Ctcf           | 0.63        |
| Gtf2f1    | 0.53        | 0.63       | Ctcf           | 0.63        |
| H3k27ac   | 0.53        | 0.63       | Mazab          | 0.63        |
| Chd7      | 0.53        | 0.62       | Bhlhe40        | 0.62        |
| Tbp       | 0.51        | 0.61       | H3k27ac        | 0.61        |
| Znf143    | 0.50        | 0.61       | Whip           | 0.61        |
| Mxi1      | 0.50        | 0.61       | Max            | 0.61        |
| Chd2      | 0.50        | 0.61       | Ebf1           | 0.61        |
| Jund      | 0.50        | 0.60       | Tblr1          | 0.61        |
| Ctcf      | 0.48        | 0.58       | Corest         | 0.60        |
| Bach1     | 0.48        | 0.58       | Mxi1           | 0.58        |
| Sap3      | 0.47        | 0.58       | Chd2           | 0.58        |
| Jmjd2a    | 0.47        | 0.57       | Ezh2           | 0.57        |
| H3k4me3   | 0.47        | 0.56       | H3k9ac         | 0.57        |
| P300      | 0.47        | 0.56       | Usf2           | 0.56        |
| Phf8      | 0.46        | 0.56       | Znf3           | 0.56        |
| H4k20me1  | 0.45        | 0.55       | Elk1           | 0.55        |
| Cmyc      | 0.45        | 0.55       | Nrf1           | 0.55        |
| Rad21     | 0.45        | 0.53       | P300b          | 0.53        |
| Usf2      | 0.45        | 0.53       | Rfx5200401194  | 0.53        |
| Jarid1a   | 0.43        | 0.52       | P300           | 0.52        |
| Sirt6     | 0.40        | 0.52       | Chd1a301218a   | 0.52        |
| H3k36me3  | 0.39        | 0.50       | P300           | 0.50        |
| Cebp      | 0.38        | 0.50       | Tbp            | 0.50        |
| Brca1     | 0.36        | 0.49       | Cdp            | 0.49        |
| Chd1      | 0.36        | 0.48       | Pol2s2         | 0.48        |
| Suz12     | 0.35        | 0.48       | Rad21          | 0.48        |
| Nrf1      | 0.34        | 0.48       | Pol2           | 0.48        |
| Hdac6     | 0.34        | 0.47       | Nfyb           | 0.47        |
| Plu1      | 0.30        | 0.46       | Sin3           | 0.46        |
| Rfx5      | 0.29        | 0.43       | Stat3          | 0.43        |
| H3k27me3  | 0.28        | 0.42       | H4k20me1       | 0.42        |
| H3k79me2  | 0.27        | 0.41       | Brca1          | 0.41        |
| Cjun      | 0.24        | 0.40       | H3k9me3        | 0.40        |
| Mafk      | 0.14        | 0.40       | Nfe2           | 0.40        |
| H2az      | -0.04       | 0.39       | Ikzf1          | 0.39        |
| H3k9me3   | -0.06       | 0.33       | E2f4           | 0.33        |
|           |             | 0.32       | Irf3           | 0.32        |
|           |             | 0.32       | H3k79me2       | 0.32        |
|           |             | 0.28       | Erra           | 0.28        |
|           |             | 0.25       | H3k36me3       | 0.25        |
|           |             | 0.25       | Nfkb           | 0.25        |
|           |             | 0.21       | Srebp1         | 0.21        |
|           |             | 0.19       | Gcn5           | 0.19        |
|           |             | 0.18       | Jund           | 0.18        |
|           |             | 0.16       | H3k27me3       | 0.16        |
|           |             | 0.16       | Nfya           | 0.16        |
|           |             | 0.12       | Srebp2         | 0.12        |
|           |             | 0.12       | Tr4            | 0.12        |
|           |             | 0.08       | Yy1            | 0.08        |
|           |             | 0.06       | Spt20          | 0.06        |
|           |             | -0.01      | Mafk           | -0.01       |
|           |             | -0.07      | Zzz3           | -0.07       |
|           |             |            |                |             |
|           |             |            | <b>HeLa</b>    |             |
|           |             |            | RT.HeLa_ES3    | 1.00        |
|           |             |            | Cebp           | 0.66        |
|           |             |            | Smc3           | 0.66        |
|           |             |            | Rad21          | 0.63        |
|           |             |            | DNaseRep2      | 0.63        |
|           |             |            | DNaseRep1      | 0.62        |
|           |             |            | Corest         | 0.61        |
|           |             |            | Rfx5           | 0.61        |
|           |             |            | Usf2           | 0.60        |
|           |             |            | H3k4me1        | 0.60        |
|           |             |            | Max            | 0.59        |
|           |             |            | H3k4me2        | 0.58        |
|           |             |            | Ctcf           | 0.57        |
|           |             |            | Mafk           | 0.56        |
|           |             |            | Maz            | 0.55        |
|           |             |            | H3k4me3        | 0.55        |
|           |             |            | Chd2           | 0.54        |
|           |             |            | Mxi1           | 0.53        |
|           |             |            | Gtf2f1         | 0.52        |
|           |             |            | Brca1          | 0.52        |
|           |             |            | H3k27ac        | 0.52        |
|           |             |            | Znf143         | 0.52        |
|           |             |            | Zkscan1        | 0.51        |
|           |             |            | H3k9ac         | 0.51        |
|           |             |            | Pol2b          | 0.45        |
|           |             |            | Elk1           | 0.45        |
|           |             |            | H2az           | 0.44        |
|           |             |            | H3k79me2       | 0.41        |
|           |             |            | Tbp            | 0.41        |
|           |             |            | H4k20me1       | 0.41        |
|           |             |            | Pol2s2         | 0.38        |
|           |             |            | Jund           | 0.35        |
|           |             |            | Nfya           | 0.34        |
|           |             |            | P300           | 0.33        |
|           |             |            | Hcfc1          | 0.29        |
|           |             |            | Nfyb           | 0.29        |
|           |             |            | Stat3          | 0.28        |
|           |             |            | Ini1           | 0.27        |
|           |             |            | Cjun           | 0.24        |
|           |             |            | Prdm1          | 0.23        |
|           |             |            | Baf155         | 0.22        |
|           |             |            | H3k36me3       | 0.20        |
|           |             |            | Nrf1           | 0.11        |
|           |             |            | Tf3c110        | 0.08        |
|           |             |            | Rpc155         | 0.07        |
|           |             |            | Baf170         | 0.06        |
|           |             |            | Irf3           | 0.05        |
|           |             |            | H3k9me3        | -0.06       |
|           |             |            | Gcn5           | -0.06       |
|           |             |            | H3k27me3       | -0.06       |
|           |             |            | Ezh2           | -0.07       |
|           |             |            | Brf2           | -0.07       |
|           |             |            | Zzz3           | -0.14       |
|           |             |            | Bdp1           | -0.20       |
|           |             |            | Spt20          | -0.21       |
|           |             |            | Brf1           | -0.26       |

| RT vs. Mark Spearman correlation, 200kb windows | Mean R | H1hESC | HeLa  | GM06990 |
|-------------------------------------------------|--------|--------|-------|---------|
| DNase                                           | 0.64   | 0.60   | 0.63  | 0.69    |
| H3k4me1                                         | 0.61   | 0.57   | 0.67  | 0.60    |
| H3k4me2                                         | 0.59   | 0.55   | 0.64  | 0.58    |
| Znf143                                          | 0.56   | 0.50   | 0.52  | 0.67    |
| Ctcf                                            | 0.56   | 0.48   | 0.57  | 0.63    |
| H3k4me3                                         | 0.56   | 0.47   | 0.65  | 0.55    |
| H3k27ac                                         | 0.55   | 0.53   | 0.61  | 0.52    |
| Chd2                                            | 0.54   | 0.50   | 0.54  | 0.58    |
| Usf2                                            | 0.54   | 0.45   | 0.60  | 0.56    |
| Mxi1                                            | 0.54   | 0.50   | 0.53  | 0.58    |
| Rad21                                           | 0.52   | 0.45   | 0.63  | 0.48    |
| H3k9ac                                          | 0.51   | 0.55   | 0.57  | 0.41    |
| Rfx5                                            | 0.48   | 0.29   | 0.61  | 0.53    |
| Tbp                                             | 0.47   | 0.51   | 0.41  | 0.50    |
| P300                                            | 0.44   | 0.47   | 0.33  | 0.52    |
| Brca1                                           | 0.43   | 0.36   | 0.52  | 0.41    |
| H4k20me1                                        | 0.43   | 0.45   | 0.42  | 0.41    |
| Ezh2                                            | 0.35   | 0.54   | -0.07 | 0.57    |
| H2az                                            | 0.35   | -0.04  | 0.44  | 0.64    |
| Jund                                            | 0.34   | 0.50   | 0.35  | 0.18    |
| H3k79me2                                        | 0.33   | 0.27   | 0.32  | 0.41    |
| Nrf1                                            | 0.33   | 0.34   | 0.11  | 0.55    |
| H3k36me3                                        | 0.28   | 0.39   | 0.25  | 0.20    |
| Mafk                                            | 0.23   | 0.14   | 0.56  | -0.01   |
| H3k27me3                                        | 0.12   | 0.28   | 0.16  | -0.06   |
| H3k9me3                                         | 0.09   | -0.06  | 0.40  | -0.06   |

| ΔRT vs. ΔMark Spearman correlation, 200kb windows | Mean R | H1hESC vs. HeLa | H1hESC vs. GM06990 | HeLa vs. GM06990 |
|---------------------------------------------------|--------|-----------------|--------------------|------------------|
| DNase                                             | 0.33   | 0.31            | 0.26               | 0.42             |
| H3k4me1                                           | 0.31   | 0.29            | 0.26               | 0.38             |
| H3k27ac                                           | 0.31   | 0.31            | 0.27               | 0.35             |
| H3k4me2                                           | 0.30   | 0.27            | 0.27               | 0.36             |
| P300                                              | 0.29   | 0.32            | 0.20               | 0.36             |
| H3k9ac                                            | 0.26   | 0.25            | 0.25               | 0.29             |
| H3k4me3                                           | 0.26   | 0.23            | 0.23               | 0.32             |
| Tbp                                               | 0.23   | 0.24            | 0.21               | 0.25             |
| Chd2                                              | 0.22   | 0.22            | 0.20               | 0.26             |
| Znf143                                            | 0.19   | 0.16            | 0.19               | 0.23             |
| Rad21                                             | 0.19   | 0.25            | 0.13               | 0.20             |
| Mxi1                                              | 0.19   | 0.19            | 0.17               | 0.22             |
| Jund                                              | 0.19   | 0.26            | 0.11               | 0.20             |
| Usf2                                              | 0.18   | 0.18            | 0.15               | 0.21             |
| Ctcf                                              | 0.17   | 0.16            | 0.17               | 0.19             |
| H3k36me3                                          | 0.17   | 0.16            | 0.16               | 0.18             |
| Rfx5                                              | 0.15   | 0.12            | 0.10               | 0.22             |
| Brca1                                             | 0.15   | 0.14            | 0.11               | 0.19             |
| H2az                                              | 0.14   | 0.00            | 0.11               | 0.30             |
| Nrf1                                              | 0.13   | 0.11            | 0.10               | 0.18             |
| Ezh2                                              | 0.12   | 0.09            | 0.22               | 0.06             |
| H3k79me2                                          | 0.10   | 0.06            | 0.18               | 0.07             |
| Mafk                                              | 0.10   | 0.11            | 0.08               | 0.10             |
| H3k9me3                                           | 0.10   | 0.01            | 0.15               | 0.13             |
| H4k20me1                                          | -0.02  | -0.07           | 0.11               | -0.11            |
| H3k27me3                                          | -0.03  | -0.05           | 0.04               | -0.08            |

**Supplementary Figure 17: Comparison of chromatin features to RT.** Spearman correlations between chromatin features mapped in specific cell types and RT. The bottom right panel is an expanded version of Fig. 7I, to show the remaining changes in RT vs. changes in other chromatin features mapped in common between the indicated cell types.

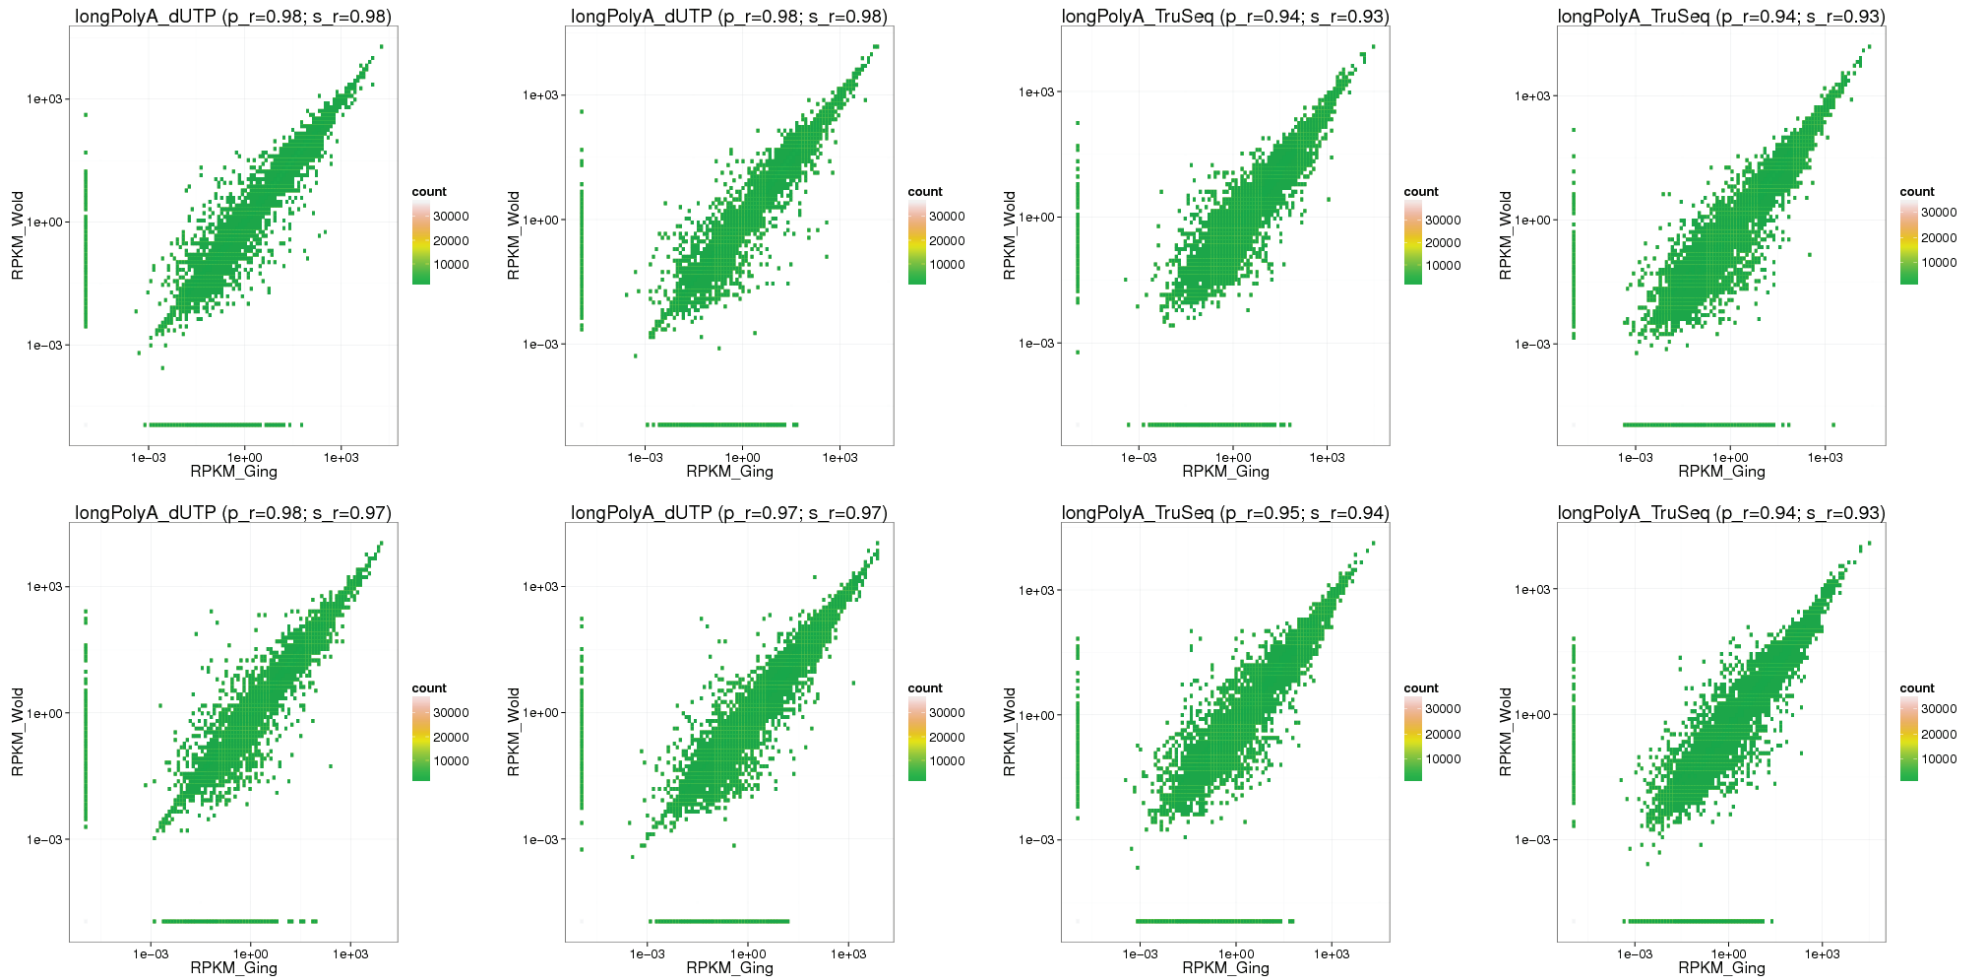

**Supplementary Figure 18: The joint distribution of the expression (computed in RPKM by the flux capacitor program) of human genes based on long polyA+ RNaseq data, when mapping is done with the STAR mapper (x axis) versus with the TopHat mapper (y axis). The different plots represent different RNaseq library protocols (dUTP, TruSeq), different cell lines (K562, GM12878) and different bioreplicates.**

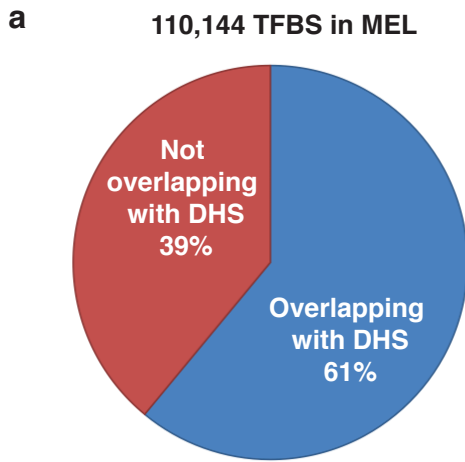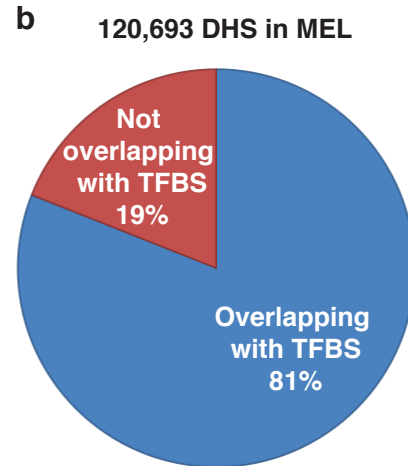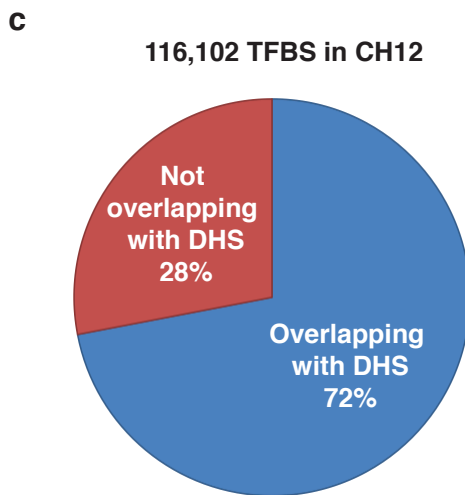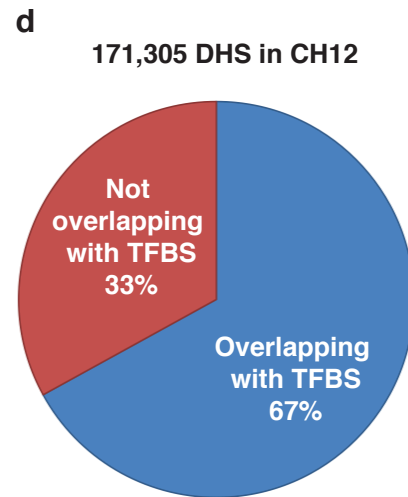

**Supplementary Figure 19: Comparison of DHS sites with TFBS in CH12 and MEL.** First we merged all the binding sites from different transcription factors in the same cell line (33 TFs in CH12 and 43 TFs in MEL), and compared the union of the binding sites with DHS in the same cell type. We found 61% and 72% of TFBS in MEL and CH12 overlap with DHS, and 81% and 67% of DHS in MEL and CH12 overlap with TFBS in the same cell type.



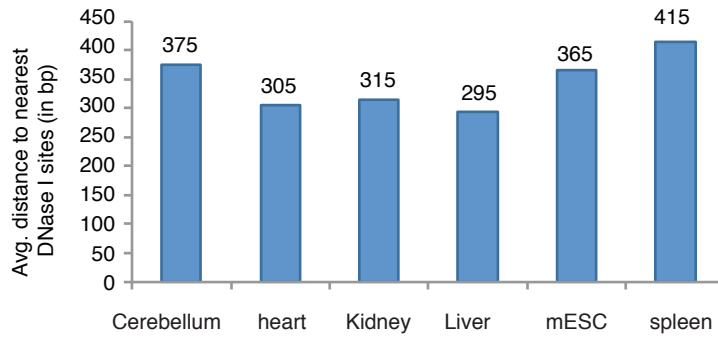

**Supplementary Figure 20: Median distance between candidate enhancers based histone modifications to nearest DHS sites is around 300 - 400 bp.**

**a**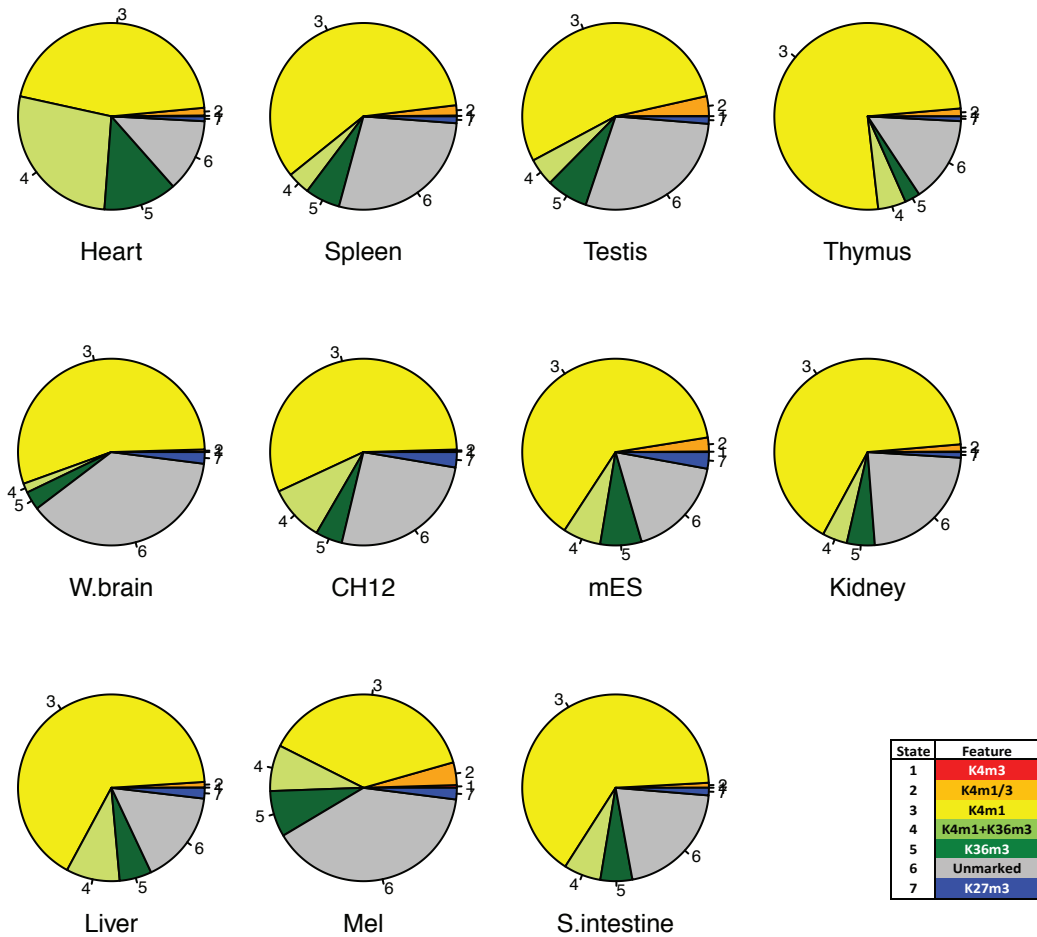**b**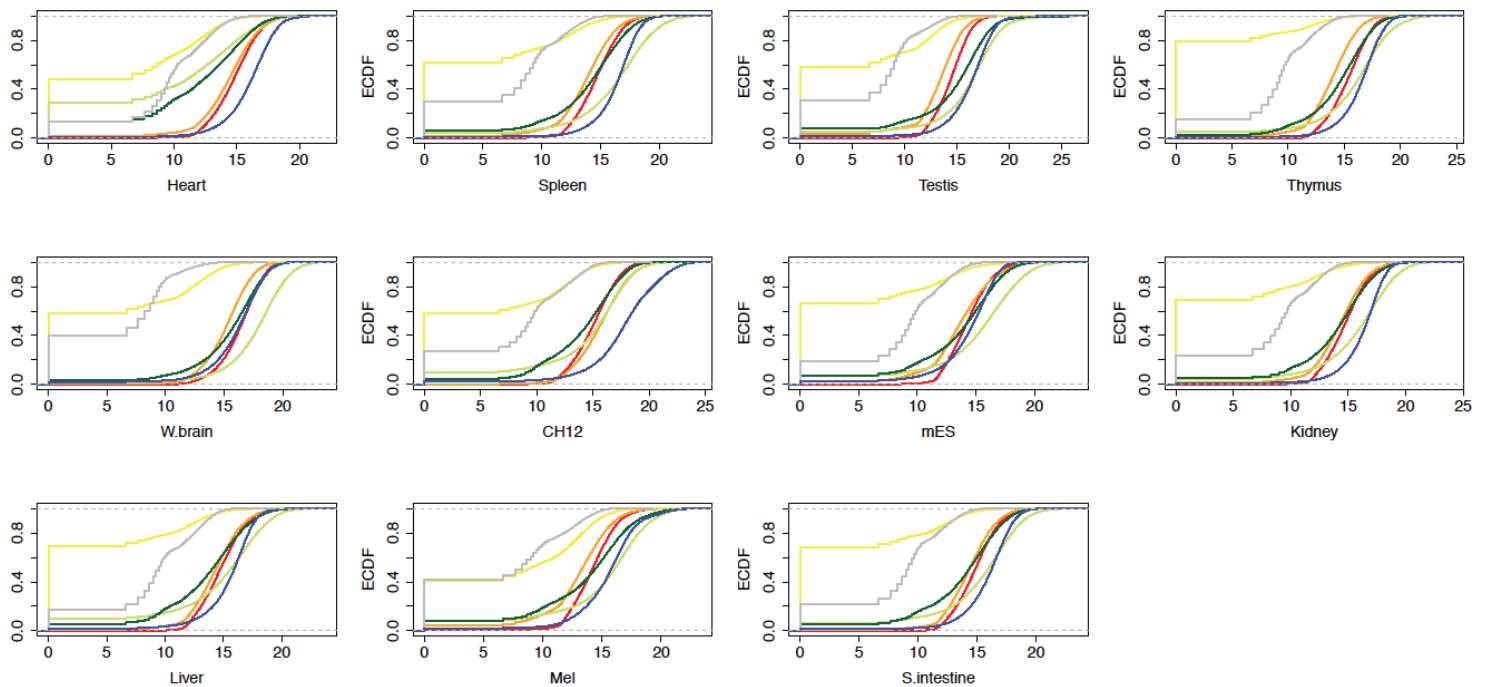

**Supplementary Figure 21: Comparison between chromHMM states with candidate enhancers. a.** Significant overlap between predicted enhancers and H3k4me1 state from chromHMM segmentation. The closest or overlapping chromHMM state was identified for each of the predicted enhancers. The proportion of the states for each tissue/cell type is shown as a piechart. **b.** Relationship between predicted enhancers and chromHMM states in locations. For each of the predicted enhancers, the closest distance to each of the seven chromHMM states was computed and displayed by empirical cumulative distribution

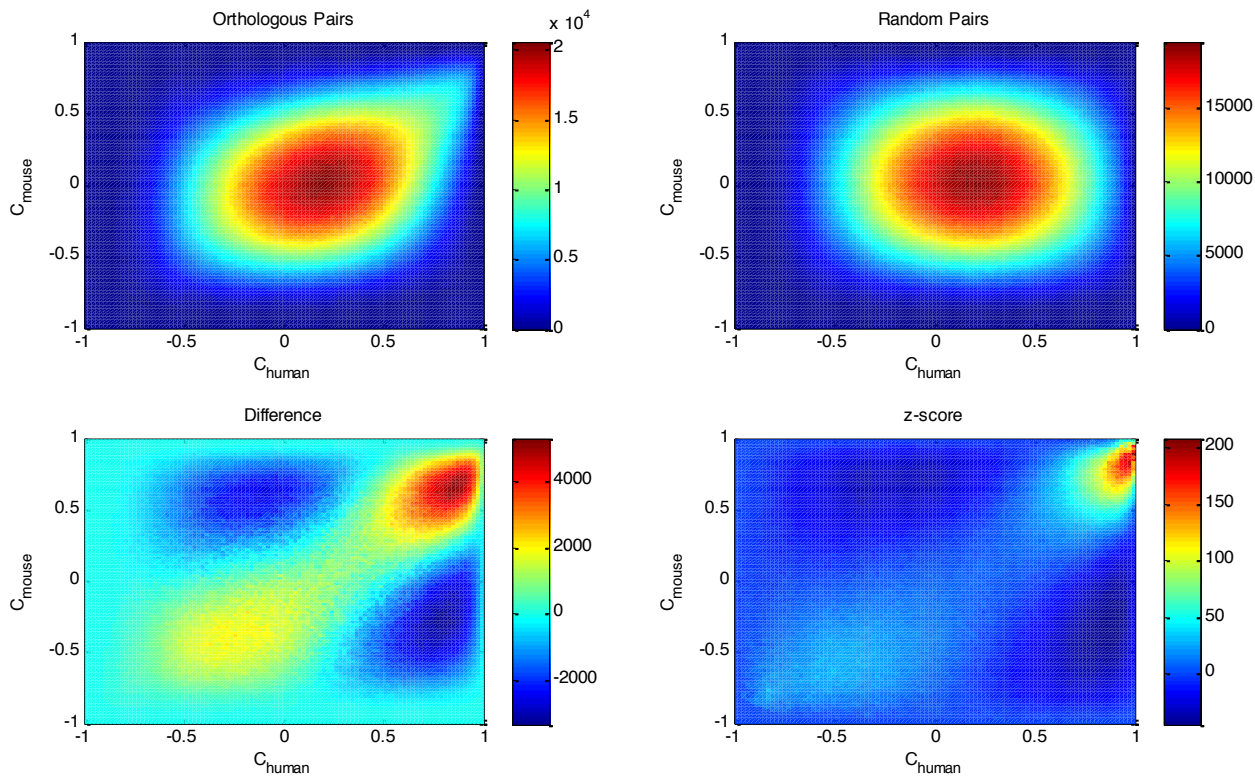

**Supplementary Figure 22: Analysis of conserved co-expression of gene pairs in the human and mouse genomes.** For the set of human genes with mouse orthologs, we calculated the correlation between every pair of human genes separately across all human samples ( $C_{\text{human}}$ ) and the correlation of the orthologs of the pair across all mouse tissues ( $C_{\text{mouse}}$ ) and plot the joint distribution of these quantities in (a). The tilt of this distribution quantifies the conserved coexpression of all orthologous gene pairs. For a negative control, for each pair of human genes we chose a random pair of mouse genes (b), the Z-score for the differences between the actual and control distributions in (d) shows a statistically significant tendency for both correlated and anti-correlated expression patterns to be preserved between species.

**Supplementary Table 1: Experimental datasets used in the current study.**

|                       | # of tissue or cell lines | # of experiments | # of data sets |
|-----------------------|---------------------------|------------------|----------------|
| Histone modifications | 33                        | 157              | 310            |
| Transcription factor  | 29                        | 109              | 299            |
| RNA-Seq               | 69                        | 104              | 193            |
| Dnase-Seq             | 53                        | 53               | 123            |
| Replication timing    | 18                        | 18               | 33             |
| ChIP controls         | 34                        | 36               | 108            |
| Total                 | 123                       | 477              | 1066           |



| Excretory system               |  |  |  |  |  |  |  |  |  |  |  |  |  |  |  |  |  |  |  |  |  |  |  |
|--------------------------------|--|--|--|--|--|--|--|--|--|--|--|--|--|--|--|--|--|--|--|--|--|--|--|
| Bladder                        |  |  |  |  |  |  |  |  |  |  |  |  |  |  |  |  |  |  |  |  |  |  |  |
| Kidney                         |  |  |  |  |  |  |  |  |  |  |  |  |  |  |  |  |  |  |  |  |  |  |  |
| Patski                         |  |  |  |  |  |  |  |  |  |  |  |  |  |  |  |  |  |  |  |  |  |  |  |
| Endocrine system               |  |  |  |  |  |  |  |  |  |  |  |  |  |  |  |  |  |  |  |  |  |  |  |
| Adrenal                        |  |  |  |  |  |  |  |  |  |  |  |  |  |  |  |  |  |  |  |  |  |  |  |
| Brown Adipose Tissue           |  |  |  |  |  |  |  |  |  |  |  |  |  |  |  |  |  |  |  |  |  |  |  |
| Fat Pad                        |  |  |  |  |  |  |  |  |  |  |  |  |  |  |  |  |  |  |  |  |  |  |  |
| Genital Fat Pad                |  |  |  |  |  |  |  |  |  |  |  |  |  |  |  |  |  |  |  |  |  |  |  |
| Subcutaneous Fat Pad           |  |  |  |  |  |  |  |  |  |  |  |  |  |  |  |  |  |  |  |  |  |  |  |
| Reproductive system            |  |  |  |  |  |  |  |  |  |  |  |  |  |  |  |  |  |  |  |  |  |  |  |
| 3134                           |  |  |  |  |  |  |  |  |  |  |  |  |  |  |  |  |  |  |  |  |  |  |  |
| Mammary Gland                  |  |  |  |  |  |  |  |  |  |  |  |  |  |  |  |  |  |  |  |  |  |  |  |
| Ovary                          |  |  |  |  |  |  |  |  |  |  |  |  |  |  |  |  |  |  |  |  |  |  |  |
| Testis                         |  |  |  |  |  |  |  |  |  |  |  |  |  |  |  |  |  |  |  |  |  |  |  |
| Lymphatic system               |  |  |  |  |  |  |  |  |  |  |  |  |  |  |  |  |  |  |  |  |  |  |  |
| 416B                           |  |  |  |  |  |  |  |  |  |  |  |  |  |  |  |  |  |  |  |  |  |  |  |
| A20                            |  |  |  |  |  |  |  |  |  |  |  |  |  |  |  |  |  |  |  |  |  |  |  |
| B-cell (CD19+)                 |  |  |  |  |  |  |  |  |  |  |  |  |  |  |  |  |  |  |  |  |  |  |  |
| B-cell (CD43-)                 |  |  |  |  |  |  |  |  |  |  |  |  |  |  |  |  |  |  |  |  |  |  |  |
| Bone Marrow                    |  |  |  |  |  |  |  |  |  |  |  |  |  |  |  |  |  |  |  |  |  |  |  |
| Bone Marrow Derived Macrophage |  |  |  |  |  |  |  |  |  |  |  |  |  |  |  |  |  |  |  |  |  |  |  |
| CH12                           |  |  |  |  |  |  |  |  |  |  |  |  |  |  |  |  |  |  |  |  |  |  |  |
| L1210                          |  |  |  |  |  |  |  |  |  |  |  |  |  |  |  |  |  |  |  |  |  |  |  |
| MEL                            |  |  |  |  |  |  |  |  |  |  |  |  |  |  |  |  |  |  |  |  |  |  |  |
| MEP                            |  |  |  |  |  |  |  |  |  |  |  |  |  |  |  |  |  |  |  |  |  |  |  |
| Megakaryocyte                  |  |  |  |  |  |  |  |  |  |  |  |  |  |  |  |  |  |  |  |  |  |  |  |
| NH3T3                          |  |  |  |  |  |  |  |  |  |  |  |  |  |  |  |  |  |  |  |  |  |  |  |
| Spleen                         |  |  |  |  |  |  |  |  |  |  |  |  |  |  |  |  |  |  |  |  |  |  |  |
| T-Naive                        |  |  |  |  |  |  |  |  |  |  |  |  |  |  |  |  |  |  |  |  |  |  |  |
| T-Helper-Activated             |  |  |  |  |  |  |  |  |  |  |  |  |  |  |  |  |  |  |  |  |  |  |  |
| TReg                           |  |  |  |  |  |  |  |  |  |  |  |  |  |  |  |  |  |  |  |  |  |  |  |
| TReg-Activated                 |  |  |  |  |  |  |  |  |  |  |  |  |  |  |  |  |  |  |  |  |  |  |  |
| Thymus                         |  |  |  |  |  |  |  |  |  |  |  |  |  |  |  |  |  |  |  |  |  |  |  |
| mG/ER                          |  |  |  |  |  |  |  |  |  |  |  |  |  |  |  |  |  |  |  |  |  |  |  |
| Stem cells                     |  |  |  |  |  |  |  |  |  |  |  |  |  |  |  |  |  |  |  |  |  |  |  |
| 10T1/2                         |  |  |  |  |  |  |  |  |  |  |  |  |  |  |  |  |  |  |  |  |  |  |  |
| ES-46C                         |  |  |  |  |  |  |  |  |  |  |  |  |  |  |  |  |  |  |  |  |  |  |  |
| ES-Bruce4                      |  |  |  |  |  |  |  |  |  |  |  |  |  |  |  |  |  |  |  |  |  |  |  |
| ES-CJ7                         |  |  |  |  |  |  |  |  |  |  |  |  |  |  |  |  |  |  |  |  |  |  |  |
| ES-D3                          |  |  |  |  |  |  |  |  |  |  |  |  |  |  |  |  |  |  |  |  |  |  |  |
| ES-E14                         |  |  |  |  |  |  |  |  |  |  |  |  |  |  |  |  |  |  |  |  |  |  |  |
| ES-EM5Sox17huCD25              |  |  |  |  |  |  |  |  |  |  |  |  |  |  |  |  |  |  |  |  |  |  |  |
| ES-TT2                         |  |  |  |  |  |  |  |  |  |  |  |  |  |  |  |  |  |  |  |  |  |  |  |
| ES-WW6                         |  |  |  |  |  |  |  |  |  |  |  |  |  |  |  |  |  |  |  |  |  |  |  |
| ES-WW6_F1KO                    |  |  |  |  |  |  |  |  |  |  |  |  |  |  |  |  |  |  |  |  |  |  |  |
| EpiSC-5                        |  |  |  |  |  |  |  |  |  |  |  |  |  |  |  |  |  |  |  |  |  |  |  |
| EpiSC-7                        |  |  |  |  |  |  |  |  |  |  |  |  |  |  |  |  |  |  |  |  |  |  |  |
| Headless Embryo                |  |  |  |  |  |  |  |  |  |  |  |  |  |  |  |  |  |  |  |  |  |  |  |
| MEF                            |  |  |  |  |  |  |  |  |  |  |  |  |  |  |  |  |  |  |  |  |  |  |  |
| Mesoderm                       |  |  |  |  |  |  |  |  |  |  |  |  |  |  |  |  |  |  |  |  |  |  |  |
| ZhBTc4                         |  |  |  |  |  |  |  |  |  |  |  |  |  |  |  |  |  |  |  |  |  |  |  |

|                    | BHLHE40 | CEBPB | CHD1 | CHD2 | CTCF | E2F4 | EP300 | ETS1 | FLI1 | FOSL1 | GABPA | GATA1 | GATA2 | HCFC1 | JUN | JUND | KAT5A | MAFK | MAX | MAZ | MXI1 | MYB |  |
|--------------------|---------|-------|------|------|------|------|-------|------|------|-------|-------|-------|-------|-------|-----|------|-------|------|-----|-----|------|-----|--|
| Skeletal system    |         |       |      |      |      |      |       |      |      |       |       |       |       |       |     |      |       |      |     |     |      |     |  |
| Limb               |         |       |      |      |      |      |       |      |      |       |       |       |       |       |     |      |       |      |     |     |      |     |  |
| Muscular system    |         |       |      |      |      |      |       |      |      |       |       |       |       |       |     |      |       |      |     |     |      |     |  |
| C2C12              |         |       |      |      |      |      |       |      |      |       |       |       |       |       |     |      |       |      |     |     |      |     |  |
| Circulatory system |         |       |      |      |      |      |       |      |      |       |       |       |       |       |     |      |       |      |     |     |      |     |  |
| Erythroblast       |         |       |      |      |      |      |       |      |      |       |       |       |       |       |     |      |       |      |     |     |      |     |  |
| G1E                |         |       |      |      |      |      |       |      |      |       |       |       |       |       |     |      |       |      |     |     |      |     |  |
| G1E-ER4            |         |       |      |      |      |      |       |      |      |       |       |       |       |       |     |      |       |      |     |     |      |     |  |
| Heart              |         |       |      |      |      |      |       |      |      |       |       |       |       |       |     |      |       |      |     |     |      |     |  |
| Nervous system     |         |       |      |      |      |      |       |      |      |       |       |       |       |       |     |      |       |      |     |     |      |     |  |





Supplementary Table 3: List of genomics experiments conducted in this study.

|               | Tissue/cell type            | Replicate | Note1                 | Note2           | DCC number       | GEO number       |           |
|---------------|-----------------------------|-----------|-----------------------|-----------------|------------------|------------------|-----------|
| RNA-Seq, CSHL | Adrenal                     | 1         | 1AWC                  | LID20728        | wgEncodeEM002520 | GSM900188        |           |
|               | Adrenal                     | 2         | 1BWC                  | LID20729        | wgEncodeEM002520 | GSM900188        |           |
|               | Bladder                     | 1         | 30AWC                 | LID47030        | wgEncodeEM003062 | GSM1000564       |           |
|               | Bladder                     | 2         | 30BWC                 | LID47031        | wgEncodeEM003062 | GSM1000564       |           |
|               | CNS                         | 1         | 23AWC                 | LID46948        | wgEncodeEM003056 | GSM1000569       |           |
|               | CNS                         | 1         | 24AWC                 | LID46950        | wgEncodeEM003057 | GSM1000570       |           |
|               | CNS                         | 2         | 23BWC                 | LID46949        | wgEncodeEM003056 | GSM1000569       |           |
|               | CNS                         | 2         | 24BWC                 | LID46951        | wgEncodeEM003057 | GSM1000570       |           |
|               | CNS                         | 1         | 21AWC                 | LID46946        | wgEncodeEM003052 | GSM1000573       |           |
|               | CNS                         | 2         | 21BWC                 | LID46947        | wgEncodeEM003052 | GSM1000573       |           |
|               | Cerebellum                  | 1         | 20AWC                 | LID47036        | wgEncodeEM003058 | GSM1000567       |           |
|               | Cerebellum                  | 2         | 20BWC                 | LID47037        | wgEncodeEM003058 | GSM1000567       |           |
|               | Colon                       | 1         | 14AWC                 | LID21040        | wgEncodeEM002512 | GSM900198        |           |
|               | Colon                       | 2         | 14BWC                 | LID21041        | wgEncodeEM002512 | GSM900198        |           |
|               | Cortex                      | 1         | 6AWC                  | LID47032        | wgEncodeEM003063 | GSM1000563       |           |
|               | Cortex                      | 2         | 6BWC                  | LID47033        | wgEncodeEM003063 | GSM1000563       |           |
|               | Duodenum                    | 1         | 2AWC                  | LID20730        | wgEncodeEM002521 | GSM900187        |           |
|               | Duodenum                    | 2         | 2BWC                  | LID20731        | wgEncodeEM002521 | GSM900187        |           |
|               | Frontal Lobe                | 1         | 7AWC                  | LID47081        | wgEncodeEM003064 | GSM1000562       |           |
|               | Frontal Lobe                | 2         | 7BWC                  | LID47082        | wgEncodeEM003064 | GSM1000562       |           |
|               | Genital Fat Pad             | 1         | 4AWC                  | LID21179        | wgEncodeEM002522 | GSM900190        |           |
|               | Genital Fat Pad             | 2         | 4BWC                  | LID21180        | wgEncodeEM002522 | GSM900190        |           |
|               | Heart                       | 1         | 16AWC                 | LID20870        | wgEncodeEM002513 | GSM900199        |           |
|               | Heart                       | 2         | 16BWC                 | LID20871        | wgEncodeEM002513 | GSM900199        |           |
|               | Kidney                      | 1         | 17AWC                 | LID20872        | wgEncodeEM002514 | GSM900194        |           |
|               | Kidney                      | 2         | 17BWC                 | LID20873        | wgEncodeEM002514 | GSM900194        |           |
|               | Large Intestine             | 1         | 8AWC                  | LID21183        | wgEncodeEM002523 | GSM900189        |           |
|               | Large Intestine             | 2         | 8BWC                  | LID21184        | wgEncodeEM002523 | GSM900189        |           |
|               | Limb                        | 1         | 29AWC                 | LID46985        | wgEncodeEM003059 | GSM1000568       |           |
|               | Limb                        | 2         | 29BWC                 | LID46986        | wgEncodeEM003059 | GSM1000568       |           |
|               | Liver                       | 1         | 26AWC                 | LID47144        | wgEncodeEM003053 | GSM1000574       |           |
|               | Liver                       | 1         | 28AWC                 | LID47146        | wgEncodeEM003054 | GSM1000571       |           |
|               | Liver                       | 2         | 26BWC                 | LID47145        | wgEncodeEM003053 | GSM1000574       |           |
|               | Liver                       | 2         | 28BWC                 | LID47147        | wgEncodeEM003054 | GSM1000571       |           |
|               | Liver                       | 1         | 27AWC                 | LID47148        | wgEncodeEM003060 | GSM1000566       |           |
|               | Liver                       | 2         | 27BWC                 | LID47149        | wgEncodeEM003060 | GSM1000566       |           |
|               | Liver                       | 1         | 18AWC                 | LID21042        | wgEncodeEM002515 | GSM900195        |           |
|               | Liver                       | 2         | 18BWC                 | LID21043        | wgEncodeEM002515 | GSM900195        |           |
|               | Lung                        | 1         | 15AWC                 | LID20920        | wgEncodeEM002516 | GSM900196        |           |
|               | Lung                        | 2         | 15BWC                 | LID20921        | wgEncodeEM002516 | GSM900196        |           |
|               | Mammary Gland               | 1         | 22AWC                 | LID20924        | wgEncodeEM002524 | GSM900184        |           |
|               | Mammary Gland               | 2         | 22BWC                 | LID20925        | wgEncodeEM002524 | GSM900184        |           |
|               | Ovary                       | 1         | 11AWC                 | LID20821        | wgEncodeEM002525 | GSM900183        |           |
|               | Ovary                       | 2         | 11BWC                 | LID20822        | wgEncodeEM002525 | GSM900183        |           |
|               | Placenta                    | 1         | 10AWC                 | LID46983        | wgEncodeEM003061 | GSM1000565       |           |
|               | Placenta                    | 2         | 10BWC                 | LID46984        | wgEncodeEM003061 | GSM1000565       |           |
|               | Small Intestine             | 1         | 9AWC                  | LID20819        | wgEncodeEM002526 | GSM900186        |           |
|               | Small Intestine             | 2         | 9BWC                  | LID20820        | wgEncodeEM002526 | GSM900186        |           |
|               | Spleen                      | 1         | 13AWC                 | LID21038        | wgEncodeEM002517 | GSM900197        |           |
|               | Spleen                      | 2         | 13BWC                 | LID21039        | wgEncodeEM002517 | GSM900197        |           |
|               | Stomach                     | 1         | 3AWC                  | LID20732        | wgEncodeEM002527 | GSM900185        |           |
|               | Stomach                     | 2         | 3BWC                  | LID20733        | wgEncodeEM002527 | GSM900185        |           |
|               | Subcutaneous Fat Pad        | 1         | 5AWC                  | LID21181        | wgEncodeEM002528 | GSM900191        |           |
|               | Subcutaneous Fat Pad        | 2         | 5BWC                  | LID21182        | wgEncodeEM002528 | GSM900191        |           |
|               | Testis                      | 1         | 12AWC                 | LID20868        | wgEncodeEM002519 | GSM900193        |           |
|               | Testis                      | 2         | 12BWC                 | LID20869        | wgEncodeEM002519 | GSM900193        |           |
|               | Thymus                      | 1         | 19AWC                 | LID20922        | wgEncodeEM002518 | GSM900192        |           |
|               | Thymus                      | 2         | 19BWC                 | LID20923        | wgEncodeEM002518 | GSM900192        |           |
|               | Whole Brain                 | 1         | 25AWC                 | LID46987        | wgEncodeEM003055 | GSM1000572       |           |
|               | Whole Brain                 | 2         | 25BWC                 | LID46988        | wgEncodeEM003055 | GSM1000572       |           |
|               | RNA-Seq, CalTech            | 10T1/2    | 1                     | EqS_2.0pct_60hr |                  | wgEncodeEM002734 | GSM929772 |
|               |                             | 10T1/2    | 1                     | None            |                  | wgEncodeEM002735 | GSM929773 |
|               |                             | C2C12     | 1                     | EqS_2.0pct_60hr |                  | wgEncodeEM002733 | GSM929775 |
|               |                             | C2C12     | 1                     | None            |                  | wgEncodeEM002732 | GSM929774 |
| RNA-Seq, LICR | Brown Adipose Tissue        | 1         | Adult 24 weeks        |                 | wgEncodeEM002635 | GSM929703        |           |
|               | Brown Adipose Tissue        | 2         | Adult 24 weeks        |                 | wgEncodeEM002635 | GSM929703        |           |
|               | Bone Marrow Derived Macroph | 1         | Adult 8 weeks         |                 | wgEncodeEM002636 | GSM929705        |           |
|               | Bone Marrow Derived Macroph | 2         | Adult 8 weeks         |                 | wgEncodeEM002636 | GSM929705        |           |
|               | Bone Marrow                 | 1         | Adult 8 weeks         |                 | wgEncodeEM001706 | GSM929717        |           |
|               | Bone Marrow                 | 2         | Adult 8 weeks         |                 | wgEncodeEM001706 | GSM929717        |           |
|               | Cerebellum                  | 1         | Adult 8 weeks         |                 | wgEncodeEM001710 | GSM929709        |           |
|               | Cerebellum                  | 2         | Adult 8 weeks         |                 | wgEncodeEM001710 | GSM929709        |           |
|               | Cortex                      | 1         | Adult 8 weeks         |                 | wgEncodeEM001711 | GSM929708        |           |
|               | Cortex                      | 2         | Adult 8 weeks         |                 | wgEncodeEM001711 | GSM929708        |           |
|               | ES-Bruce4                   | 1         | Embryonic day 0 (stem |                 | wgEncodeEM001707 | GSM929718        |           |
|               | ES-Bruce4                   | 2         | Embryonic day 0 (stem |                 | wgEncodeEM001707 | GSM929718        |           |
|               | Heart                       | 1         | Embryonic day 14.5    |                 | wgEncodeEM002391 | GSM929724        |           |
|               | Heart                       | 2         | Embryonic day 14.5    |                 | wgEncodeEM002391 | GSM929724        |           |
|               | Heart                       | 1         | Adult 8 weeks         |                 | wgEncodeEM001712 | GSM929707        |           |
|               | Heart                       | 2         | Adult 8 weeks         |                 | wgEncodeEM001712 | GSM929707        |           |
|               | Kidney                      | 1         | Adult 8 weeks         |                 | wgEncodeEM001713 | GSM929706        |           |
|               | Kidney                      | 2         | Adult 8 weeks         |                 | wgEncodeEM001713 | GSM929706        |           |
|               | Limb                        | 1         | Embryonic day 14.5    |                 | wgEncodeEM002387 | GSM929713        |           |
|               | Limb                        | 2         | Embryonic day 14.5    |                 | wgEncodeEM002387 | GSM929713        |           |
|               | Liver                       | 1         | Embryonic day 14.5    |                 | wgEncodeEM002392 | GSM929721        |           |
|               | Liver                       | 2         | Embryonic day 14.5    |                 | wgEncodeEM002392 | GSM929721        |           |
|               | Liver                       | 1         | Adult 8 weeks         |                 | wgEncodeEM001714 | GSM929711        |           |

|               |                 |      |                        |                        |                  |                  |           |
|---------------|-----------------|------|------------------------|------------------------|------------------|------------------|-----------|
|               | Liver           | 2    | Adult 8 weeks          | wgEncodeEM001714       | GSM929711        |                  |           |
|               | Lung            | 1    | Adult 8 weeks          | wgEncodeEM001715       | GSM929710        |                  |           |
|               | Lung            | 2    | Adult 8 weeks          | wgEncodeEM001715       | GSM929710        |                  |           |
|               | MEF             | 1    | Adult 8 weeks          | wgEncodeEM001708       | GSM929719        |                  |           |
|               | MEF             | 2    | Adult 8 weeks          | wgEncodeEM001708       | GSM929719        |                  |           |
|               | MEL             | 1    | Immortal cells         | wgEncodeEM002634       | GSM929704        |                  |           |
|               | MEL             | 2    | Immortal cells         | wgEncodeEM002634       | GSM929704        |                  |           |
|               | Olfactory Bulb  | 1    | Adult 8 weeks          | wgEncodeEM002385       | GSM929712        |                  |           |
|               | Olfactory Bulb  | 2    | Adult 8 weeks          | wgEncodeEM002385       | GSM929712        |                  |           |
|               | Placenta        | 1    | Adult 8 weeks          | wgEncodeEM002393       | GSM929722        |                  |           |
|               | Placenta        | 2    | Adult 8 weeks          | wgEncodeEM002393       | GSM929722        |                  |           |
|               | Small Intestine | 1    | Adult 8 weeks          | wgEncodeEM002388       | GSM929716        |                  |           |
|               | Small Intestine | 2    | Adult 8 weeks          | wgEncodeEM002388       | GSM929716        |                  |           |
|               | Spleen          | 1    | Adult 8 weeks          | wgEncodeEM001709       | GSM929720        |                  |           |
|               | Spleen          | 2    | Adult 8 weeks          | wgEncodeEM001709       | GSM929720        |                  |           |
|               | Testis          | 1    | Adult 8 weeks          | wgEncodeEM002389       | GSM929715        |                  |           |
|               | Testis          | 2    | Adult 8 weeks          | wgEncodeEM002389       | GSM929715        |                  |           |
|               | Thymus          | 1    | Adult 8 weeks          | wgEncodeEM002386       | GSM929714        |                  |           |
|               | Thymus          | 2    | Adult 8 weeks          | wgEncodeEM002386       | GSM929714        |                  |           |
|               | Whole Brain     | 1    | Embryonic day 14.5     | wgEncodeEM002390       | GSM929723        |                  |           |
|               | Whole Brain     | 2    | Embryonic day 14.5     | wgEncodeEM002390       | GSM929723        |                  |           |
| RNA-Seq, UW   | 416B            | 1    | B6D2F1/J               | Immortal cells         | wgEncodeEM002947 | GSM970855        |           |
|               | 416B            | 2    | B6D2F1/J               | Immortal cells         | wgEncodeEM002947 | GSM970855        |           |
|               | A20             | 1    | BALB/cAnN              | Immortal cells         | wgEncodeEM002948 | GSM970854        |           |
|               | A20             | 2    | BALB/cAnN              | Immortal cells         | wgEncodeEM002948 | GSM970854        |           |
|               | B-cell (CD19+)  | 1    | C57BL/6                | Adult 8 weeks          | wgEncodeEM002951 | GSM970867        |           |
|               | B-cell (CD43-)  | 1    | C57BL/6                | Adult 8 weeks          | wgEncodeEM002952 | GSM970868        |           |
|               | B-cell (CD43-)  | 2    | C57BL/6                | Adult 8 weeks          | wgEncodeEM002952 | GSM970868        |           |
|               | Cerebellum      | 1    | C57BL/6                | Adult 8 weeks          | wgEncodeEM001986 | GSM970856        |           |
|               | Cerebellum      | 2    | C57BL/6                | Adult 8 weeks          | wgEncodeEM001986 | GSM970856        |           |
|               | Cerebrum        | 1    | C57BL/6                | Adult 8 weeks          | wgEncodeEM001987 | GSM970857        |           |
|               | Cerebrum        | 2    | C57BL/6                | Adult 8 weeks          | wgEncodeEM001987 | GSM970857        |           |
|               | Fat Pad         | 1    | C57BL/6                | Adult 8 weeks          | wgEncodeEM001988 | GSM970858        |           |
|               | Genital Fat Pad | 1    | C57BL/6                | Adult 8 weeks          | wgEncodeEM002953 | GSM970869        |           |
|               | Genital Fat Pad | 2    | C57BL/6                | Adult 8 weeks          | wgEncodeEM002953 | GSM970869        |           |
|               | Headless Embryo | 1    | CD-1                   | Embryonic day 11.5     | wgEncodeEM001989 | GSM970859        |           |
|               | Heart           | 1    | C57BL/6                | Adult 8 weeks          | wgEncodeEM002954 | GSM970862        |           |
|               | Heart           | 2    | C57BL/6                | Adult 8 weeks          | wgEncodeEM002954 | GSM970862        |           |
|               | Kidney          | 1    | C57BL/6                | Adult 8 weeks          | wgEncodeEM001990 | GSM970871        |           |
|               | Large Intestine | 1    | C57BL/6                | Adult 8 weeks          | wgEncodeEM002955 | GSM970863        |           |
|               | Large Intestine | 2    | C57BL/6                | Adult 8 weeks          | wgEncodeEM002955 | GSM970863        |           |
|               | Liver           | 1    |                        | 129 Embryonic day 14.5 | wgEncodeEM002961 | GSM970851        |           |
|               | Liver           | 1    | C57BL/6                | Embryonic day 14.5     | wgEncodeEM001991 | GSM970870        |           |
|               | Liver           | 1    | C57BL/6                | Adult 8 weeks          | wgEncodeEM001992 | GSM970873        |           |
|               | Liver           | 2    | C57BL/6                | Adult 8 weeks          | wgEncodeEM001992 | GSM970873        |           |
|               | Liver           | 3    | C57BL/6                | Adult 8 weeks          | wgEncodeEM001992 | GSM970873        |           |
|               | Liver           | 4    | C57BL/6                | Adult 8 weeks          | wgEncodeEM001992 | GSM970873        |           |
|               | Lung            | 1    | C57BL/6                | Adult 8 weeks          | wgEncodeEM002956 | GSM970864        |           |
|               | MEL             | 1    | Unknown                | Adult 8 weeks          | wgEncodeEM001993 | GSM970872        |           |
|               | MEL             | 2    | Unknown                | Adult 8 weeks          | wgEncodeEM001993 | GSM970872        |           |
|               | NIH-3T3         | 1    | NIH/Swiss              | Immortal cells         | wgEncodeEM002949 | GSM970853        |           |
|               | NIH-3T3         | 2    | NIH/Swiss              | Immortal cells         | wgEncodeEM002949 | GSM970853        |           |
|               | Patski          | 1    | Spretus.BL6-Xist       | Immortal cells         | wgEncodeEM002950 | GSM970866        |           |
|               | Patski          | 2    | Spretus.BL6-Xist       | Immortal cells         | wgEncodeEM002950 | GSM970866        |           |
|               | Skeletal Muscle | 1    | C57BL/6                | Adult 8 weeks          | wgEncodeEM002957 | GSM970865        |           |
|               | Skeletal Muscle | 2    | C57BL/6                | Adult 8 weeks          | wgEncodeEM002957 | GSM970865        |           |
|               | Spleen          | 1    | C57BL/6                | Adult 8 weeks          | wgEncodeEM002958 | GSM970860        |           |
|               | T-Naive         | 1    | C57BL/6                | Adult 8 weeks          | wgEncodeEM002959 | GSM970861        |           |
|               | Thymus          | 1    | C57BL/6                | Adult 8 weeks          | wgEncodeEM002960 | GSM970852        |           |
|               | Thymus          | 2    | C57BL/6                | Adult 8 weeks          | wgEncodeEM002960 | GSM970852        |           |
|               | Whole Brain     | 1    | C57BL/6                | Embryonic day 14.5     | wgEncodeEM001995 | GSM970874        |           |
|               | Whole Brain     | 1    | C57BL/6                | Embryonic day 18.5     | wgEncodeEM001997 | GSM970875        |           |
|               | Whole Brain     | 2    | C57BL/6                | Embryonic day 14.5     | wgEncodeEM001995 | GSM970874        |           |
|               | Whole Brain     | 2    | C57BL/6                | Embryonic day 18.5     | wgEncodeEM001997 | GSM970875        |           |
|               | RNA-Seq, PSU    | CH12 | 1                      | None                   | 1x41             | wgEncodeEM003177 | GSM995540 |
|               |                 | CH12 | 2                      | None                   | 1x41             | wgEncodeEM003177 | GSM995540 |
| Erythroblast  |                 | 1    | None                   | 2x99D                  | wgEncodeEM003180 | GSM995533        |           |
| Erythroblast  |                 | 2    | None                   | 2x99D                  | wgEncodeEM003180 | GSM995533        |           |
| FVL-stem      |                 | 1    | None                   | 2x99D                  | wgEncodeEM003182 | GSM995535        |           |
| FVL-stem      |                 | 2    | None                   | 2x99D                  | wgEncodeEM003182 | GSM995535        |           |
| FV-progenitor |                 | 1    | None                   | 2x99D                  | wgEncodeEM003181 | GSM995534        |           |
| FV-progenitor |                 | 2    | None                   | 2x99D                  | wgEncodeEM003181 | GSM995534        |           |
| G1E           |                 | 1    | None                   | 1x36                   | wgEncodeEM003178 | GSM995530        |           |
| G1E           |                 | 2    | None                   | 1x55                   | wgEncodeEM003178 | GSM995530        |           |
| G1E           |                 | 1    | None                   | 2x99D                  | wgEncodeEM003183 | GSM995536        |           |
| G1E           |                 | 2    | None                   | 2x99D                  | wgEncodeEM003183 | GSM995536        |           |
| G1E-ER4       |                 | 1    | None                   | 2x99D                  | wgEncodeEM003187 | GSM995532        |           |
| G1E-ER4       |                 | 2    | None                   | 2x99D                  | wgEncodeEM003187 | GSM995532        |           |
| G1E-ER4       |                 | 1    | Estradiol 14 hour diff | p2x99D                 | wgEncodeEM003185 | GSM995527        |           |
| G1E-ER4       |                 | 2    | Estradiol 14 hour diff | p2x99D                 | wgEncodeEM003185 | GSM995527        |           |
| G1E-ER4       |                 | 1    | Estradiol 24 hour diff | p1x36                  | wgEncodeEM003179 | GSM995529        |           |
| G1E-ER4       |                 | 2    | Estradiol 24 hour diff | p1x36                  | wgEncodeEM003179 | GSM995529        |           |
| G1E-ER4       |                 | 1    | Estradiol 24 hour diff | p2x99D                 | wgEncodeEM003189 | GSM995539        |           |
| G1E-ER4       |                 | 2    | Estradiol 24 hour diff | p2x99D                 | wgEncodeEM003189 | GSM995539        |           |
| G1E-ER4       |                 | 1    | Estradiol 30 hour diff | p2x99D                 | wgEncodeEM003192 | GSM995541        |           |
| G1E-ER4       |                 | 2    | Estradiol 30 hour diff | p2x99D                 | wgEncodeEM003192 | GSM995541        |           |
| G1E-ER4       |                 | 1    | Estradiol 3 hour diff  | pr 2x99D               | wgEncodeEM003188 | GSM995538        |           |
| G1E-ER4       |                 | 2    | Estradiol 3 hour diff  | pr 2x99D               | wgEncodeEM003188 | GSM995538        |           |
| G1E-ER4       |                 | 1    | Estradiol 7 hour diff  | pr 2x99D               | wgEncodeEM003186 | GSM995531        |           |

RNA-Seq, Yale/Standford

|               |   |                                |                  |           |
|---------------|---|--------------------------------|------------------|-----------|
| G1E-ER4       | 2 | Estradiol 7 hour diff pr 2x99D | wgEncodeEM003186 | GSM995531 |
| MEL           | 1 | DMSO_2.0pct 1x45               | wgEncodeEM003191 | GSM995526 |
| MEL           | 2 | DMSO_2.0pct 1x45               | wgEncodeEM003191 | GSM995526 |
| MEL           | 1 | None 1x45                      | wgEncodeEM003190 | GSM995528 |
| MEL           | 2 | None 1x45                      | wgEncodeEM003190 | GSM995528 |
| MEP           | 1 | None 2x99D                     | wgEncodeEM003184 | GSM995525 |
| MEP           | 2 | None 2x99D                     | wgEncodeEM003184 | GSM995525 |
| Megakaryocyte | 1 | None 2x99D                     | wgEncodeEM003193 | GSM995537 |
| Megakaryocyte | 2 | None 2x99D                     | wgEncodeEM003193 | GSM995537 |
| CH12          | 1 | None FastqRd1                  | wgEncodeEM002000 | GSM973234 |
| CH12          | 2 | None FastqRd1                  | wgEncodeEM002000 | GSM973234 |
| ES-E14        | 1 | None FastqRd1                  | wgEncodeEM002899 | GSM973235 |
| ES-E14        | 2 | None FastqRd1                  | wgEncodeEM002899 | GSM973235 |
| MEL           | 1 | DMSO_2.0pct FastqRd1           | wgEncodeEM001998 | GSM973233 |
| MEL           | 2 | DMSO_2.0pct FastqRd1           | wgEncodeEM001998 | GSM973233 |
| MEL           | 1 | None FastqRd1                  | wgEncodeEM001999 | GSM973232 |
| MEL           | 2 | None FastqRd1                  | wgEncodeEM001999 | GSM973232 |

DHS, UW

| Tisse/cell type            | Replicate | Note1             | Note2                       | Notes3 | Gender | DCC number       | GEO number |
|----------------------------|-----------|-------------------|-----------------------------|--------|--------|------------------|------------|
| 3134                       | 2         | RIII              | Immortal cells              |        | M      | wgEncodeEM001721 | GSM1014196 |
| 3134                       | 1         | RIII              | Immortal cells              |        | M      | wgEncodeEM001721 | GSM1014196 |
| 416B                       | 2         | B6D2F1/J          | Immortal cells              |        | M      | wgEncodeEM001717 | GSM1014163 |
| 416B                       | 1         | B6D2F1/J          | Immortal cells              |        | M      | wgEncodeEM001717 | GSM1014163 |
| A20                        | 2         | BALB/cAnN         | Immortal cells              |        | M      | wgEncodeEM001733 | GSM1014167 |
| A20                        | 1         | BALB/cAnN         | Immortal cells              |        | M      | wgEncodeEM001733 | GSM1014167 |
| B-cell (CD19+)             | 1         | C57BL/6           | Adult 8 weeks               |        | M      | wgEncodeEM001727 | GSM1014190 |
| B-cell (CD19+)             | 2         | C57BL/6           | Adult 8 weeks               |        | M      | wgEncodeEM001727 | GSM1014190 |
| B-cell (CD43-)             | 4         | C57BL/6           | Adult 8 weeks               |        | M      | wgEncodeEM001734 | GSM1014170 |
| B-cell (CD43-)             | 3         | C57BL/6           | Adult 8 weeks               |        | M      | wgEncodeEM001734 | GSM1014170 |
| B-cell (CD43-)             | 2         | C57BL/6           | Adult 8 weeks               |        | M      | wgEncodeEM001734 | GSM1014170 |
| B-cell (CD43-)             | 1         | C57BL/6           | Adult 8 weeks               |        | M      | wgEncodeEM001734 | GSM1014170 |
| CH12                       | 2         | B10.H-2aH-4bp/Wts | Immortal cells              |        | F      | wgEncodeEM003416 | GSM1014153 |
| CH12                       | 1         | B10.H-2aH-4bp/Wts | Immortal cells              |        | F      | wgEncodeEM003416 | GSM1014153 |
| Cerebellum                 | 1         | C57BL/6           | Adult 8 weeks               |        | M      | wgEncodeEM001716 | GSM1014164 |
| Cerebellum                 | 3         | C57BL/6           | Adult 8 weeks               |        | M      | wgEncodeEM001716 | GSM1014164 |
| Cerebellum                 | 2         | C57BL/6           | Adult 8 weeks               |        | M      | wgEncodeEM001716 | GSM1014164 |
| Cerebrum                   | 3         | C57BL/6           | Adult 8 weeks               |        | M      | wgEncodeEM001718 | GSM1014168 |
| Cerebrum                   | 2         | C57BL/6           | Adult 8 weeks               |        | M      | wgEncodeEM001718 | GSM1014168 |
| Cerebrum                   | 1         | C57BL/6           | Adult 8 weeks               |        | M      | wgEncodeEM001718 | GSM1014168 |
| EPC (CD117+ CD71+ TER119+) | 1         | CD-1              | Embryonic day 14.5          |        | M      | wgEncodeEM003411 | GSM1014157 |
| EPC (CD117+ CD71+ TER119-) | 1         | CD-1              | Embryonic day 14.5          |        | M      | wgEncodeEM003413 | GSM1014158 |
| EPC (CD117+ CD71- TER119-) | 1         | CD-1              | Embryonic day 14.5          |        | M      | wgEncodeEM003414 | GSM1014155 |
| EPC (CD117- CD71+ TER119+) | 1         | CD-1              | Embryonic day 14.5          |        | M      | wgEncodeEM003415 | GSM1014156 |
| ES-CJ7                     | 2         | 129S1/SVImJ       | Embryonic day 0 (stem cell) |        | M      | wgEncodeEM001728 | GSM1014187 |
| ES-CJ7                     | 1         | 129S1/SVImJ       | Embryonic day 0 (stem cell) |        | M      | wgEncodeEM001728 | GSM1014187 |
| ES-E14                     | 2         | 129/Ola           | Embryonic day 0 (stem cell) |        | M      | wgEncodeEM003417 | GSM1014154 |
| ES-E14                     | 1         | 129/Ola           | Embryonic day 0 (stem cell) |        | M      | wgEncodeEM003417 | GSM1014154 |
| ES-WW6                     | 2         | Unknown           | Embryonic day 0 (stem cell) |        | M      | wgEncodeEM003410 | GSM1014159 |
| ES-WW6                     | 1         | Unknown           | Embryonic day 0 (stem cell) |        | M      | wgEncodeEM003410 | GSM1014159 |
| ES-WW6_F1KO                | 2         | Unknown           | Embryonic day 0 (stem cell) |        | M      | wgEncodeEM003411 | GSM1014160 |
| ES-WW6_F1KO                | 1         | Unknown           | Embryonic day 0 (stem cell) |        | M      | wgEncodeEM003411 | GSM1014160 |
| Fat Pad                    | 2         | C57BL/6           | Adult 8 weeks               |        | M      | wgEncodeEM001731 | GSM1014165 |
| Fat Pad                    | 1         | C57BL/6           | Adult 8 weeks               |        | M      | wgEncodeEM001731 | GSM1014165 |
| Fibroblast                 | 2         | C57BL/6           | Adult 8 weeks               |        | M      | wgEncodeEM001719 | GSM1014199 |
| Fibroblast                 | 1         | C57BL/6           | Adult 8 weeks               |        | M      | wgEncodeEM001719 | GSM1014199 |
| Fore Limb Bud              | 2         | CD-1              | Embryonic day 11.5          |        | M      | wgEncodeEM001931 | GSM1014174 |
| Fore Limb Bud              | 1         | CD-1              | Embryonic day 11.5          |        | M      | wgEncodeEM001931 | GSM1014174 |
| Genital Fat Pad            | 2         | C57BL/6           | Adult 8 weeks               |        | M      | wgEncodeEM001932 | GSM1014173 |
| Genital Fat Pad            | 1         | C57BL/6           | Adult 8 weeks               |        | M      | wgEncodeEM001932 | GSM1014173 |
| Headless Embryo            | 2         | CD-1              | Embryonic day 11.5          |        | M      | wgEncodeEM001933 | GSM1014172 |
| Headless Embryo            | 1         | CD-1              | Embryonic day 11.5          |        | M      | wgEncodeEM001933 | GSM1014172 |
| Heart                      | 2         | C57BL/6           | Adult 8 weeks               |        | M      | wgEncodeEM001730 | GSM1014166 |
| Heart                      | 1         | C57BL/6           | Adult 8 weeks               |        | M      | wgEncodeEM001730 | GSM1014166 |
| Hind Limb Bud              | 2         | CD-1              | Embryonic day 11.5          |        | M      | wgEncodeEM001934 | GSM1014179 |
| Hind Limb Bud              | 1         | CD-1              | Embryonic day 11.5          |        | M      | wgEncodeEM001934 | GSM1014179 |
| Kidney                     | 2         | C57BL/6           | Adult 8 weeks               |        | M      | wgEncodeEM001722 | GSM1014193 |
| Kidney                     | 1         | C57BL/6           | Adult 8 weeks               |        | M      | wgEncodeEM001722 | GSM1014193 |
| Large Intestine            | 2         | C57BL/6           | Adult 8 weeks               |        | M      | wgEncodeEM003397 | GSM1014186 |
| Large Intestine            | 1         | C57BL/6           | Adult 8 weeks               |        | M      | wgEncodeEM003397 | GSM1014186 |
| Liver                      | 1         | 129               | Embryonic day 14.5          |        | M      | wgEncodeEM003419 | GSM1014162 |
| Liver                      | 2         | 129.ŒILCR/ŒILCR   | Embryonic day 14.5          |        | M      | wgEncodeEM003418 | GSM1014161 |
| Liver                      | 1         | 129.ŒILCR/ŒILCR   | Embryonic day 14.5          |        | M      | wgEncodeEM003418 | GSM1014161 |
| Liver                      | 1         | C57BL/6           | Embryonic day 14.5          |        | M      | wgEncodeEM003401 | GSM1014183 |
| Liver                      | 9         | C57BL/6           | Adult 8 weeks               |        | M      | wgEncodeEM001720 | GSM1014195 |
| Liver                      | 8         | C57BL/6           | Adult 8 weeks               |        | M      | wgEncodeEM001720 | GSM1014195 |
| Liver                      | 7         | C57BL/6           | Adult 8 weeks               |        | M      | wgEncodeEM001720 | GSM1014195 |
| Liver                      | 6         | C57BL/6           | Adult 8 weeks               |        | M      | wgEncodeEM001720 | GSM1014195 |
| Liver                      | 5         | C57BL/6           | Adult 8 weeks               |        | M      | wgEncodeEM001720 | GSM1014195 |
| Liver                      | 4         | C57BL/6           | Adult 8 weeks               |        | M      | wgEncodeEM001720 | GSM1014195 |
| Liver                      | 3         | C57BL/6           | Adult 8 weeks               |        | M      | wgEncodeEM001720 | GSM1014195 |
| Liver                      | 2         | C57BL/6           | Adult 8 weeks               |        | M      | wgEncodeEM001720 | GSM1014195 |
| Liver                      | 14        | C57BL/6           | Adult 8 weeks               |        | M      | wgEncodeEM001720 | GSM1014195 |
| Liver                      | 13        | C57BL/6           | Adult 8 weeks               |        | M      | wgEncodeEM001720 | GSM1014195 |
| Liver                      | 12        | C57BL/6           | Adult 8 weeks               |        | M      | wgEncodeEM001720 | GSM1014195 |
| Liver                      | 11        | C57BL/6           | Adult 8 weeks               |        | M      | wgEncodeEM001720 | GSM1014195 |
| Liver                      | 10        | C57BL/6           | Adult 8 weeks               |        | M      | wgEncodeEM001720 | GSM1014195 |
| Liver                      | 1         | C57BL/6           | Adult 8 weeks               |        | M      | wgEncodeEM001720 | GSM1014195 |
| Lung                       | 3         | C57BL/6           | Adult 8 weeks               |        | M      | wgEncodeEM001723 | GSM1014194 |
| Lung                       | 2         | C57BL/6           | Adult 8 weeks               |        | M      | wgEncodeEM001723 | GSM1014194 |

|                    |                             |                  |                             |               |                  |               |                   |                   |
|--------------------|-----------------------------|------------------|-----------------------------|---------------|------------------|---------------|-------------------|-------------------|
| Lung               | 1                           | C57BL/6          | Adult 8 weeks               | M             | wgEncodeEM001723 | GSM1014194    |                   |                   |
| MEL                | 3                           | Unknown          | Immortal cells              | M             | wgEncodeEM001724 | GSM1014191    |                   |                   |
| MEL                | 2                           | Unknown          | Immortal cells              | M             | wgEncodeEM001724 | GSM1014191    |                   |                   |
| MEL                | 1                           | Unknown          | Immortal cells              | M             | wgEncodeEM001724 | GSM1014191    |                   |                   |
| Mesoderm           | 2                           | CD-1             | Embryonic day 11.5          | M             | wgEncodeEM001935 | GSM1014178    |                   |                   |
| Mesoderm           | 1                           | CD-1             | Embryonic day 11.5          | M             | wgEncodeEM001935 | GSM1014178    |                   |                   |
| NIH-3T3            | 2                           | NIH/Swiss        | Immortal cells              | M             | wgEncodeEM001936 | GSM1014177    |                   |                   |
| NIH-3T3            | 1                           | NIH/Swiss        | Immortal cells              | M             | wgEncodeEM001936 | GSM1014177    |                   |                   |
| Patski             | 2                           | Spretus.BL6-Xist | Immortal cells              | M             | wgEncodeEM001736 | GSM1014171    |                   |                   |
| Patski             | 1                           | Spretus.BL6-Xist | Immortal cells              | M             | wgEncodeEM001736 | GSM1014171    |                   |                   |
| Retina             | 1                           | C57BL/6          | Adult 1 week                | M             | wgEncodeEM003398 | GSM1014198    |                   |                   |
| Retina             | 1                           | C57BL/6          | Adult 8 weeks               | M             | wgEncodeEM003402 | GSM1014175    |                   |                   |
| Retina             | 1                           | C57BL/6          | Newborn 1 day               | M             | wgEncodeEM003400 | GSM1014188    |                   |                   |
| Skeletal Muscle    | 2                           | C57BL/6          | Adult 8 weeks               | M             | wgEncodeEM003399 | GSM1014189    |                   |                   |
| Skeletal Muscle    | 1                           | C57BL/6          | Adult 8 weeks               | M             | wgEncodeEM003399 | GSM1014189    |                   |                   |
| Spleen             | 2                           | C57BL/6          | Adult 8 weeks               | M             | wgEncodeEM003394 | GSM1014182    |                   |                   |
| Spleen             | 1                           | C57BL/6          | Adult 8 weeks               | M             | wgEncodeEM003394 | GSM1014182    |                   |                   |
| T-Naive            | 4                           | C57BL/6          | Adult 8 weeks               | M             | wgEncodeEM001725 | GSM1014192    |                   |                   |
| T-Naive            | 3                           | C57BL/6          | Adult 8 weeks               | M             | wgEncodeEM001725 | GSM1014192    |                   |                   |
| T-Naive            | 2                           | C57BL/6          | Adult 8 weeks               | M             | wgEncodeEM001725 | GSM1014192    |                   |                   |
| T-Naive            | 1                           | C57BL/6          | Adult 8 weeks               | M             | wgEncodeEM001725 | GSM1014192    |                   |                   |
| THelper-Activated  | 2                           | C57BL/6          | Adult 8 weeks               | M             | wgEncodeEM003403 | GSM1014149    |                   |                   |
| THelper-Activated  | 1                           | C57BL/6          | Adult 8 weeks               | M             | wgEncodeEM003403 | GSM1014149    |                   |                   |
| TReg               | 3                           | C57BL/6          | Adult 8 weeks               | M             | wgEncodeEM001732 | GSM1014148    |                   |                   |
| TReg               | 2                           | C57BL/6          | Adult 8 weeks               | M             | wgEncodeEM001732 | GSM1014148    |                   |                   |
| TReg               | 1                           | C57BL/6          | Adult 8 weeks               | M             | wgEncodeEM001732 | GSM1014148    |                   |                   |
| TReg-Activated     | 2                           | C57BL/6          | Adult 8 weeks               | M             | wgEncodeEM003404 | GSM1014200    |                   |                   |
| TReg-Activated     | 1                           | C57BL/6          | Adult 8 weeks               | M             | wgEncodeEM003404 | GSM1014200    |                   |                   |
| Thymus             | 2                           | C57BL/6          | Adult 8 weeks               | M             | wgEncodeEM003395 | GSM1014185    |                   |                   |
| Thymus             | 1                           | C57BL/6          | Adult 8 weeks               | M             | wgEncodeEM003395 | GSM1014185    |                   |                   |
| Whole Brain        | 2                           | C57BL/6          | Embryonic day 14.5          | M             | wgEncodeEM001726 | GSM1014197    |                   |                   |
| Whole Brain        | 1                           | C57BL/6          | Embryonic day 14.5          | M             | wgEncodeEM001726 | GSM1014197    |                   |                   |
| Whole Brain        | 2                           | C57BL/6          | Embryonic day 18.5          | M             | wgEncodeEM003396 | GSM1014184    |                   |                   |
| Whole Brain        | 1                           | C57BL/6          | Embryonic day 18.5          | M             | wgEncodeEM003396 | GSM1014184    |                   |                   |
| Whole Brain        | 7                           | C57BL/6          | Adult 8 weeks               | M             | wgEncodeEM001729 | GSM1014151    |                   |                   |
| Whole Brain        | 6                           | C57BL/6          | Adult 8 weeks               | M             | wgEncodeEM001729 | GSM1014151    |                   |                   |
| Whole Brain        | 5                           | C57BL/6          | Adult 8 weeks               | M             | wgEncodeEM001729 | GSM1014151    |                   |                   |
| Whole Brain        | 4                           | C57BL/6          | Adult 8 weeks               | M             | wgEncodeEM001729 | GSM1014151    |                   |                   |
| Whole Brain        | 3                           | C57BL/6          | Adult 8 weeks               | M             | wgEncodeEM001729 | GSM1014151    |                   |                   |
| Whole Brain        | 2                           | C57BL/6          | Adult 8 weeks               | M             | wgEncodeEM001729 | GSM1014151    |                   |                   |
| Whole Brain        | 1                           | C57BL/6          | Adult 8 weeks               | M             | wgEncodeEM001729 | GSM1014151    |                   |                   |
| ZhBtc4             | 2                           | 129/Ola          | Embryonic day 0 (stem cell) | M             | wgEncodeEM001735 | GSM1014169    |                   |                   |
| ZhBtc4             | 1                           | 129/Ola          | Embryonic day 0 (stem cell) | M             | wgEncodeEM001735 | GSM1014169    |                   |                   |
| ZhBtc4             | 1                           | 129/Ola          | Embryonic day 0 (stem cell) | M             | wgEncodeEM003406 | GSM1014152    |                   |                   |
| ZhBtc4             | 2                           | 129/Ola          | Embryonic day 0 (stem cell) | M             | wgEncodeEM003406 | GSM1014152    |                   |                   |
| ZhBtc4             | 1                           | 129/Ola          | Embryonic day 0 (stem cell) | M             | wgEncodeEM003407 | GSM1014150    |                   |                   |
| ZhBtc4             | 2                           | 129/Ola          | Embryonic day 0 (stem cell) | M             | wgEncodeEM003407 | GSM1014150    |                   |                   |
| mG/ER              | 2                           | C57BL/6          | Adult 8 weeks               | M             | wgEncodeEM003405 | GSM1014176    |                   |                   |
| mG/ER              | 1                           | C57BL/6          | Adult 8 weeks               | M             | wgEncodeEM003405 | GSM1014176    |                   |                   |
| mG/ER              | 1                           | C57BL/6          | Adult 8 weeks               | M             | wgEncodeEM003408 | GSM1014181    |                   |                   |
| mG/ER              | 2                           | C57BL/6          | Adult 8 weeks               | M             | wgEncodeEM003408 | GSM1014181    |                   |                   |
| mG/ER              | 1                           | C57BL/6          | Adult 8 weeks               | M             | wgEncodeEM003409 | GSM1014180    |                   |                   |
| mG/ER              | 2                           | C57BL/6          | Adult 8 weeks               | M             | wgEncodeEM003409 | GSM1014180    |                   |                   |
| <b>TF, CalTech</b> | <b>Tissue/cell type</b>     | <b>Replicate</b> | <b>TF</b>                   | <b>Notes1</b> | <b>Notes2</b>    | <b>Notes3</b> | <b>DCC number</b> | <b>GEO number</b> |
|                    | C2C12                       | 1                | CEBPB (sc-150)              | Control 50bp  | EqS_2.0pct_60hr  | PCR 1-round   | wgEncodeEM002122  | GSM915180         |
|                    | C2C12                       | 2                | CEBPB (sc-150)              | Control 50bp  | EqS_2.0pct_60hr  | PCR 1-round   | wgEncodeEM002122  | GSM915180         |
|                    | C2C12                       | 1                | CEBPB (sc-150)              | Control 50bp  | None             | PCR 1-round   | wgEncodeEM002123  | GSM915179         |
|                    | C2C12                       | 1                | CTCF (07-729)               | 32bp          | None             | PCR 2-round   | wgEncodeEM002108  | GSM915188         |
|                    | C2C12                       | 1                | E2F4 (sc-866)               | Control 50bp  | EqS_2.0pct_60hr  | PCR 1-round   | wgEncodeEM002109  | GSM915187         |
|                    | C2C12                       | 1                | FOSL1 (sc-605)              | Control 36bp  | None             | PCR 1-round   | wgEncodeEM002124  | GSM915182         |
|                    | C2C12                       | 1                | Input                       | 32bp          | EqS_2.0pct_24hr  | PCR 2-round   | wgEncodeEM002110  | GSM915169         |
|                    | C2C12                       | 1                | Input                       | 32bp          | EqS_2.0pct_60hr  | PCR 2-round   | wgEncodeEM002112  | GSM915171         |
|                    | C2C12                       | 1                | Input                       | 32bp          | None             | PCR 2-round   | wgEncodeEM002111  | GSM915170         |
|                    | C2C12                       | 1                | Input                       | Control 36bp  | EqS_2.0pct_60hr  | PCR 1-round   | wgEncodeEM002125  | GSM915181         |
|                    | C2C12                       | 1                | Input                       | Control 36bp  | None             | PCR 1-round   | wgEncodeEM002137  | GSM915160         |
|                    | C2C12                       | 1                | Input                       | Control 50bp  | EqS_2.0pct_60hr  | PCR 1-round   | wgEncodeEM002126  | GSM915184         |
|                    | C2C12                       | 2                | Input                       | Control 50bp  | EqS_2.0pct_60hr  | PCR 1-round   | wgEncodeEM002126  | GSM915184         |
|                    | C2C12                       | 1                | Input                       | Control 50bp  | None             | PCR 1-round   | wgEncodeEM002113  | GSM915172         |
|                    | C2C12                       | 2                | Input                       | Control 50bp  | None             | PCR 1-round   | wgEncodeEM002113  | GSM915172         |
|                    | C2C12                       | 3                | Input                       | Control 50bp  | None             | PCR 1-round   | wgEncodeEM002113  | GSM915172         |
|                    | C2C12                       | 1                | MAX (sc-197)                | Control 50bp  | EqS_2.0pct_60hr  | PCR 1-round   | wgEncodeEM002114  | GSM915173         |
|                    | C2C12                       | 1                | MAX (sc-197)                | Control 50bp  | None             | PCR 1-round   | wgEncodeEM002115  | GSM915174         |
|                    | C2C12                       | 1                | MYOD (sc-32758)             | 32bp          | EqS_2.0pct_24hr  | PCR 2-round   | wgEncodeEM002127  | GSM915183         |
|                    | C2C12                       | 1                | MYOD (sc-32758)             | 32bp          | EqS_2.0pct_60hr  | PCR 2-round   | wgEncodeEM002129  | GSM915185         |
|                    | C2C12                       | 1                | MYOD (sc-32758)             | 32bp          | None             | PCR 2-round   | wgEncodeEM002128  | GSM915186         |
|                    | C2C12                       | 1                | MYOD (sc-32758)             | Control 50bp  | EqS_2.0pct_7d    | PCR 1-round   | wgEncodeEM002130  | GSM915165         |
|                    | C2C12                       | 1                | Myogenin (sc-12732)         | 32bp          | EqS_2.0pct_24hr  | PCR 2-round   | wgEncodeEM002136  | GSM915159         |
|                    | C2C12                       | 1                | Myogenin (sc-12732)         | 32bp          | EqS_2.0pct_60hr  | PCR 2-round   | wgEncodeEM002132  | GSM915163         |
|                    | C2C12                       | 1                | Myogenin (sc-12732)         | 32bp          | None             | PCR 2-round   | wgEncodeEM002131  | GSM915166         |
|                    | C2C12                       | 1                | Myogenin (sc-12732)         | Control 50bp  | EqS_2.0pct_7d    | PCR 1-round   | wgEncodeEM002133  | GSM915164         |
|                    | C2C12                       | 1                | NRSF                        | 32bp          | EqS_2.0pct_60hr  | PCR 2-round   | wgEncodeEM002116  | GSM915175         |
|                    | C2C12                       | 1                | POL2 (MMS-126R)             | 32bp          | EqS_2.0pct_60hr  | PCR 2-round   | wgEncodeEM002117  | GSM915176         |
|                    | C2C12                       | 1                | L2 (phospho S2) (ab50)      | 32bp          | EqS_2.0pct_60hr  | PCR 2-round   | wgEncodeEM002118  | GSM915167         |
|                    | C2C12                       | 1                | SRF (sc-335)                | 32bp          | EqS_2.0pct_24hr  | PCR 2-round   | wgEncodeEM002119  | GSM915168         |
|                    | C2C12                       | 1                | TCF12 (sc-357)              | Control 50bp  | EqS_2.0pct_60hr  | PCR 1-round   | wgEncodeEM002120  | GSM915178         |
|                    | C2C12                       | 1                | TCF3 (sc-349)               | 32bp          | EqS_2.0pct_5d    | PCR 2-round   | wgEncodeEM002121  | GSM915177         |
|                    | C2C12                       | 1                | USF1 (sc-229)               | Control 50bp  | EqS_2.0pct_60hr  | PCR 1-round   | wgEncodeEM002134  | GSM915161         |
|                    | C2C12                       | 1                | USF1 (sc-229)               | Control 50bp  | None             | PCR 1-round   | wgEncodeEM002135  | GSM915162         |
| <b>TF, LICR</b>    | Bone Marrow Derived Macroph | 1                | CTCF (07-729)               | F             | Adult 8 weeks    |               | wgEncodeEM002663  | GSM918726         |

|                             |   |                     |   |                         |                  |           |
|-----------------------------|---|---------------------|---|-------------------------|------------------|-----------|
| Bone Marrow Derived Macroph | 2 | CTCF (07-729)       | F | Adult 8 weeks           | wgEncodeEM002663 | GSM918726 |
| Bone Marrow Derived Macroph | 1 | Input               | F | Adult 8 weeks           | wgEncodeEM002660 | GSM918737 |
| Bone Marrow Derived Macroph | 2 | Input               | F | Adult 8 weeks           | wgEncodeEM002660 | GSM918737 |
| Bone Marrow Derived Macroph | 1 | POL2 (MMS-126R)     | F | Adult 8 weeks           | wgEncodeEM002664 | GSM918720 |
| Bone Marrow Derived Macroph | 2 | POL2 (MMS-126R)     | F | Adult 8 weeks           | wgEncodeEM002664 | GSM918720 |
| Bone Marrow                 | 1 | CTCF (07-729)       | M | Adult 8 weeks           | wgEncodeEM001687 | GSM918757 |
| Bone Marrow                 | 2 | CTCF (07-729)       | M | Adult 8 weeks           | wgEncodeEM001687 | GSM918757 |
| Bone Marrow                 | 1 | Input               | M | Adult 8 weeks           | wgEncodeEM001447 | GSM918721 |
| Bone Marrow                 | 2 | Input               | M | Adult 8 weeks           | wgEncodeEM001447 | GSM918721 |
| Bone Marrow                 | 1 | POL2 (MMS-126R)     | M | Adult 8 weeks           | wgEncodeEM001688 | GSM918760 |
| Bone Marrow                 | 2 | POL2 (MMS-126R)     | M | Adult 8 weeks           | wgEncodeEM001688 | GSM918760 |
| Cerebellum                  | 1 | CTCF (07-729)       | M | Adult 8 weeks           | wgEncodeEM001689 | GSM918759 |
| Cerebellum                  | 2 | CTCF (07-729)       | M | Adult 8 weeks           | wgEncodeEM001689 | GSM918759 |
| Cerebellum                  | 1 | Input               | M | Adult 8 weeks           | wgEncodeEM001448 | GSM918733 |
| Cerebellum                  | 2 | Input               | M | Adult 8 weeks           | wgEncodeEM001448 | GSM918733 |
| Cerebellum                  | 1 | POL2 (MMS-126R)     | M | Adult 8 weeks           | wgEncodeEM001692 | GSM918725 |
| Cerebellum                  | 2 | POL2 (MMS-126R)     | M | Adult 8 weeks           | wgEncodeEM001692 | GSM918725 |
| Cortex                      | 1 | CTCF (07-729)       | M | Adult 8 weeks           | wgEncodeEM001690 | GSM918727 |
| Cortex                      | 2 | CTCF (07-729)       | M | Adult 8 weeks           | wgEncodeEM001690 | GSM918727 |
| Cortex                      | 1 | Input               | M | Adult 8 weeks           | wgEncodeEM001449 | GSM918732 |
| Cortex                      | 2 | Input               | M | Adult 8 weeks           | wgEncodeEM001449 | GSM918732 |
| Cortex                      | 1 | POL2 (MMS-126R)     | M | Adult 8 weeks           | wgEncodeEM001691 | GSM918728 |
| Cortex                      | 2 | POL2 (MMS-126R)     | M | Adult 8 weeks           | wgEncodeEM001691 | GSM918728 |
| ES-Bruce4                   | 1 | CTCF (07-729)       | M | Embryonic day 0 (stem c | wgEncodeEM001703 | GSM918748 |
| ES-Bruce4                   | 2 | CTCF (07-729)       | M | Embryonic day 0 (stem c | wgEncodeEM001703 | GSM918748 |
| ES-Bruce4                   | 1 | Input               | M | Embryonic day 0 (stem c | wgEncodeEM001683 | GSM918754 |
| ES-Bruce4                   | 2 | Input               | M | Embryonic day 0 (stem c | wgEncodeEM001683 | GSM918754 |
| ES-Bruce4                   | 1 | POL2 (MMS-126R)     | M | Embryonic day 0 (stem c | wgEncodeEM001704 | GSM918749 |
| ES-Bruce4                   | 2 | POL2 (MMS-126R)     | M | Embryonic day 0 (stem c | wgEncodeEM001704 | GSM918749 |
| ES-Bruce4                   | 1 | P300/EP300 (sc-585) | M | Embryonic day 0 (stem c | wgEncodeEM001705 | GSM918750 |
| ES-Bruce4                   | 2 | P300/EP300 (sc-585) | M | Embryonic day 0 (stem c | wgEncodeEM001705 | GSM918750 |
| Heart                       | 1 | CTCF (07-729)       | M | Adult 8 weeks           | wgEncodeEM001684 | GSM918756 |
| Heart                       | 2 | CTCF (07-729)       | M | Adult 8 weeks           | wgEncodeEM001684 | GSM918756 |
| Heart                       | 1 | Input               | M | Adult 8 weeks           | wgEncodeEM001450 | GSM918755 |
| Heart                       | 2 | Input               | M | Adult 8 weeks           | wgEncodeEM001450 | GSM918755 |
| Heart                       | 1 | Input               | U | Embryonic day 14.5      | wgEncodeEM002506 | GSM918729 |
| Heart                       | 2 | Input               | U | Embryonic day 14.5      | wgEncodeEM002506 | GSM918729 |
| Heart                       | 1 | POL2 (MMS-126R)     | M | Adult 8 weeks           | wgEncodeEM001694 | GSM918723 |
| Heart                       | 2 | POL2 (MMS-126R)     | M | Adult 8 weeks           | wgEncodeEM001694 | GSM918723 |
| Heart                       | 1 | P300/EP300 (sc-585) | M | Adult 8 weeks           | wgEncodeEM001702 | GSM918747 |
| Heart                       | 2 | P300/EP300 (sc-585) | M | Adult 8 weeks           | wgEncodeEM001702 | GSM918747 |
| Kidney                      | 1 | CTCF (07-729)       | M | Adult 8 weeks           | wgEncodeEM001685 | GSM918731 |
| Kidney                      | 2 | CTCF (07-729)       | M | Adult 8 weeks           | wgEncodeEM001685 | GSM918731 |
| Kidney                      | 1 | Input               | M | Adult 8 weeks           | wgEncodeEM001451 | GSM918716 |
| Kidney                      | 2 | Input               | M | Adult 8 weeks           | wgEncodeEM001451 | GSM918716 |
| Kidney                      | 1 | POL2 (MMS-126R)     | M | Adult 8 weeks           | wgEncodeEM001686 | GSM918758 |
| Kidney                      | 2 | POL2 (MMS-126R)     | M | Adult 8 weeks           | wgEncodeEM001686 | GSM918758 |
| Limb                        | 1 | CTCF (07-729)       | U | Embryonic day 14.5      | wgEncodeEM002589 | GSM918741 |
| Limb                        | 2 | CTCF (07-729)       | U | Embryonic day 14.5      | wgEncodeEM002589 | GSM918741 |
| Limb                        | 2 | Input               | U | Embryonic day 14.5      | wgEncodeEM002482 | GSM918719 |
| Limb                        | 2 | Input               | U | Embryonic day 14.5      | wgEncodeEM002482 | GSM918719 |
| Limb                        | 1 | POL2 (MMS-126R)     | U | Embryonic day 14.5      | wgEncodeEM002590 | GSM918708 |
| Limb                        | 2 | POL2 (MMS-126R)     | U | Embryonic day 14.5      | wgEncodeEM002590 | GSM918708 |
| Liver                       | 1 | CTCF (07-729)       | M | Adult 8 weeks           | wgEncodeEM001696 | GSM918715 |
| Liver                       | 2 | CTCF (07-729)       | M | Adult 8 weeks           | wgEncodeEM001696 | GSM918715 |
| Liver                       | 1 | Input               | M | Adult 8 weeks           | wgEncodeEM001452 | GSM918718 |
| Liver                       | 2 | Input               | M | Adult 8 weeks           | wgEncodeEM001452 | GSM918718 |
| Liver                       | 1 | Input               | U | Embryonic day 14.5      | wgEncodeEM002570 | GSM918753 |
| Liver                       | 2 | Input               | U | Embryonic day 14.5      | wgEncodeEM002570 | GSM918753 |
| Liver                       | 1 | POL2 (MMS-126R)     | M | Adult 8 weeks           | wgEncodeEM001693 | GSM918738 |
| Liver                       | 2 | POL2 (MMS-126R)     | M | Adult 8 weeks           | wgEncodeEM001693 | GSM918738 |
| Lung                        | 1 | CTCF (07-729)       | M | Adult 8 weeks           | wgEncodeEM001697 | GSM918722 |
| Lung                        | 2 | CTCF (07-729)       | M | Adult 8 weeks           | wgEncodeEM001697 | GSM918722 |
| Lung                        | 1 | Input               | M | Adult 8 weeks           | wgEncodeEM001453 | GSM918739 |
| Lung                        | 2 | Input               | M | Adult 8 weeks           | wgEncodeEM001453 | GSM918739 |
| Lung                        | 1 | POL2 (MMS-126R)     | M | Adult 8 weeks           | wgEncodeEM001695 | GSM918724 |
| Lung                        | 2 | POL2 (MMS-126R)     | M | Adult 8 weeks           | wgEncodeEM001695 | GSM918724 |
| MEF                         | 1 | CTCF (07-729)       | M | Adult 8 weeks           | wgEncodeEM001698 | GSM918743 |
| MEF                         | 2 | CTCF (07-729)       | M | Adult 8 weeks           | wgEncodeEM001698 | GSM918743 |
| MEF                         | 1 | Input               | M | Adult 8 weeks           | wgEncodeEM001456 | GSM918740 |
| MEF                         | 2 | Input               | M | Adult 8 weeks           | wgEncodeEM001456 | GSM918740 |
| MEF                         | 1 | POL2 (MMS-126R)     | M | Adult 8 weeks           | wgEncodeEM001699 | GSM918761 |
| MEF                         | 2 | POL2 (MMS-126R)     | M | Adult 8 weeks           | wgEncodeEM001699 | GSM918761 |
| MEL                         | 1 | CTCF (07-729)       | M | Immortal cells          | wgEncodeEM002661 | GSM918744 |
| MEL                         | 2 | CTCF (07-729)       | M | Immortal cells          | wgEncodeEM002661 | GSM918744 |
| MEL                         | 1 | Input               | M | Immortal cells          | wgEncodeEM002652 | GSM918712 |
| MEL                         | 2 | Input               | M | Immortal cells          | wgEncodeEM002652 | GSM918712 |
| MEL                         | 1 | POL2 (MMS-126R)     | M | Immortal cells          | wgEncodeEM002662 | GSM918707 |
| MEL                         | 2 | POL2 (MMS-126R)     | M | Immortal cells          | wgEncodeEM002662 | GSM918707 |
| Olfactory Bulb              | 1 | CTCF (07-729)       | M | Adult 8 weeks           | wgEncodeEM002585 | GSM918736 |
| Olfactory Bulb              | 2 | CTCF (07-729)       | M | Adult 8 weeks           | wgEncodeEM002585 | GSM918736 |
| Olfactory Bulb              | 1 | Input               | M | Adult 8 weeks           | wgEncodeEM002473 | GSM918714 |
| Olfactory Bulb              | 2 | Input               | M | Adult 8 weeks           | wgEncodeEM002473 | GSM918714 |
| Olfactory Bulb              | 1 | POL2 (MMS-126R)     | M | Adult 8 weeks           | wgEncodeEM002586 | GSM918735 |
| Olfactory Bulb              | 2 | POL2 (MMS-126R)     | M | Adult 8 weeks           | wgEncodeEM002586 | GSM918735 |
| Small Intestine             | 1 | CTCF (07-729)       | M | Adult 8 weeks           | wgEncodeEM002591 | GSM918709 |
| Small Intestine             | 2 | CTCF (07-729)       | M | Adult 8 weeks           | wgEncodeEM002591 | GSM918709 |
| Small Intestine             | 1 | Input               | M | Adult 8 weeks           | wgEncodeEM002486 | GSM918717 |
| Small Intestine             | 2 | Input               | M | Adult 8 weeks           | wgEncodeEM002486 | GSM918717 |



TF, PSU

|                 |   |                          |                   |                    |                  |           |
|-----------------|---|--------------------------|-------------------|--------------------|------------------|-----------|
| Small Intestine | 1 | POL2 (MMS-126R)          | M                 | Adult 8 weeks      | wgEncodeEM002592 | GSM918710 |
| Small Intestine | 2 | POL2 (MMS-126R)          | M                 | Adult 8 weeks      | wgEncodeEM002592 | GSM918710 |
| Spleen          | 1 | CTCF (07-729)            | M                 | Adult 8 weeks      | wgEncodeEM001700 | GSM918745 |
| Spleen          | 2 | CTCF (07-729)            | M                 | Adult 8 weeks      | wgEncodeEM001700 | GSM918745 |
| Spleen          | 1 | Input                    | M                 | Adult 8 weeks      | wgEncodeEM001459 | GSM918763 |
| Spleen          | 2 | Input                    | M                 | Adult 8 weeks      | wgEncodeEM001459 | GSM918763 |
| Spleen          | 1 | POL2 (MMS-126R)          | M                 | Adult 8 weeks      | wgEncodeEM001701 | GSM918746 |
| Spleen          | 2 | POL2 (MMS-126R)          | M                 | Adult 8 weeks      | wgEncodeEM001701 | GSM918746 |
| Testis          | 1 | CTCF (07-729)            | M                 | Adult 8 weeks      | wgEncodeEM002593 | GSM918711 |
| Testis          | 2 | CTCF (07-729)            | M                 | Adult 8 weeks      | wgEncodeEM002593 | GSM918711 |
| Testis          | 1 | Input                    | M                 | Adult 8 weeks      | wgEncodeEM002490 | GSM918751 |
| Testis          | 2 | Input                    | M                 | Adult 8 weeks      | wgEncodeEM002490 | GSM918751 |
| Testis          | 1 | POL2 (MMS-126R)          | M                 | Adult 8 weeks      | wgEncodeEM002594 | GSM918704 |
| Testis          | 2 | POL2 (MMS-126R)          | M                 | Adult 8 weeks      | wgEncodeEM002594 | GSM918704 |
| Thymus          | 1 | CTCF (07-729)            | M                 | Adult 8 weeks      | wgEncodeEM002587 | GSM918734 |
| Thymus          | 2 | CTCF (07-729)            | M                 | Adult 8 weeks      | wgEncodeEM002587 | GSM918734 |
| Thymus          | 1 | Input                    | M                 | Adult 8 weeks      | wgEncodeEM002477 | GSM918705 |
| Thymus          | 2 | Input                    | M                 | Adult 8 weeks      | wgEncodeEM002477 | GSM918705 |
| Thymus          | 1 | POL2 (MMS-126R)          | M                 | Adult 8 weeks      | wgEncodeEM002588 | GSM918742 |
| Thymus          | 2 | POL2 (MMS-126R)          | M                 | Adult 8 weeks      | wgEncodeEM002588 | GSM918742 |
| Whole Brain     | 1 | CTCF (07-729)            | U                 | Embryonic day 14.5 | wgEncodeEM002595 | GSM918730 |
| Whole Brain     | 2 | CTCF (07-729)            | U                 | Embryonic day 14.5 | wgEncodeEM002595 | GSM918730 |
| Whole Brain     | 2 | Input                    | U                 | Embryonic day 14.5 | wgEncodeEM002494 | GSM918752 |
| Whole Brain     | 2 | Input                    | U                 | Embryonic day 14.5 | wgEncodeEM002494 | GSM918752 |
| Whole Brain     | 1 | POL2 (MMS-126R)          | U                 | Embryonic day 14.5 | wgEncodeEM002596 | GSM918706 |
| Whole Brain     | 2 | POL2 (MMS-126R)          | U                 | Embryonic day 14.5 | wgEncodeEM002596 | GSM918706 |
| CH12            | 2 | PAX5 (ab12000)           |                   |                    | wgEncodeEM002353 | GSM923584 |
| CH12            | 1 | PAX5 (ab12000)           |                   |                    | wgEncodeEM002353 | GSM923584 |
| CH12            | 2 | Input                    |                   |                    | wgEncodeEM001923 | GSM923569 |
| CH12            | 1 | Input                    |                   |                    | wgEncodeEM001923 | GSM923569 |
| CH12            | 2 | CTCF (07-729)            |                   |                    | wgEncodeEM001922 | GSM923568 |
| CH12            | 1 | CTCF (07-729)            |                   |                    | wgEncodeEM001922 | GSM923568 |
| Erythroblast    | 3 | TAL1 (sc-12984)          |                   |                    | wgEncodeEM002359 | GSM923582 |
| Erythroblast    | 2 | TAL1 (sc-12984)          |                   |                    | wgEncodeEM002359 | GSM923582 |
| Erythroblast    | 1 | TAL1 (sc-12984)          |                   |                    | wgEncodeEM002359 | GSM923582 |
| Erythroblast    | 2 | Input                    |                   |                    | wgEncodeEM002350 | GSM923585 |
| Erythroblast    | 1 | Input                    |                   |                    | wgEncodeEM002350 | GSM923585 |
| Erythroblast    | 2 | GATA1 (sc-265)           |                   |                    | wgEncodeEM002349 | GSM923575 |
| Erythroblast    | 1 | GATA1 (sc-265)           |                   |                    | wgEncodeEM002349 | GSM923575 |
| G1E             | 2 | TAL1 (sc-12984)          |                   |                    | wgEncodeEM001930 | GSM923579 |
| G1E             | 1 | TAL1 (sc-12984)          |                   |                    | wgEncodeEM001930 | GSM923579 |
| G1E             | 2 | Pol2-4H8 (ab5408)        |                   |                    | wgEncodeEM002354 | GSM923589 |
| G1E             | 1 | Pol2-4H8 (ab5408)        |                   |                    | wgEncodeEM002354 | GSM923589 |
| G1E             | 2 | Input                    |                   |                    | wgEncodeEM001916 | GSM923580 |
| G1E             | 1 | Input                    |                   |                    | wgEncodeEM001916 | GSM923580 |
| G1E             | 2 | GATA2 (sc-9008)          |                   |                    | wgEncodeEM002356 | GSM923587 |
| G1E             | 1 | GATA2 (sc-9008)          |                   |                    | wgEncodeEM002356 | GSM923587 |
| G1E             | 2 | GATA1 (sc-265)           |                   |                    | wgEncodeEM002358 | GSM923581 |
| G1E             | 1 | GATA1 (sc-265)           |                   |                    | wgEncodeEM002358 | GSM923581 |
| G1E             | 2 | CTCF (07-729)            |                   |                    | wgEncodeEM001925 | GSM923570 |
| G1E             | 1 | CTCF (07-729)            |                   |                    | wgEncodeEM001925 | GSM923570 |
| G1E-ER4         | 1 | None                     | GATA1 (sc-265)    | Timecourse         | wgEncodeEM003196 | GSM995440 |
| G1E-ER4         | 1 | None                     | Input             | Timecourse         | wgEncodeEM003202 | GSM995441 |
| G1E-ER4         | 1 | adiol 14 hour diff prot: | GATA1 (sc-265)    | Timecourse         | wgEncodeEM003197 | GSM995444 |
| G1E-ER4         | 1 | adiol 14 hour diff prot: | Input             | Timecourse         | wgEncodeEM003203 | GSM995440 |
| G1E-ER4         | 2 | adiol 24 hour diff prot: | CTCF (07-729)     |                    | wgEncodeEM001926 | GSM923571 |
| G1E-ER4         | 1 | adiol 24 hour diff prot: | CTCF (07-729)     |                    | wgEncodeEM001926 | GSM923571 |
| G1E-ER4         | 2 | adiol 24 hour diff prot: | GATA1 (sc-265)    |                    | wgEncodeEM001927 | GSM923572 |
| G1E-ER4         | 1 | adiol 24 hour diff prot: | GATA1 (sc-265)    |                    | wgEncodeEM001927 | GSM923572 |
| G1E-ER4         | 1 | adiol 24 hour diff prot: | GATA1 (sc-265)    | Timecourse         | wgEncodeEM003198 | GSM995449 |
| G1E-ER4         | 2 | adiol 24 hour diff prot: | GATA2 (sc-9008)   |                    | wgEncodeEM002357 | GSM923588 |
| G1E-ER4         | 1 | adiol 24 hour diff prot: | GATA2 (sc-9008)   |                    | wgEncodeEM002357 | GSM923588 |
| G1E-ER4         | 2 | adiol 24 hour diff prot: | Input             |                    | wgEncodeEM001921 | GSM923567 |
| G1E-ER4         | 1 | adiol 24 hour diff prot: | Input             |                    | wgEncodeEM001921 | GSM923567 |
| G1E-ER4         | 1 | adiol 24 hour diff prot: | Input             | Timecourse         | wgEncodeEM003204 | GSM995439 |
| G1E-ER4         | 3 | adiol 24 hour diff prot: | Pol2-4H8 (ab5408) |                    | wgEncodeEM002355 | GSM923590 |
| G1E-ER4         | 2 | adiol 24 hour diff prot: | Pol2-4H8 (ab5408) |                    | wgEncodeEM002355 | GSM923590 |
| G1E-ER4         | 1 | adiol 24 hour diff prot: | Pol2-4H8 (ab5408) |                    | wgEncodeEM002355 | GSM923590 |
| G1E-ER4         | 2 | adiol 24 hour diff prot: | TAL1 (sc-12984)   |                    | wgEncodeEM002348 | GSM923576 |
| G1E-ER4         | 1 | adiol 24 hour diff prot: | TAL1 (sc-12984)   |                    | wgEncodeEM002348 | GSM923576 |
| G1E-ER4         | 1 | adiol 30 hour diff prot: | GATA1 (sc-265)    | Timecourse         | wgEncodeEM003199 | GSM995448 |
| G1E-ER4         | 1 | adiol 30 hour diff prot: | Input             | Timecourse         | wgEncodeEM003205 | GSM995438 |
| G1E-ER4         | 1 | radiol 3 hour diff proto | GATA1 (sc-265)    | Timecourse         | wgEncodeEM003200 | GSM995443 |
| G1E-ER4         | 1 | radiol 3 hour diff proto | Input             | Timecourse         | wgEncodeEM003206 | GSM995437 |
| G1E-ER4         | 1 | radiol 7 hour diff proto | GATA1 (sc-265)    | Timecourse         | wgEncodeEM003201 | GSM995442 |
| G1E-ER4         | 1 | radiol 7 hour diff proto | Input             | Timecourse         | wgEncodeEM003207 | GSM995436 |
| MEL             | 2 | TAL1 (sc-12984)          |                   |                    | wgEncodeEM002360 | GSM923578 |
| MEL             | 1 | TAL1 (sc-12984)          |                   |                    | wgEncodeEM002360 | GSM923578 |
| MEL             | 2 | Pol2-4H8 (ab5408)        |                   |                    | wgEncodeEM002361 | GSM923577 |
| MEL             | 1 | Pol2-4H8 (ab5408)        |                   |                    | wgEncodeEM002361 | GSM923577 |
| MEL             | 2 | Input                    |                   |                    | wgEncodeEM001929 | GSM923574 |
| MEL             | 1 | Input                    |                   |                    | wgEncodeEM001929 | GSM923574 |
| MEL             | 2 | CTCF (07-729)            |                   |                    | wgEncodeEM001928 | GSM923573 |
| MEL             | 1 | CTCF (07-729)            |                   |                    | wgEncodeEM001928 | GSM923573 |
| Megakaryocyte   | 4 | TAL1 (sc-12984)          |                   |                    | wgEncodeEM003194 | GSM995447 |
| Megakaryocyte   | 3 | TAL1 (sc-12984)          |                   |                    | wgEncodeEM003194 | GSM995447 |
| Megakaryocyte   | 2 | TAL1 (sc-12984)          |                   |                    | wgEncodeEM003194 | GSM995447 |
| Megakaryocyte   | 1 | TAL1 (sc-12984)          |                   |                    | wgEncodeEM003194 | GSM995447 |
| Megakaryocyte   | 2 | Input                    |                   |                    | wgEncodeEM002352 | GSM923583 |

|                   |               |   |                         |                  |      |                  |            |
|-------------------|---------------|---|-------------------------|------------------|------|------------------|------------|
|                   | Megakaryocyte | 1 |                         | Input            |      | wgEncodeEM002352 | GSM923583  |
|                   | Megakaryocyte | 3 |                         | GATA1 (sc-265)   |      | wgEncodeEM002351 | GSM923586  |
|                   | Megakaryocyte | 2 |                         | GATA1 (sc-265)   |      | wgEncodeEM002351 | GSM923586  |
|                   | Megakaryocyte | 1 |                         | GATA1 (sc-265)   |      | wgEncodeEM002351 | GSM923586  |
|                   | Megakaryocyte | 2 |                         | FL11 (sc-356)    |      | wgEncodeEM003195 | GSM995446  |
|                   | Megakaryocyte | 1 |                         | FL11 (sc-356)    |      | wgEncodeEM003195 | GSM995446  |
| TF, Yale/Stanford | CH12          | 1 | BHLHE40 (NB100-1800)    | IgG-rab          | None | wgEncodeEM001979 | GSM912922  |
|                   | CH12          | 2 | BHLHE40 (NB100-1800)    | IgG-rab          | None | wgEncodeEM001979 | GSM912922  |
|                   | CH12          | 1 | CHD1 (NB100-60411)      | IgG-rab          | None | wgEncodeEM003334 | GSM1003803 |
|                   | CH12          | 2 | CHD1 (NB100-60411)      | IgG-rab          | None | wgEncodeEM003334 | GSM1003803 |
|                   | CH12          | 1 | CHD2 (ab68301)          | IgG-rab          | None | wgEncodeEM001975 | GSM912926  |
|                   | CH12          | 2 | CHD2 (ab68301)          | IgG-rab          | None | wgEncodeEM001975 | GSM912926  |
|                   | CH12          | 1 | COR1/COREST (sc30181)   | IgG-rab          | None | wgEncodeEM002783 | GSM1003786 |
|                   | CH12          | 2 | COR1/COREST (sc30181)   | IgG-rab          | None | wgEncodeEM002783 | GSM1003786 |
|                   | CH12          | 1 | CTCF (sc-15914)         | IgG-rab          | None | wgEncodeEM001954 | GSM912909  |
|                   | CH12          | 2 | CTCF (sc-15914)         | IgG-rab          | None | wgEncodeEM001954 | GSM912909  |
|                   | CH12          | 1 | E2F4 (sc-866)           | IgG-rab          | None | wgEncodeEM001937 | GSM912912  |
|                   | CH12          | 2 | E2F4 (sc-866)           | IgG-rab          | None | wgEncodeEM001937 | GSM912912  |
|                   | CH12          | 1 | ETS1 (sc-350)           | IgG-rab          | None | wgEncodeEM002778 | GSM1003774 |
|                   | CH12          | 2 | ETS1 (sc-350)           | IgG-rab          | None | wgEncodeEM002778 | GSM1003774 |
|                   | CH12          | 1 | GCNS5                   | IgG-rab          | None | wgEncodeEM003335 | GSM1003802 |
|                   | CH12          | 2 | GCNS5                   | IgG-rab          | None | wgEncodeEM003335 | GSM1003802 |
|                   | CH12          | 1 | HCFC1_(NB100-68209)     | IgG-rab          | None | wgEncodeEM003345 | GSM1003795 |
|                   | CH12          | 2 | HCFC1_(NB100-68209)     | IgG-rab          | None | wgEncodeEM003345 | GSM1003795 |
|                   | CH12          | 1 | Input                   | IgG-mus          | None | wgEncodeEM001938 | GSM912918  |
|                   | CH12          | 1 | Input                   | IgG-rab          | None | wgEncodeEM001939 | GSM912917  |
|                   | CH12          | 1 | JUND (sc-74)            | IgG-rab          | None | wgEncodeEM001940 | GSM912902  |
|                   | CH12          | 2 | JUND (sc-74)            | IgG-rab          | None | wgEncodeEM001940 | GSM912902  |
|                   | CH12          | 1 | MAZ (ab85725)           | IgG-rab          | None | wgEncodeEM003336 | GSM1003801 |
|                   | CH12          | 2 | MAZ (ab85725)           | IgG-rab          | None | wgEncodeEM003336 | GSM1003801 |
|                   | CH12          | 1 | MAFK (ab50322)          | IgG-rab          | None | wgEncodeEM001980 | GSM912898  |
|                   | CH12          | 2 | MAFK (ab50322)          | IgG-rab          | None | wgEncodeEM001980 | GSM912898  |
|                   | CH12          | 1 | MAX (sc-197)            | IgG-rab          | None | wgEncodeEM001955 | GSM912908  |
|                   | CH12          | 2 | MAX (sc-197)            | IgG-rab          | None | wgEncodeEM001955 | GSM912908  |
|                   | CH12          | 1 | MX1 (AF4185)            | IgG-rab          | None | wgEncodeEM001976 | GSM912925  |
|                   | CH12          | 2 | MX1 (AF4185)            | IgG-rab          | None | wgEncodeEM001976 | GSM912925  |
|                   | CH12          | 1 | NELF-E (sc-32912)       | IgG-rab          | None | wgEncodeEM001977 | GSM912924  |
|                   | CH12          | 2 | NELF-E (sc-32912)       | IgG-rab          | None | wgEncodeEM001977 | GSM912924  |
|                   | CH12          | 1 | Nrf2 (sc-22810)         | IgG-rab          | None | wgEncodeEM003337 | GSM1003800 |
|                   | CH12          | 2 | Nrf2 (sc-22810)         | IgG-rab          | None | wgEncodeEM003337 | GSM1003800 |
|                   | CH12          | 1 | POL2 (MMS-126R)         | IgG-mus          | None | wgEncodeEM001941 | GSM912891  |
|                   | CH12          | 2 | POL2 (MMS-126R)         | IgG-mus          | None | wgEncodeEM001941 | GSM912891  |
|                   | CH12          | 1 | L2 (phospho S2) (ab505) | IgG-rab          | None | wgEncodeEM001970 | GSM912931  |
|                   | CH12          | 2 | L2 (phospho S2) (ab505) | IgG-rab          | None | wgEncodeEM001970 | GSM912931  |
|                   | CH12          | 1 | RAD21 (ab992)           | IgG-rab          | None | wgEncodeEM001956 | GSM912911  |
|                   | CH12          | 2 | RAD21 (ab992)           | IgG-rab          | None | wgEncodeEM001956 | GSM912911  |
|                   | CH12          | 1 | SIN3A (NB600-1263)      | IgG-rab          | None | wgEncodeEM002784 | GSM1003781 |
|                   | CH12          | 2 | SIN3A (NB600-1263)      | IgG-rab          | None | wgEncodeEM002784 | GSM1003781 |
|                   | CH12          | 1 | SMC3 (ab9263)           | IgG-rab          | None | wgEncodeEM001971 | GSM912930  |
|                   | CH12          | 2 | SMC3 (ab9263)           | IgG-rab          | None | wgEncodeEM001971 | GSM912930  |
|                   | CH12          | 1 | TBP (ab62126)           | IgG-mus          | None | wgEncodeEM001942 | GSM912900  |
|                   | CH12          | 2 | TBP (ab62126)           | IgG-mus          | None | wgEncodeEM001942 | GSM912900  |
|                   | CH12          | 1 | UBF (sc-13125)          | IgG-rab          | None | wgEncodeEM002786 | GSM1003783 |
|                   | CH12          | 2 | UBF (sc-13125)          | IgG-rab          | None | wgEncodeEM002786 | GSM1003783 |
|                   | CH12          | 1 | USF2 (ab60931)          | IgG-mus          | None | wgEncodeEM001957 | GSM912910  |
|                   | CH12          | 2 | USF2 (ab60931)          | IgG-mus          | None | wgEncodeEM001957 | GSM912910  |
|                   | CH12          | 1 | C3H11A_(NB100-7465)     | IgG-rab          | None | wgEncodeEM003346 | GSM1003792 |
|                   | CH12          | 2 | C3H11A_(NB100-7465)     | IgG-rab          | None | wgEncodeEM003346 | GSM1003792 |
|                   | CH12          | 1 | ZKSCAN1 (HPA006672)     | IgG-rab          | None | wgEncodeEM002787 | GSM1003782 |
|                   | CH12          | 2 | ZKSCAN1 (HPA006672)     | IgG-rab          | None | wgEncodeEM002787 | GSM1003782 |
|                   | CH12          | 1 | ZMIZ1 (ab65767)         | IgG-rab          | None | wgEncodeEM003347 | GSM1003793 |
|                   | CH12          | 2 | ZMIZ1 (ab65767)         | IgG-rab          | None | wgEncodeEM003347 | GSM1003793 |
|                   | CH12          | 1 | ZNF384 (HPA004051)      | IgG-rab          | None | wgEncodeEM003348 | GSM1003796 |
|                   | CH12          | 2 | ZNF384 (HPA004051)      | IgG-rab          | None | wgEncodeEM003348 | GSM1003796 |
|                   | CH12          | 1 | c-Jun (sc-1694)         | IgG-rab          | None | wgEncodeEM001943 | GSM912901  |
|                   | CH12          | 2 | c-Jun (sc-1694)         | IgG-rab          | None | wgEncodeEM001943 | GSM912901  |
|                   | CH12          | 1 | c-Myc (sc-764)          | IgG-rab          | None | wgEncodeEM001944 | GSM912906  |
|                   | CH12          | 2 | c-Myc (sc-764)          | IgG-rab          | None | wgEncodeEM001944 | GSM912906  |
|                   | CH12          | 1 | P300/EP300 (sc-584)     | IgG-rab          | None | wgEncodeEM001958 | GSM912920  |
|                   | CH12          | 2 | P300/EP300 (sc-584)     | IgG-rab          | None | wgEncodeEM001958 | GSM912920  |
| ES-E14            |               | 1 | HCFC1_(NB100-68209)     | Standard Control | None | wgEncodeEM003349 | GSM1003799 |
| ES-E14            |               | 2 | HCFC1_(NB100-68209)     | Standard Control | None | wgEncodeEM003349 | GSM1003799 |
| ES-E14            |               | 1 | Input                   | Standard Control | None | wgEncodeEM002788 | GSM1003811 |
| ES-E14            |               | 1 | MAFK (ab50322)          | Standard Control | None | wgEncodeEM002794 | GSM1003809 |
| ES-E14            |               | 2 | MAFK (ab50322)          | Standard Control | None | wgEncodeEM002794 | GSM1003809 |
| ES-E14            |               | 1 | C3H11A_(NB100-7465)     | Standard Control | None | wgEncodeEM003350 | GSM1003810 |
| ES-E14            |               | 2 | C3H11A_(NB100-7465)     | Standard Control | None | wgEncodeEM003350 | GSM1003810 |
| ES-E14            |               | 1 | ZNF384 (HPA004051)      | Standard Control | None | wgEncodeEM003351 | GSM1003807 |
| ES-E14            |               | 2 | ZNF384 (HPA004051)      | Standard Control | None | wgEncodeEM003351 | GSM1003807 |
| MEL               |               | 1 | BHLHE40 (NB100-1800)    | IgG-rab          | None | wgEncodeEM003344 | GSM1003794 |
| MEL               |               | 2 | BHLHE40 (NB100-1800)    | IgG-rab          | None | wgEncodeEM003344 | GSM1003794 |
| MEL               |               | 1 | CHD1 (NB100-60411)      | IgG-rab          | None | wgEncodeEM003338 | GSM1003805 |
| MEL               |               | 2 | CHD1 (NB100-60411)      | IgG-rab          | None | wgEncodeEM003338 | GSM1003805 |
| MEL               |               | 1 | CHD2 (ab68301)          | IgG-rab          | None | wgEncodeEM001972 | GSM912929  |
| MEL               |               | 2 | CHD2 (ab68301)          | IgG-rab          | None | wgEncodeEM001972 | GSM912929  |
| MEL               |               | 1 | COR1/COREST (sc30181)   | IgG-rab          | None | wgEncodeEM003343 | GSM1003789 |
| MEL               |               | 2 | COR1/COREST (sc30181)   | IgG-rab          | None | wgEncodeEM003343 | GSM1003789 |
| MEL               |               | 1 | CTCF (sc-15914)         | IgG-rab          | None | wgEncodeEM001968 | GSM912896  |
| MEL               |               | 2 | CTCF (sc-15914)         | IgG-rab          | None | wgEncodeEM001968 | GSM912896  |

|                  |       |                          |                  |                 |                  |                  |           |
|------------------|-------|--------------------------|------------------|-----------------|------------------|------------------|-----------|
| MEL              | 1     | CTCF (sc-15914)          | Standard Control | DMSO_2.0pct     | wgEncodeEM002781 | GSM1003784       |           |
| MEL              | 2     | CTCF (sc-15914)          | Standard Control | DMSO_2.0pct     | wgEncodeEM002781 | GSM1003784       |           |
| MEL              | 1     | E2F4 (sc-866)            | IgG-rab          | None            | wgEncodeEM001953 | GSM912914        |           |
| MEL              | 2     | E2F4 (sc-866)            | IgG-rab          | None            | wgEncodeEM001953 | GSM912914        |           |
| MEL              | 1     | ETS1 (sc-350)            | IgG-rab          | None            | wgEncodeEM002789 | GSM1003777       |           |
| MEL              | 2     | ETS1 (sc-350)            | IgG-rab          | None            | wgEncodeEM002789 | GSM1003777       |           |
| MEL              | 1     | GATA1                    | IgG-rat          | None            | wgEncodeEM001945 | GSM912907        |           |
| MEL              | 2     | GATA1                    | IgG-rat          | None            | wgEncodeEM001945 | GSM912907        |           |
| MEL              | 1     | GATA1                    | Standard Control | DMSO_2.0pct     | wgEncodeEM002790 | GSM1003808       |           |
| MEL              | 2     | GATA1                    | Standard Control | DMSO_2.0pct     | wgEncodeEM002790 | GSM1003808       |           |
| MEL              | 1     | GCN5                     | IgG-rab          | None            | wgEncodeEM003339 | GSM1003804       |           |
| MEL              | 2     | GCN5                     | IgG-rab          | None            | wgEncodeEM003339 | GSM1003804       |           |
| MEL              | 1     | HCFC1_(NB100-68209)      | IgG-rab          | None            | wgEncodeEM003352 | GSM1003778       |           |
| MEL              | 2     | HCFC1_(NB100-68209)      | IgG-rab          | None            | wgEncodeEM003352 | GSM1003778       |           |
| MEL              |       | Input                    | IgG-Yale         | DMSO_2.0pct     | wgEncodeEM001963 | GSM913032        |           |
| MEL              |       | Input                    | IgG-mus          | None            | wgEncodeEM001946 | GSM912904        |           |
| MEL              |       | Input                    | IgG-rab          | None            | wgEncodeEM001947 | GSM912905        |           |
| MEL              | 1     | Input                    | IgG-rat          | DMSO_2.0pct     | wgEncodeEM002782 | GSM1003787       |           |
| MEL              |       | Input                    | IgG-rat          | None            | wgEncodeEM001948 | GSM912894        |           |
| MEL              | 1     | Input                    | Standard Control | DMSO_2.0pct     | wgEncodeEM001983 | GSM912897        |           |
| MEL              | 1     | Input                    | Standard Control | DMSO_2.0pct     | wgEncodeEM002791 | GSM1003812       |           |
| MEL              | 1     | Input                    | Standard Control | None            | wgEncodeEM001982 | GSM912916        |           |
| MEL              | 1     | JUND (sc-74)             | IgG-rab          | None            | wgEncodeEM001952 | GSM912915        |           |
| MEL              | 2     | JUND (sc-74)             | IgG-rab          | None            | wgEncodeEM001952 | GSM912915        |           |
| MEL              | 1     | MAZ (ab85725)            | IgG-rab          | None            | wgEncodeEM003340 | GSM1003790       |           |
| MEL              | 2     | MAZ (ab85725)            | IgG-rab          | None            | wgEncodeEM003340 | GSM1003790       |           |
| MEL              | 1     | MAFK (ab50322)           | IgG-rab          | None            | wgEncodeEM001981 | GSM912899        |           |
| MEL              | 2     | MAFK (ab50322)           | IgG-rab          | None            | wgEncodeEM001981 | GSM912899        |           |
| MEL              | 1     | MAFK (ab50322)           | Standard Control | DMSO_2.0pct     | wgEncodeEM002792 | GSM1003806       |           |
| MEL              | 2     | MAFK (ab50322)           | Standard Control | DMSO_2.0pct     | wgEncodeEM002792 | GSM1003806       |           |
| MEL              | 1     | MAX (sc-197)             | IgG-rab          | None            | wgEncodeEM001959 | GSM912919        |           |
| MEL              | 2     | MAX (sc-197)             | IgG-rab          | None            | wgEncodeEM001959 | GSM912919        |           |
| MEL              | 1     | MX1 (AF4185)             | IgG-rab          | None            | wgEncodeEM001973 | GSM912928        |           |
| MEL              | 2     | MX1 (AF4185)             | IgG-rab          | None            | wgEncodeEM001973 | GSM912928        |           |
| MEL              | 1     | NELF-E (sc-32912)        | IgG-rab          | None            | wgEncodeEM001964 | GSM912932        |           |
| MEL              | 2     | NELF-E (sc-32912)        | IgG-rab          | None            | wgEncodeEM001964 | GSM912932        |           |
| MEL              | 1     | Nrf2 (sc-22810)          | IgG-rab          | None            | wgEncodeEM003341 | GSM1003791       |           |
| MEL              | 2     | Nrf2 (sc-22810)          | IgG-rab          | None            | wgEncodeEM003341 | GSM1003791       |           |
| MEL              | 1     | POL2 (MMS-126R)          | IgG-mus          | None            | wgEncodeEM001949 | GSM912895        |           |
| MEL              | 2     | POL2 (MMS-126R)          | IgG-mus          | None            | wgEncodeEM001949 | GSM912895        |           |
| MEL              | 1     | POL2 (MMS-126R)          | IgG-rab          | DMSO_2.0pct     | wgEncodeEM002779 | GSM1003775       |           |
| MEL              | 2     | POL2 (MMS-126R)          | IgG-rab          | DMSO_2.0pct     | wgEncodeEM002779 | GSM1003775       |           |
| MEL              | 1     | L2 (phospho S2) (ab5050) | IgG-rab          | None            | wgEncodeEM001974 | GSM912927        |           |
| MEL              | 2     | L2 (phospho S2) (ab5050) | IgG-rab          | None            | wgEncodeEM001974 | GSM912927        |           |
| MEL              | 1     | RAD21 (ab992)            | IgG-rab          | DMSO_2.0pct     | wgEncodeEM001965 | GSM912933        |           |
| MEL              | 2     | RAD21 (ab992)            | IgG-rab          | DMSO_2.0pct     | wgEncodeEM001965 | GSM912933        |           |
| MEL              | 1     | RAD21 (ab992)            | IgG-rab          | None            | wgEncodeEM001966 | GSM912935        |           |
| MEL              | 2     | RAD21 (ab992)            | IgG-rab          | None            | wgEncodeEM001966 | GSM912935        |           |
| MEL              | 1     | SIN3A (NB600-1263)       | IgG-rab          | None            | wgEncodeEM002785 | GSM1003780       |           |
| MEL              | 2     | SIN3A (NB600-1263)       | IgG-rab          | None            | wgEncodeEM002785 | GSM1003780       |           |
| MEL              | 1     | SMC3 (ab9263)            | IgG-rab          | None            | wgEncodeEM001978 | GSM912923        |           |
| MEL              | 2     | SMC3 (ab9263)            | IgG-rab          | None            | wgEncodeEM001978 | GSM912923        |           |
| MEL              | 1     | TBP (ab62126)            | IgG-mus          | None            | wgEncodeEM001950 | GSM912913        |           |
| MEL              | 2     | TBP (ab62126)            | IgG-mus          | None            | wgEncodeEM001950 | GSM912913        |           |
| MEL              | 1     | UBF (sc-13125)           | IgG-mus          | None            | wgEncodeEM003342 | GSM1003788       |           |
| MEL              | 2     | UBF (sc-13125)           | IgG-mus          | None            | wgEncodeEM003342 | GSM1003788       |           |
| MEL              | 1     | USF2 (ab60931)           | IgG-mus          | None            | wgEncodeEM001960 | GSM912892        |           |
| MEL              | 2     | USF2 (ab60931)           | IgG-mus          | None            | wgEncodeEM001960 | GSM912892        |           |
| MEL              | 1     | USF2 (ab60931)           | IgG-rab          | None            | wgEncodeEM002780 | GSM1003785       |           |
| MEL              | 2     | USF2 (ab60931)           | IgG-rab          | None            | wgEncodeEM002780 | GSM1003785       |           |
| MEL              | 1     | C3H11A_(NB100-7465)      | IgG-rab          | None            | wgEncodeEM003353 | GSM1003776       |           |
| MEL              | 2     | C3H11A_(NB100-7465)      | IgG-rab          | None            | wgEncodeEM003353 | GSM1003776       |           |
| MEL              | 1     | ZKSCAN1 (HPA006672)      | IgG-rab          | None            | wgEncodeEM002793 | GSM1003779       |           |
| MEL              | 2     | ZKSCAN1 (HPA006672)      | IgG-rab          | None            | wgEncodeEM002793 | GSM1003779       |           |
| MEL              | 1     | ZMIZ1 (ab65767)          | IgG-rab          | None            | wgEncodeEM003354 | GSM1003798       |           |
| MEL              | 2     | ZMIZ1 (ab65767)          | IgG-rab          | None            | wgEncodeEM003354 | GSM1003798       |           |
| MEL              | 1     | ZNF384 (HPA004051)       | IgG-rab          | None            | wgEncodeEM003355 | GSM1003797       |           |
| MEL              | 2     | ZNF384 (HPA004051)       | IgG-rab          | None            | wgEncodeEM003355 | GSM1003797       |           |
| MEL              | 1     | c-Myb (sc-7874)          | IgG-rab          | None            | wgEncodeEM001967 | GSM912903        |           |
| MEL              | 2     | c-Myb (sc-7874)          | IgG-rab          | None            | wgEncodeEM001967 | GSM912903        |           |
| MEL              | 1     | c-Myc (sc-764)           | IgG-rab          | None            | wgEncodeEM001951 | GSM912934        |           |
| MEL              | 2     | c-Myc (sc-764)           | IgG-rab          | None            | wgEncodeEM001951 | GSM912934        |           |
| MEL              | 1     | P300/EP300 (sc-585)      | IgG-rab          | None            | wgEncodeEM001969 | GSM912921        |           |
| MEL              | 2     | P300/EP300 (sc-585)      | IgG-rab          | None            | wgEncodeEM001969 | GSM912921        |           |
| MEL              | 1     | P300/EP300 (sc-584)      | IgG-rab          | None            | wgEncodeEM001961 | GSM912893        |           |
| MEL              | 2     | P300/EP300 (sc-584)      | IgG-rab          | None            | wgEncodeEM001961 | GSM912893        |           |
| Histone, CalTech | C2C12 | H3K27me3 (07-449)        | 32bp             | EqS_2.0pct_60hr | PCR 2-round      | wgEncodeEM002143 | GSM918414 |
|                  | C2C12 | H3K27me3 (07-449)        | 32bp             | None            | PCR 2-round      | wgEncodeEM002138 | GSM918408 |
|                  | C2C12 | H3K36me3 (ab9050)        | Control 50bp     | EqS_2.0pct_60hr | PCR 1-round      | wgEncodeEM002139 | GSM918409 |
|                  | C2C12 | H3K36me3 (ab9050)        | Control 50bp     | None            | PCR 1-round      | wgEncodeEM002140 | GSM918417 |
|                  | C2C12 | H3K4me2 (ab32356)        | Control 50bp     | EqS_2.0pct_60hr | PCR 1-round      | wgEncodeEM002144 | GSM918413 |
|                  | C2C12 | H3K4me3 (07-473)         | Control 50bp     | EqS_2.0pct_60hr | PCR 1-round      | wgEncodeEM002141 | GSM918416 |
|                  | C2C12 | H3K4me3 (07-473)         | Control 50bp     | None            | PCR 1-round      | wgEncodeEM002142 | GSM918415 |
|                  | C2C12 | H3K79me2 (ab3594)        | Control 50bp     | EqS_2.0pct_60hr | PCR 1-round      | wgEncodeEM002145 | GSM918412 |
|                  | C2C12 | H3K79me2 (ab3594)        | Control 50bp     | None            | PCR 1-round      | wgEncodeEM002146 | GSM918411 |
|                  | C2C12 | H3K79me3 (ab2621)        | Control 50bp     | None            | PCR 1-round      | wgEncodeEM002147 | GSM918410 |
|                  | C2C12 | H3ac (06-599)            | 32bp             | EqS_2.0pct_24hr | PCR 2-round      | wgEncodeEM002148 | GSM918423 |
|                  | C2C12 | H3ac (06-599)            | 32bp             | None            | PCR 2-round      | wgEncodeEM002149 | GSM918422 |
|                  | C2C12 | Input                    | 32bp             | EqS_2.0pct_24hr | PCR 2-round      | wgEncodeEM002110 | GSM918418 |

Histone, LICR

|                             |   |                   |              |                                |             |                  |            |
|-----------------------------|---|-------------------|--------------|--------------------------------|-------------|------------------|------------|
| C2C12                       | 1 | Input             | 32bp         | EqS_2.0pct_60hr                | PCR 2-round | wgEncodeEM002112 | GSM918420  |
| C2C12                       | 1 | Input             | 32bp         | None                           | PCR 2-round | wgEncodeEM002111 | GSM918419  |
| C2C12                       | 1 | Input             | Control 50bp | EqS_2.0pct_60hr                | PCR 1-round | wgEncodeEM002126 | GSM918407  |
| C2C12                       | 1 | Input             | Control 50bp | None                           | PCR 1-round | wgEncodeEM002113 | GSM918421  |
| B-cell (CD43-)              | 1 | H3K27me3 (07-449) | M            | Adult 8 weeks                  | C57BL/6     | wgEncodeEM002719 | GSM1000088 |
| B-cell (CD43-)              | 2 | H3K27me3 (07-449) | M            | Adult 8 weeks                  | C57BL/6     | wgEncodeEM002719 | GSM1000088 |
| B-cell (CD43-)              | 1 | H3K36me3 (ab9050) | M            | Adult 8 weeks                  | C57BL/6     | wgEncodeEM002720 | GSM1000148 |
| B-cell (CD43-)              | 2 | H3K36me3 (ab9050) | M            | Adult 8 weeks                  | C57BL/6     | wgEncodeEM002720 | GSM1000148 |
| B-cell (CD43-)              | 1 | Input             | M            | Adult 8 weeks                  | C57BL/6     | wgEncodeEM003163 | GSM1000120 |
| B-cell (CD43-)              | 2 | Input             | M            | Adult 8 weeks                  | C57BL/6     | wgEncodeEM003163 | GSM1000120 |
| Brown Adipose Tissue        | 1 | H3K27ac (ab4729)  | M            | Adult 24 weeks                 | C57BL/6     | wgEncodeEM002653 | GSM1000071 |
| Brown Adipose Tissue        | 2 | H3K27ac (ab4729)  | M            | Adult 24 weeks                 | C57BL/6     | wgEncodeEM002653 | GSM1000071 |
| Brown Adipose Tissue        | 1 | H3K4me1 (ab8895)  | M            | Adult 24 weeks                 | C57BL/6     | wgEncodeEM002654 | GSM1000076 |
| Brown Adipose Tissue        | 2 | H3K4me1 (ab8895)  | M            | Adult 24 weeks                 | C57BL/6     | wgEncodeEM002654 | GSM1000076 |
| Brown Adipose Tissue        | 1 | H3K4me3 (07-473)  | M            | Adult 24 weeks                 | C57BL/6     | wgEncodeEM002655 | GSM1000075 |
| Brown Adipose Tissue        | 2 | H3K4me3 (07-473)  | M            | Adult 24 weeks                 | C57BL/6     | wgEncodeEM002655 | GSM1000075 |
| Brown Adipose Tissue        | 1 | Input             | M            | Adult 24 weeks                 | C57BL/6     | wgEncodeEM002656 | GSM1000201 |
| Brown Adipose Tissue        | 2 | Input             | M            | Adult 24 weeks                 | C57BL/6     | wgEncodeEM002656 | GSM1000201 |
| Bone Marrow Derived Macroph | 1 | H3K27ac (ab4729)  | F            | Adult 8 weeks                  | C57BL/6     | wgEncodeEM002657 | GSM1000074 |
| Bone Marrow Derived Macroph | 2 | H3K27ac (ab4729)  | F            | Adult 8 weeks                  | C57BL/6     | wgEncodeEM002657 | GSM1000074 |
| Bone Marrow Derived Macroph | 1 | H3K4me1 (ab8895)  | F            | Adult 8 weeks                  | C57BL/6     | wgEncodeEM002658 | GSM1000066 |
| Bone Marrow Derived Macroph | 2 | H3K4me1 (ab8895)  | F            | Adult 8 weeks                  | C57BL/6     | wgEncodeEM002658 | GSM1000066 |
| Bone Marrow Derived Macroph | 1 | H3K4me3 (07-473)  | F            | Adult 8 weeks                  | C57BL/6     | wgEncodeEM002659 | GSM1000065 |
| Bone Marrow Derived Macroph | 2 | H3K4me3 (07-473)  | F            | Adult 8 weeks                  | C57BL/6     | wgEncodeEM002659 | GSM1000065 |
| Bone Marrow Derived Macroph | 1 | Input             | F            | Adult 8 weeks                  | C57BL/6     | wgEncodeEM002660 | GSM1000206 |
| Bone Marrow Derived Macroph | 2 | Input             | F            | Adult 8 weeks                  | C57BL/6     | wgEncodeEM002660 | GSM1000206 |
| Bone Marrow                 | 1 | H3K27ac (ab4729)  | M            | Adult 8 weeks                  | C57BL/6     | wgEncodeEM002478 | GSM1000108 |
| Bone Marrow                 | 2 | H3K27ac (ab4729)  | M            | Adult 8 weeks                  | C57BL/6     | wgEncodeEM002478 | GSM1000108 |
| Bone Marrow                 | 1 | H3K4me1 (ab8895)  | M            | Adult 8 weeks                  | C57BL/6     | wgEncodeEM001435 | GSM769024  |
| Bone Marrow                 | 2 | H3K4me1 (ab8895)  | M            | Adult 8 weeks                  | C57BL/6     | wgEncodeEM001435 | GSM769024  |
| Bone Marrow                 | 1 | H3K4me3 (07-473)  | M            | Adult 8 weeks                  | C57BL/6     | wgEncodeEM001436 | GSM769021  |
| Bone Marrow                 | 2 | H3K4me3 (07-473)  | M            | Adult 8 weeks                  | C57BL/6     | wgEncodeEM001436 | GSM769021  |
| Bone Marrow                 | 1 | Input             | M            | Adult 8 weeks                  | C57BL/6     | wgEncodeEM001447 | GSM769011  |
| Bone Marrow                 | 2 | Input             | M            | Adult 8 weeks                  | C57BL/6     | wgEncodeEM001447 | GSM769011  |
| CH12                        | 1 | H3K27ac (ab4729)  | F            | Immortal cells                 | C57BL/6     | wgEncodeEM003167 | GSM1000117 |
| CH12                        | 2 | H3K27ac (ab4729)  | F            | Immortal cells                 | C57BL/6     | wgEncodeEM003167 | GSM1000117 |
| CH12                        | 1 | H3K36me3 (ab9050) | F            | Immortal cells                 | C57BL/6     | wgEncodeEM002707 | GSM1000091 |
| CH12                        | 2 | H3K36me3 (ab9050) | F            | Immortal cells                 | C57BL/6     | wgEncodeEM002707 | GSM1000091 |
| CH12                        | 1 | H3K4me1 (ab8895)  | F            | Immortal cells                 | C57BL/6     | wgEncodeEM003165 | GSM1000119 |
| CH12                        | 2 | H3K4me1 (ab8895)  | F            | Immortal cells                 | C57BL/6     | wgEncodeEM003165 | GSM1000119 |
| CH12                        | 1 | H3K4me2 (ab7766)  | F            | Immortal cells                 | C57BL/6     | wgEncodeEM003166 | GSM1000116 |
| CH12                        | 2 | H3K4me2 (ab7766)  | F            | Immortal cells                 | C57BL/6     | wgEncodeEM003166 | GSM1000116 |
| CH12                        | 1 | H3K4me3 (07-473)  | F            | Immortal cells                 | C57BL/6     | wgEncodeEM003168 | GSM1000114 |
| CH12                        | 2 | H3K4me3 (07-473)  | F            | Immortal cells                 | C57BL/6     | wgEncodeEM003168 | GSM1000114 |
| CH12                        | 1 | H3K79me2 (39143)  | F            | Immortal cells                 | C57BL/6     | wgEncodeEM003170 | GSM1000122 |
| CH12                        | 2 | H3K79me2 (39143)  | F            | Immortal cells                 | C57BL/6     | wgEncodeEM003170 | GSM1000122 |
| CH12                        | 1 | H3K9ac (ab4441)   | F            | Immortal cells                 | C57BL/6     | wgEncodeEM003169 | GSM1000115 |
| CH12                        | 2 | H3K9ac (ab4441)   | F            | Immortal cells                 | C57BL/6     | wgEncodeEM003169 | GSM1000115 |
| CH12                        | 1 | Input             | F            | Immortal cells                 | C57BL/6     | wgEncodeEM003164 | GSM1000118 |
| CH12                        | 2 | Input             | F            | Immortal cells                 | C57BL/6     | wgEncodeEM003164 | GSM1000118 |
| Cerebellum                  | 1 | H3K27ac (ab4729)  | M            | Adult 8 weeks                  | C57BL/6     | wgEncodeEM002495 | GSM1000097 |
| Cerebellum                  | 2 | H3K27ac (ab4729)  | M            | Adult 8 weeks                  | C57BL/6     | wgEncodeEM002495 | GSM1000097 |
| Cerebellum                  | 1 | H3K27me3 (07-449) | M            | Adult 8 weeks                  | C57BL/6     | wgEncodeEM002708 | GSM1000090 |
| Cerebellum                  | 2 | H3K27me3 (07-449) | M            | Adult 8 weeks                  | C57BL/6     | wgEncodeEM002708 | GSM1000090 |
| Cerebellum                  | 1 | H3K4me1 (ab8895)  | M            | Adult 8 weeks                  | C57BL/6     | wgEncodeEM001440 | GSM769018  |
| Cerebellum                  | 2 | H3K4me1 (ab8895)  | M            | Adult 8 weeks                  | C57BL/6     | wgEncodeEM001440 | GSM769018  |
| Cerebellum                  | 1 | H3K4me3 (07-473)  | M            | Adult 8 weeks                  | C57BL/6     | wgEncodeEM001439 | GSM769027  |
| Cerebellum                  | 2 | H3K4me3 (07-473)  | M            | Adult 8 weeks                  | C57BL/6     | wgEncodeEM001439 | GSM769027  |
| Cerebellum                  | 1 | Input             | M            | Adult 8 weeks                  | C57BL/6     | wgEncodeEM001448 | GSM769020  |
| Cerebellum                  | 2 | Input             | M            | Adult 8 weeks                  | C57BL/6     | wgEncodeEM001448 | GSM769020  |
| Cortex                      | 1 | H3K27ac (ab4729)  | M            | Adult 8 weeks                  | C57BL/6     | wgEncodeEM002496 | GSM1000100 |
| Cortex                      | 2 | H3K27ac (ab4729)  | M            | Adult 8 weeks                  | C57BL/6     | wgEncodeEM002496 | GSM1000100 |
| Cortex                      | 1 | H3K4me1 (ab8895)  | M            | Adult 8 weeks                  | C57BL/6     | wgEncodeEM001437 | GSM769022  |
| Cortex                      | 2 | H3K4me1 (ab8895)  | M            | Adult 8 weeks                  | C57BL/6     | wgEncodeEM001437 | GSM769022  |
| Cortex                      | 1 | H3K4me3 (07-473)  | M            | Adult 8 weeks                  | C57BL/6     | wgEncodeEM001438 | GSM769026  |
| Cortex                      | 2 | H3K4me3 (07-473)  | M            | Adult 8 weeks                  | C57BL/6     | wgEncodeEM001438 | GSM769026  |
| Cortex                      | 1 | Input             | M            | Adult 8 weeks                  | C57BL/6     | wgEncodeEM001449 | GSM769019  |
| Cortex                      | 2 | Input             | M            | Adult 8 weeks                  | C57BL/6     | wgEncodeEM001449 | GSM769019  |
| ES-Bruce4                   | 1 | H3K27ac (ab4729)  | M            | Embryonic day 0 (stem c        | C57BL/6     | wgEncodeEM002497 | GSM1000099 |
| ES-Bruce4                   | 2 | H3K27ac (ab4729)  | M            | Embryonic day 0 (stem c        | C57BL/6     | wgEncodeEM002497 | GSM1000099 |
| ES-Bruce4                   | 1 | H3K27me3 (07-449) | M            | Embryonic day 0 (stem c        | C57BL/6     | wgEncodeEM002709 | GSM1000089 |
| ES-Bruce4                   | 2 | H3K27me3 (07-449) | M            | Embryonic day 0 (stem c        | C57BL/6     | wgEncodeEM002709 | GSM1000089 |
| ES-Bruce4                   | 1 | H3K36me3 (ab9050) | M            | Embryonic day 0 (stem c        | C57BL/6     | wgEncodeEM002710 | GSM1000109 |
| ES-Bruce4                   | 2 | H3K36me3 (ab9050) | M            | Embryonic day 0 (stem c        | C57BL/6     | wgEncodeEM002710 | GSM1000109 |
| ES-Bruce4                   | 1 | H3K4me1 (ab8895)  | M            | Embryonic day 0 (stem c        | C57BL/6     | wgEncodeEM001681 | GSM769009  |
| ES-Bruce4                   | 2 | H3K4me1 (ab8895)  | M            | Embryonic day 0 (stem c        | C57BL/6     | wgEncodeEM001681 | GSM769009  |
| ES-Bruce4                   | 1 | H3K4me3 (07-473)  | M            | Embryonic day 0 (stem c        | C57BL/6     | wgEncodeEM001682 | GSM769008  |
| ES-Bruce4                   | 2 | H3K4me3 (07-473)  | M            | Embryonic day 0 (stem c        | C57BL/6     | wgEncodeEM001682 | GSM769008  |
| ES-Bruce4                   | 1 | H3K9ac (ab4441)   | M            | Embryonic day 0 (stem c        | C57BL/6     | wgEncodeEM003176 | GSM1000127 |
| ES-Bruce4                   | 2 | H3K9ac (ab4441)   | M            | Embryonic day 0 (stem c        | C57BL/6     | wgEncodeEM003176 | GSM1000127 |
| ES-Bruce4                   | 1 | H3K9me3 (ab8898)  | M            | Embryonic day 0 (stem c        | C57BL/6     | wgEncodeEM002721 | GSM1000147 |
| ES-Bruce4                   | 2 | H3K9me3 (ab8898)  | M            | Embryonic day 0 (stem c        | C57BL/6     | wgEncodeEM002721 | GSM1000147 |
| ES-Bruce4                   | 1 | Input             | M            | Embryonic day 0 (stem c        | C57BL/6     | wgEncodeEM001683 | GSM769010  |
| ES-Bruce4                   | 2 | Input             | M            | Embryonic day 0 (stem c        | C57BL/6     | wgEncodeEM001683 | GSM769010  |
| ES-E14                      | 1 | H3K27ac (ab4729)  | M            | Embryonic day 0 (stem (129/Ola |             | wgEncodeEM003174 | GSM1000126 |
| ES-E14                      | 2 | H3K27ac (ab4729)  | M            | Embryonic day 0 (stem (129/Ola |             | wgEncodeEM003174 | GSM1000126 |
| ES-E14                      | 1 | H3K36me3 (ab9050) | M            | Embryonic day 0 (stem (129/Ola |             | wgEncodeEM003175 | GSM1000125 |
| ES-E14                      | 2 | H3K36me3 (ab9050) | M            | Embryonic day 0 (stem (129/Ola |             | wgEncodeEM003175 | GSM1000125 |
| ES-E14                      | 1 | H3K4me1 (ab8895)  | M            | Embryonic day 0 (stem (129/Ola |             | wgEncodeEM003171 | GSM1000121 |

|        |   |                   |   |                                |                  |                  |            |
|--------|---|-------------------|---|--------------------------------|------------------|------------------|------------|
| ES-E14 | 2 | H3K4me1 (ab8895)  | M | Embryonic day 0 (stem c129/Ola | wgEncodeEM003171 | GSM1000121       |            |
| ES-E14 | 1 | H3K4me3 (07-473)  | M | Embryonic day 0 (stem c129/Ola | wgEncodeEM003172 | GSM1000124       |            |
| ES-E14 | 2 | H3K4me3 (07-473)  | M | Embryonic day 0 (stem c129/Ola | wgEncodeEM003172 | GSM1000124       |            |
| ES-E14 | 1 | H3K9ac (ab4441)   | M | Embryonic day 0 (stem c129/Ola | wgEncodeEM003173 | GSM1000123       |            |
| ES-E14 | 2 | H3K9ac (ab4441)   | M | Embryonic day 0 (stem c129/Ola | wgEncodeEM003173 | GSM1000123       |            |
| Heart  | 1 | H3K27ac (ab4729)  | M | Adult 8 weeks                  | C57BL/6          | wgEncodeEM002498 | GSM1000093 |
| Heart  | 2 | H3K27ac (ab4729)  | M | Adult 8 weeks                  | C57BL/6          | wgEncodeEM002498 | GSM1000093 |
| Heart  | 1 | H3K27ac (ab4729)  | U | Embryonic day 14.5             | C57BL/6          | wgEncodeEM002503 | GSM1000137 |
| Heart  | 2 | H3K27ac (ab4729)  | U | Embryonic day 14.5             | C57BL/6          | wgEncodeEM002503 | GSM1000137 |
| Heart  | 1 | H3K27me3 (07-449) | M | Adult 8 weeks                  | C57BL/6          | wgEncodeEM002637 | GSM1000131 |
| Heart  | 2 | H3K27me3 (07-449) | M | Adult 8 weeks                  | C57BL/6          | wgEncodeEM002637 | GSM1000131 |
| Heart  | 1 | H3K36me3 (ab9050) | M | Adult 8 weeks                  | C57BL/6          | wgEncodeEM002638 | GSM1000130 |
| Heart  | 2 | H3K36me3 (ab9050) | M | Adult 8 weeks                  | C57BL/6          | wgEncodeEM002638 | GSM1000130 |
| Heart  | 1 | H3K4me1 (ab8895)  | M | Adult 8 weeks                  | C57BL/6          | wgEncodeEM001433 | GSM769025  |
| Heart  | 2 | H3K4me1 (ab8895)  | M | Adult 8 weeks                  | C57BL/6          | wgEncodeEM001433 | GSM769025  |
| Heart  | 1 | H3K4me1 (ab8895)  | U | Embryonic day 14.5             | C57BL/6          | wgEncodeEM002504 | GSM1000136 |
| Heart  | 2 | H3K4me1 (ab8895)  | U | Embryonic day 14.5             | C57BL/6          | wgEncodeEM002504 | GSM1000136 |
| Heart  | 1 | H3K4me3 (07-473)  | M | Adult 8 weeks                  | C57BL/6          | wgEncodeEM001441 | GSM769017  |
| Heart  | 2 | H3K4me3 (07-473)  | M | Adult 8 weeks                  | C57BL/6          | wgEncodeEM001441 | GSM769017  |
| Heart  | 1 | H3K4me3 (07-473)  | U | Embryonic day 14.5             | C57BL/6          | wgEncodeEM002505 | GSM1000135 |
| Heart  | 2 | H3K4me3 (07-473)  | U | Embryonic day 14.5             | C57BL/6          | wgEncodeEM002505 | GSM1000135 |
| Heart  | 1 | H3K79me2 (39143)  | M | Adult 8 weeks                  | C57BL/6          | wgEncodeEM002639 | GSM1000129 |
| Heart  | 2 | H3K79me2 (39143)  | M | Adult 8 weeks                  | C57BL/6          | wgEncodeEM002639 | GSM1000129 |
| Heart  | 1 | H3K9ac (ab4441)   | M | Adult 8 weeks                  | C57BL/6          | wgEncodeEM002640 | GSM1000149 |
| Heart  | 2 | H3K9ac (ab4441)   | M | Adult 8 weeks                  | C57BL/6          | wgEncodeEM002640 | GSM1000149 |
| Heart  | 1 | Input             | M | Adult 8 weeks                  | C57BL/6          | wgEncodeEM001450 | GSM769032  |
| Heart  | 2 | Input             | M | Adult 8 weeks                  | C57BL/6          | wgEncodeEM001450 | GSM769032  |
| Heart  | 1 | Input             | U | Embryonic day 14.5             | C57BL/6          | wgEncodeEM002506 | GSM1000208 |
| Heart  | 2 | Input             | U | Embryonic day 14.5             | C57BL/6          | wgEncodeEM002506 | GSM1000208 |
| Kidney | 1 | H3K27ac (ab4729)  | M | Adult 8 weeks                  | C57BL/6          | wgEncodeEM002499 | GSM1000092 |
| Kidney | 2 | H3K27ac (ab4729)  | M | Adult 8 weeks                  | C57BL/6          | wgEncodeEM002499 | GSM1000092 |
| Kidney | 1 | H3K27me3 (07-449) | M | Adult 8 weeks                  | C57BL/6          | wgEncodeEM002711 | GSM1000077 |
| Kidney | 2 | H3K27me3 (07-449) | M | Adult 8 weeks                  | C57BL/6          | wgEncodeEM002711 | GSM1000077 |
| Kidney | 1 | H3K36me3 (ab9050) | M | Adult 8 weeks                  | C57BL/6          | wgEncodeEM002712 | GSM1000063 |
| Kidney | 2 | H3K36me3 (ab9050) | M | Adult 8 weeks                  | C57BL/6          | wgEncodeEM002712 | GSM1000063 |
| Kidney | 1 | H3K4me1 (ab8895)  | M | Adult 8 weeks                  | C57BL/6          | wgEncodeEM001434 | GSM769023  |
| Kidney | 2 | H3K4me1 (ab8895)  | M | Adult 8 weeks                  | C57BL/6          | wgEncodeEM001434 | GSM769023  |
| Kidney | 1 | H3K4me3 (07-473)  | M | Adult 8 weeks                  | C57BL/6          | wgEncodeEM001442 | GSM769016  |
| Kidney | 2 | H3K4me3 (07-473)  | M | Adult 8 weeks                  | C57BL/6          | wgEncodeEM001442 | GSM769016  |
| Kidney | 1 | Input             | M | Adult 8 weeks                  | C57BL/6          | wgEncodeEM001451 | GSM769033  |
| Kidney | 2 | Input             | M | Adult 8 weeks                  | C57BL/6          | wgEncodeEM001451 | GSM769033  |
| Limb   | 1 | H3K27ac (ab4729)  | U | Embryonic day 14.5             | C57BL/6          | wgEncodeEM002479 | GSM1000107 |
| Limb   | 2 | H3K27ac (ab4729)  | U | Embryonic day 14.5             | C57BL/6          | wgEncodeEM002479 | GSM1000107 |
| Limb   | 1 | H3K4me1 (ab8895)  | U | Embryonic day 14.5             | C57BL/6          | wgEncodeEM002480 | GSM1000085 |
| Limb   | 2 | H3K4me1 (ab8895)  | U | Embryonic day 14.5             | C57BL/6          | wgEncodeEM002480 | GSM1000085 |
| Limb   | 1 | H3K4me3 (07-473)  | U | Embryonic day 14.5             | C57BL/6          | wgEncodeEM002481 | GSM1000086 |
| Limb   | 2 | H3K4me3 (07-473)  | U | Embryonic day 14.5             | C57BL/6          | wgEncodeEM002481 | GSM1000086 |
| Limb   | 1 | Input             | U | Embryonic day 14.5             | C57BL/6          | wgEncodeEM002482 | GSM1000202 |
| Limb   | 2 | Input             | U | Embryonic day 14.5             | C57BL/6          | wgEncodeEM002482 | GSM1000202 |
| Liver  | 1 | H3K27ac (ab4729)  | M | Adult 8 weeks                  | C57BL/6          | wgEncodeEM002500 | GSM1000140 |
| Liver  | 2 | H3K27ac (ab4729)  | M | Adult 8 weeks                  | C57BL/6          | wgEncodeEM002500 | GSM1000140 |
| Liver  | 1 | H3K27ac (ab4729)  | U | Embryonic day 14.5             | C57BL/6          | wgEncodeEM002571 | GSM1000113 |
| Liver  | 2 | H3K27ac (ab4729)  | U | Embryonic day 14.5             | C57BL/6          | wgEncodeEM002571 | GSM1000113 |
| Liver  | 1 | H3K27me3 (07-449) | M | Adult 8 weeks                  | C57BL/6          | wgEncodeEM002641 | GSM1000150 |
| Liver  | 2 | H3K27me3 (07-449) | M | Adult 8 weeks                  | C57BL/6          | wgEncodeEM002641 | GSM1000150 |
| Liver  | 1 | H3K36me3 (ab9050) | M | Adult 8 weeks                  | C57BL/6          | wgEncodeEM002642 | GSM1000151 |
| Liver  | 2 | H3K36me3 (ab9050) | M | Adult 8 weeks                  | C57BL/6          | wgEncodeEM002642 | GSM1000151 |
| Liver  | 1 | H3K4me1 (ab8895)  | M | Adult 8 weeks                  | C57BL/6          | wgEncodeEM001443 | GSM769015  |
| Liver  | 2 | H3K4me1 (ab8895)  | M | Adult 8 weeks                  | C57BL/6          | wgEncodeEM001443 | GSM769015  |
| Liver  | 1 | H3K4me1 (ab8895)  | U | Embryonic day 14.5             | C57BL/6          | wgEncodeEM002573 | GSM1000111 |
| Liver  | 2 | H3K4me1 (ab8895)  | U | Embryonic day 14.5             | C57BL/6          | wgEncodeEM002573 | GSM1000111 |
| Liver  | 1 | H3K4me3 (07-473)  | M | Adult 8 weeks                  | C57BL/6          | wgEncodeEM001444 | GSM769014  |
| Liver  | 2 | H3K4me3 (07-473)  | M | Adult 8 weeks                  | C57BL/6          | wgEncodeEM001444 | GSM769014  |
| Liver  | 1 | H3K4me3 (07-473)  | U | Embryonic day 14.5             | C57BL/6          | wgEncodeEM002572 | GSM1000110 |
| Liver  | 2 | H3K4me3 (07-473)  | U | Embryonic day 14.5             | C57BL/6          | wgEncodeEM002572 | GSM1000110 |
| Liver  | 1 | H3K79me2 (39143)  | M | Adult 8 weeks                  | C57BL/6          | wgEncodeEM002643 | GSM1000152 |
| Liver  | 2 | H3K79me2 (39143)  | M | Adult 8 weeks                  | C57BL/6          | wgEncodeEM002643 | GSM1000152 |
| Liver  | 1 | H3K9ac (ab4441)   | M | Adult 8 weeks                  | C57BL/6          | wgEncodeEM002644 | GSM1000153 |
| Liver  | 2 | H3K9ac (ab4441)   | M | Adult 8 weeks                  | C57BL/6          | wgEncodeEM002644 | GSM1000153 |
| Liver  | 1 | Input             | M | Adult 8 weeks                  | C57BL/6          | wgEncodeEM001452 | GSM769034  |
| Liver  | 2 | Input             | M | Adult 8 weeks                  | C57BL/6          | wgEncodeEM001452 | GSM769034  |
| Liver  | 1 | Input             | U | Embryonic day 14.5             | C57BL/6          | wgEncodeEM002570 | GSM1000112 |
| Liver  | 2 | Input             | U | Embryonic day 14.5             | C57BL/6          | wgEncodeEM002570 | GSM1000112 |
| Lung   | 1 | H3K4me1 (ab8895)  | M | Adult 8 weeks                  | C57BL/6          | wgEncodeEM001445 | GSM769013  |
| Lung   | 2 | H3K4me1 (ab8895)  | M | Adult 8 weeks                  | C57BL/6          | wgEncodeEM001445 | GSM769013  |
| Lung   | 1 | H3K4me3 (07-473)  | M | Adult 8 weeks                  | C57BL/6          | wgEncodeEM001446 | GSM769012  |
| Lung   | 2 | H3K4me3 (07-473)  | M | Adult 8 weeks                  | C57BL/6          | wgEncodeEM001446 | GSM769012  |
| Lung   | 1 | Input             | M | Adult 8 weeks                  | C57BL/6          | wgEncodeEM001453 | GSM769035  |
| Lung   | 2 | Input             | M | Adult 8 weeks                  | C57BL/6          | wgEncodeEM001453 | GSM769035  |
| MEF    | 1 | H3K27ac (ab4729)  | M | Adult 8 weeks                  | C57BL/6          | wgEncodeEM002501 | GSM1000139 |
| MEF    | 2 | H3K27ac (ab4729)  | M | Adult 8 weeks                  | C57BL/6          | wgEncodeEM002501 | GSM1000139 |
| MEF    | 1 | H3K4me1 (ab8895)  | M | Adult 8 weeks                  | C57BL/6          | wgEncodeEM001454 | GSM769028  |
| MEF    | 2 | H3K4me1 (ab8895)  | M | Adult 8 weeks                  | C57BL/6          | wgEncodeEM001454 | GSM769028  |
| MEF    | 1 | H3K4me3 (07-473)  | M | Adult 8 weeks                  | C57BL/6          | wgEncodeEM001455 | GSM769029  |
| MEF    | 2 | H3K4me3 (07-473)  | M | Adult 8 weeks                  | C57BL/6          | wgEncodeEM001455 | GSM769029  |
| MEF    | 1 | Input             | M | Adult 8 weeks                  | C57BL/6          | wgEncodeEM001456 | GSM769030  |
| MEF    | 2 | Input             | M | Adult 8 weeks                  | C57BL/6          | wgEncodeEM001456 | GSM769030  |
| MEL    | 1 | H3K27ac (ab4729)  | M | Immortal cells                 | Unknown          | wgEncodeEM002649 | GSM1000142 |
| MEL    | 2 | H3K27ac (ab4729)  | M | Immortal cells                 | Unknown          | wgEncodeEM002649 | GSM1000142 |

|                 |   |                   |   |                    |         |                  |            |
|-----------------|---|-------------------|---|--------------------|---------|------------------|------------|
| MEL             | 1 | H3K27me3 (07-449) | M | Immortal cells     | Unknown | wgEncodeEM002645 | GSM1000154 |
| MEL             | 2 | H3K27me3 (07-449) | M | Immortal cells     | Unknown | wgEncodeEM002645 | GSM1000154 |
| MEL             | 1 | H3K36me3 (ab9050) | M | Immortal cells     | Unknown | wgEncodeEM002646 | GSM1000155 |
| MEL             | 2 | H3K36me3 (ab9050) | M | Immortal cells     | Unknown | wgEncodeEM002646 | GSM1000155 |
| MEL             | 1 | H3K4me1 (ab8895)  | M | Immortal cells     | Unknown | wgEncodeEM002650 | GSM1000073 |
| MEL             | 2 | H3K4me1 (ab8895)  | M | Immortal cells     | Unknown | wgEncodeEM002650 | GSM1000073 |
| MEL             | 1 | H3K4me3 (07-473)  | M | Immortal cells     | Unknown | wgEncodeEM002651 | GSM1000087 |
| MEL             | 2 | H3K4me3 (07-473)  | M | Immortal cells     | Unknown | wgEncodeEM002651 | GSM1000087 |
| MEL             | 1 | H3K79me2 (39143)  | M | Immortal cells     | Unknown | wgEncodeEM002647 | GSM1000156 |
| MEL             | 2 | H3K79me2 (39143)  | M | Immortal cells     | Unknown | wgEncodeEM002647 | GSM1000156 |
| MEL             | 1 | H3K9ac (ab4441)   | M | Immortal cells     | Unknown | wgEncodeEM002648 | GSM1000141 |
| MEL             | 2 | H3K9ac (ab4441)   | M | Immortal cells     | Unknown | wgEncodeEM002648 | GSM1000141 |
| MEL             | 1 | Input             | M | Immortal cells     | Unknown | wgEncodeEM002652 | GSM1000200 |
| MEL             | 2 | Input             | M | Immortal cells     | Unknown | wgEncodeEM002652 | GSM1000200 |
| Olfactory Bulb  | 1 | H3K27ac (ab4729)  | M | Adult 8 weeks      | C57BL/6 | wgEncodeEM002471 | GSM1000105 |
| Olfactory Bulb  | 2 | H3K27ac (ab4729)  | M | Adult 8 weeks      | C57BL/6 | wgEncodeEM002471 | GSM1000105 |
| Olfactory Bulb  | 1 | H3K4me1 (ab8895)  | M | Adult 8 weeks      | C57BL/6 | wgEncodeEM002472 | GSM1000104 |
| Olfactory Bulb  | 2 | H3K4me1 (ab8895)  | M | Adult 8 weeks      | C57BL/6 | wgEncodeEM002472 | GSM1000104 |
| Olfactory Bulb  | 1 | H3K4me3 (07-473)  | M | Adult 8 weeks      | C57BL/6 | wgEncodeEM002511 | GSM1000128 |
| Olfactory Bulb  | 2 | H3K4me3 (07-473)  | M | Adult 8 weeks      | C57BL/6 | wgEncodeEM002511 | GSM1000128 |
| Olfactory Bulb  | 1 | Input             | M | Adult 8 weeks      | C57BL/6 | wgEncodeEM002473 | GSM1000205 |
| Olfactory Bulb  | 2 | Input             | M | Adult 8 weeks      | C57BL/6 | wgEncodeEM002473 | GSM1000205 |
| Placenta        | 1 | H3K27ac (ab4729)  | F | Adult 8 weeks      | C57BL/6 | wgEncodeEM002507 | GSM1000134 |
| Placenta        | 2 | H3K27ac (ab4729)  | F | Adult 8 weeks      | C57BL/6 | wgEncodeEM002507 | GSM1000134 |
| Placenta        | 1 | H3K4me1 (ab8895)  | F | Adult 8 weeks      | C57BL/6 | wgEncodeEM002508 | GSM1000133 |
| Placenta        | 2 | H3K4me1 (ab8895)  | F | Adult 8 weeks      | C57BL/6 | wgEncodeEM002508 | GSM1000133 |
| Placenta        | 1 | H3K4me3 (07-473)  | F | Adult 8 weeks      | C57BL/6 | wgEncodeEM002509 | GSM1000132 |
| Placenta        | 2 | H3K4me3 (07-473)  | F | Adult 8 weeks      | C57BL/6 | wgEncodeEM002509 | GSM1000132 |
| Placenta        | 1 | Input             | F | Adult 8 weeks      | C57BL/6 | wgEncodeEM002510 | GSM1000207 |
| Placenta        | 2 | Input             | F | Adult 8 weeks      | C57BL/6 | wgEncodeEM002510 | GSM1000207 |
| Small Intestine | 1 | H3K27ac (ab4729)  | M | Adult 8 weeks      | C57BL/6 | wgEncodeEM002483 | GSM1000084 |
| Small Intestine | 2 | H3K27ac (ab4729)  | M | Adult 8 weeks      | C57BL/6 | wgEncodeEM002483 | GSM1000084 |
| Small Intestine | 1 | H3K27me3 (07-449) | M | Adult 8 weeks      | C57BL/6 | wgEncodeEM002713 | GSM1000064 |
| Small Intestine | 2 | H3K27me3 (07-449) | M | Adult 8 weeks      | C57BL/6 | wgEncodeEM002713 | GSM1000064 |
| Small Intestine | 1 | H3K36me3 (ab9050) | M | Adult 8 weeks      | C57BL/6 | wgEncodeEM002714 | GSM1000069 |
| Small Intestine | 2 | H3K36me3 (ab9050) | M | Adult 8 weeks      | C57BL/6 | wgEncodeEM002714 | GSM1000069 |
| Small Intestine | 1 | H3K4me1 (ab8895)  | M | Adult 8 weeks      | C57BL/6 | wgEncodeEM002484 | GSM1000082 |
| Small Intestine | 2 | H3K4me1 (ab8895)  | M | Adult 8 weeks      | C57BL/6 | wgEncodeEM002484 | GSM1000082 |
| Small Intestine | 1 | H3K4me3 (07-473)  | M | Adult 8 weeks      | C57BL/6 | wgEncodeEM002485 | GSM1000083 |
| Small Intestine | 2 | H3K4me3 (07-473)  | M | Adult 8 weeks      | C57BL/6 | wgEncodeEM002485 | GSM1000083 |
| Small Intestine | 1 | Input             | M | Adult 8 weeks      | C57BL/6 | wgEncodeEM002486 | GSM1000080 |
| Small Intestine | 2 | Input             | M | Adult 8 weeks      | C57BL/6 | wgEncodeEM002486 | GSM1000080 |
| Spleen          | 1 | H3K27ac (ab4729)  | M | Adult 8 weeks      | C57BL/6 | wgEncodeEM002502 | GSM1000138 |
| Spleen          | 2 | H3K27ac (ab4729)  | M | Adult 8 weeks      | C57BL/6 | wgEncodeEM002502 | GSM1000138 |
| Spleen          | 1 | H3K27me3 (07-449) | M | Adult 8 weeks      | C57BL/6 | wgEncodeEM002722 | GSM1000146 |
| Spleen          | 2 | H3K27me3 (07-449) | M | Adult 8 weeks      | C57BL/6 | wgEncodeEM002722 | GSM1000146 |
| Spleen          | 1 | H3K36me3 (ab9050) | M | Adult 8 weeks      | C57BL/6 | wgEncodeEM002715 | GSM1000070 |
| Spleen          | 2 | H3K36me3 (ab9050) | M | Adult 8 weeks      | C57BL/6 | wgEncodeEM002715 | GSM1000070 |
| Spleen          | 1 | H3K4me1 (ab8895)  | M | Adult 8 weeks      | C57BL/6 | wgEncodeEM001457 | GSM769031  |
| Spleen          | 2 | H3K4me1 (ab8895)  | M | Adult 8 weeks      | C57BL/6 | wgEncodeEM001457 | GSM769031  |
| Spleen          | 1 | H3K4me3 (07-473)  | M | Adult 8 weeks      | C57BL/6 | wgEncodeEM001458 | GSM769036  |
| Spleen          | 2 | H3K4me3 (07-473)  | M | Adult 8 weeks      | C57BL/6 | wgEncodeEM001458 | GSM769036  |
| Spleen          | 1 | Input             | M | Adult 8 weeks      | C57BL/6 | wgEncodeEM001459 | GSM769037  |
| Spleen          | 2 | Input             | M | Adult 8 weeks      | C57BL/6 | wgEncodeEM001459 | GSM769037  |
| Testis          | 1 | H3K27ac (ab4729)  | M | Adult 8 weeks      | C57BL/6 | wgEncodeEM002487 | GSM1000081 |
| Testis          | 2 | H3K27ac (ab4729)  | M | Adult 8 weeks      | C57BL/6 | wgEncodeEM002487 | GSM1000081 |
| Testis          | 1 | H3K27me3 (07-449) | M | Adult 8 weeks      | C57BL/6 | wgEncodeEM002723 | GSM1000145 |
| Testis          | 2 | H3K27me3 (07-449) | M | Adult 8 weeks      | C57BL/6 | wgEncodeEM002723 | GSM1000145 |
| Testis          | 1 | H3K36me3 (ab9050) | M | Adult 8 weeks      | C57BL/6 | wgEncodeEM002716 | GSM1000067 |
| Testis          | 2 | H3K36me3 (ab9050) | M | Adult 8 weeks      | C57BL/6 | wgEncodeEM002716 | GSM1000067 |
| Testis          | 1 | H3K4me1 (ab8895)  | M | Adult 8 weeks      | C57BL/6 | wgEncodeEM002488 | GSM1000078 |
| Testis          | 2 | H3K4me1 (ab8895)  | M | Adult 8 weeks      | C57BL/6 | wgEncodeEM002488 | GSM1000078 |
| Testis          | 1 | H3K4me3 (07-473)  | M | Adult 8 weeks      | C57BL/6 | wgEncodeEM002489 | GSM1000079 |
| Testis          | 2 | H3K4me3 (07-473)  | M | Adult 8 weeks      | C57BL/6 | wgEncodeEM002489 | GSM1000079 |
| Testis          | 1 | Input             | M | Adult 8 weeks      | C57BL/6 | wgEncodeEM002490 | GSM1000203 |
| Testis          | 2 | Input             | M | Adult 8 weeks      | C57BL/6 | wgEncodeEM002490 | GSM1000203 |
| Thymus          | 1 | H3K27ac (ab4729)  | M | Adult 8 weeks      | C57BL/6 | wgEncodeEM002474 | GSM1000103 |
| Thymus          | 2 | H3K27ac (ab4729)  | M | Adult 8 weeks      | C57BL/6 | wgEncodeEM002474 | GSM1000103 |
| Thymus          | 1 | H3K27me3 (07-449) | M | Adult 8 weeks      | C57BL/6 | wgEncodeEM002724 | GSM1000144 |
| Thymus          | 2 | H3K27me3 (07-449) | M | Adult 8 weeks      | C57BL/6 | wgEncodeEM002724 | GSM1000144 |
| Thymus          | 1 | H3K36me3 (ab9050) | M | Adult 8 weeks      | C57BL/6 | wgEncodeEM002717 | GSM1000068 |
| Thymus          | 2 | H3K36me3 (ab9050) | M | Adult 8 weeks      | C57BL/6 | wgEncodeEM002717 | GSM1000068 |
| Thymus          | 1 | H3K4me1 (ab8895)  | M | Adult 8 weeks      | C57BL/6 | wgEncodeEM002475 | GSM1000102 |
| Thymus          | 2 | H3K4me1 (ab8895)  | M | Adult 8 weeks      | C57BL/6 | wgEncodeEM002475 | GSM1000102 |
| Thymus          | 1 | H3K4me3 (07-473)  | M | Adult 8 weeks      | C57BL/6 | wgEncodeEM002476 | GSM1000101 |
| Thymus          | 2 | H3K4me3 (07-473)  | M | Adult 8 weeks      | C57BL/6 | wgEncodeEM002476 | GSM1000101 |
| Thymus          | 1 | Input             | M | Adult 8 weeks      | C57BL/6 | wgEncodeEM002477 | GSM1000204 |
| Thymus          | 2 | Input             | M | Adult 8 weeks      | C57BL/6 | wgEncodeEM002477 | GSM1000204 |
| Whole Brain     | 1 | H3K27ac (ab4729)  | U | Embryonic day 14.5 | C57BL/6 | wgEncodeEM002491 | GSM1000094 |
| Whole Brain     | 2 | H3K27ac (ab4729)  | U | Embryonic day 14.5 | C57BL/6 | wgEncodeEM002491 | GSM1000094 |
| Whole Brain     | 1 | H3K27me3 (07-449) | M | Embryonic day 14.5 | C57BL/6 | wgEncodeEM002725 | GSM1000143 |
| Whole Brain     | 2 | H3K27me3 (07-449) | M | Embryonic day 14.5 | C57BL/6 | wgEncodeEM002725 | GSM1000143 |
| Whole Brain     | 1 | H3K36me3 (ab9050) | M | Embryonic day 14.5 | C57BL/6 | wgEncodeEM002718 | GSM1000072 |
| Whole Brain     | 2 | H3K36me3 (ab9050) | M | Embryonic day 14.5 | C57BL/6 | wgEncodeEM002718 | GSM1000072 |
| Whole Brain     | 1 | H3K4me1 (ab8895)  | U | Embryonic day 14.5 | C57BL/6 | wgEncodeEM002492 | GSM1000096 |
| Whole Brain     | 2 | H3K4me1 (ab8895)  | U | Embryonic day 14.5 | C57BL/6 | wgEncodeEM002492 | GSM1000096 |
| Whole Brain     | 1 | H3K4me3 (07-473)  | U | Embryonic day 14.5 | C57BL/6 | wgEncodeEM002493 | GSM1000095 |
| Whole Brain     | 2 | H3K4me3 (07-473)  | U | Embryonic day 14.5 | C57BL/6 | wgEncodeEM002493 | GSM1000095 |
| Whole Brain     | 1 | H3K9me3 (ab8898)  | M | Embryonic day 14.5 | C57BL/6 | wgEncodeEM002726 | GSM1000106 |



|                        |               |                   |                   |                                 |                    |                  |                  |            |
|------------------------|---------------|-------------------|-------------------|---------------------------------|--------------------|------------------|------------------|------------|
| Histone, PSU           | Whole Brain   | 2                 | H3K9me3 (ab8898)  | M                               | Embryonic day 14.5 | C57BL/6          | wgEncodeEM002726 | GSM1000106 |
|                        | Whole Brain   | 2                 | Input             | U                               | Embryonic day 14.5 | C57BL/6          | wgEncodeEM002494 | GSM1000098 |
|                        | Whole Brain   | 2                 | Input             | U                               | Embryonic day 14.5 | C57BL/6          | wgEncodeEM002494 | GSM1000098 |
|                        | CH12          | 2                 | Input             |                                 |                    |                  | wgEncodeEM001923 | GSM946521  |
|                        | CH12          | 1                 | Input             |                                 |                    |                  | wgEncodeEM001923 | GSM946521  |
|                        | CH12          | 2                 | H3K36me3 (ab9050) |                                 |                    |                  | wgEncodeEM002364 | GSM946530  |
|                        | CH12          | 1                 | H3K36me3 (ab9050) |                                 |                    |                  | wgEncodeEM002364 | GSM946530  |
|                        | CH12          | 2                 | H3K27me3 (07-449) |                                 |                    |                  | wgEncodeEM002362 | GSM946532  |
|                        | CH12          | 1                 | H3K27me3 (07-449) |                                 |                    |                  | wgEncodeEM002362 | GSM946532  |
|                        | CH12          | 2                 | H3K9me3 (ab8898)  |                                 |                    |                  | wgEncodeEM002372 | GSM946548  |
|                        | CH12          | 1                 | H3K9me3 (ab8898)  |                                 |                    |                  | wgEncodeEM002372 | GSM946548  |
|                        | CH12          | 2                 | H3K4me3 (07-473)  |                                 |                    |                  | wgEncodeEM002366 | GSM946528  |
|                        | CH12          | 1                 | H3K4me3 (07-473)  |                                 |                    |                  | wgEncodeEM002366 | GSM946528  |
|                        | CH12          | 2                 | H3K4me1 (ab8895)  |                                 |                    |                  | wgEncodeEM002370 | GSM946546  |
|                        | CH12          | 1                 | H3K4me1 (ab8895)  |                                 |                    |                  | wgEncodeEM002370 | GSM946546  |
|                        | Erythroblast  | 2                 | Input             |                                 |                    |                  | wgEncodeEM002350 | GSM946544  |
|                        | Erythroblast  | 1                 | Input             |                                 |                    |                  | wgEncodeEM002350 | GSM946544  |
|                        | Erythroblast  | 2                 | H3K36me3 (ab9050) |                                 |                    |                  | wgEncodeEM002375 | GSM946543  |
|                        | Erythroblast  | 1                 | H3K36me3 (ab9050) |                                 |                    |                  | wgEncodeEM002375 | GSM946543  |
|                        | Erythroblast  | 2                 | H3K27me3 (07-449) |                                 |                    |                  | wgEncodeEM002371 | GSM946547  |
|                        | Erythroblast  | 1                 | H3K27me3 (07-449) |                                 |                    |                  | wgEncodeEM002371 | GSM946547  |
|                        | Erythroblast  | 2                 | H3K9me3 (ab8898)  |                                 |                    |                  | wgEncodeEM002373 | GSM946549  |
|                        | Erythroblast  | 1                 | H3K9me3 (ab8898)  |                                 |                    |                  | wgEncodeEM002373 | GSM946549  |
|                        | Erythroblast  | 2                 | H3K4me3 (07-473)  |                                 |                    |                  | wgEncodeEM002380 | GSM946524  |
|                        | Erythroblast  | 1                 | H3K4me3 (07-473)  |                                 |                    |                  | wgEncodeEM002380 | GSM946524  |
|                        | Erythroblast  | 2                 | H3K4me1 (ab8895)  |                                 |                    |                  | wgEncodeEM002376 | GSM946536  |
|                        | Erythroblast  | 1                 | H3K4me1 (ab8895)  |                                 |                    |                  | wgEncodeEM002376 | GSM946536  |
|                        | G1E           | 2                 | Input             |                                 |                    |                  | wgEncodeEM001916 | GSM946538  |
|                        | G1E           | 1                 | Input             |                                 |                    |                  | wgEncodeEM001916 | GSM946538  |
|                        | G1E           | 2                 | H3K36me3 (ab9050) |                                 |                    |                  | wgEncodeEM002365 | GSM946529  |
|                        | G1E           | 1                 | H3K36me3 (ab9050) |                                 |                    |                  | wgEncodeEM002365 | GSM946529  |
|                        | G1E           | 2                 | H3K27me3 (07-449) |                                 |                    |                  | wgEncodeEM002363 | GSM946531  |
|                        | G1E           | 1                 | H3K27me3 (07-449) |                                 |                    |                  | wgEncodeEM002363 | GSM946531  |
|                        | G1E           | 2                 | H3K9me3 (ab8898)  |                                 |                    |                  | wgEncodeEM002374 | GSM946542  |
|                        | G1E           | 1                 | H3K9me3 (ab8898)  |                                 |                    |                  | wgEncodeEM002374 | GSM946542  |
|                        | G1E           | 2                 | H3K4me3 (07-473)  |                                 |                    |                  | wgEncodeEM001919 | GSM946533  |
|                        | G1E           | 1                 | H3K4me3 (07-473)  |                                 |                    |                  | wgEncodeEM001919 | GSM946533  |
|                        | G1E           | 2                 | H3K4me1 (ab8895)  |                                 |                    |                  | wgEncodeEM001915 | GSM946535  |
|                        | G1E           | 1                 | H3K4me1 (ab8895)  |                                 |                    |                  | wgEncodeEM001915 | GSM946535  |
|                        | G1E-ER4       | 1                 | H3K27me3 (07-449) | Estradiol 24 hour diff protocol |                    |                  | wgEncodeEM001917 | GSM946537  |
|                        | G1E-ER4       | 2                 | H3K27me3 (07-449) | Estradiol 24 hour diff protocol |                    |                  | wgEncodeEM001917 | GSM946537  |
|                        | G1E-ER4       | 1                 | H3K36me3 (ab9050) | Estradiol 24 hour diff protocol |                    |                  | wgEncodeEM002368 | GSM946526  |
|                        | G1E-ER4       | 2                 | H3K36me3 (ab9050) | Estradiol 24 hour diff protocol |                    |                  | wgEncodeEM002368 | GSM946526  |
|                        | G1E-ER4       | 1                 | H3K4me1 (ab8895)  | Estradiol 24 hour diff protocol |                    |                  | wgEncodeEM001918 | GSM946534  |
|                        | G1E-ER4       | 2                 | H3K4me1 (ab8895)  | Estradiol 24 hour diff protocol |                    |                  | wgEncodeEM001918 | GSM946534  |
|                        | G1E-ER4       | 1                 | H3K4me3 (07-473)  | Estradiol 24 hour diff protocol |                    |                  | wgEncodeEM001920 | GSM946519  |
|                        | G1E-ER4       | 2                 | H3K4me3 (07-473)  | Estradiol 24 hour diff protocol |                    |                  | wgEncodeEM001920 | GSM946519  |
|                        | G1E-ER4       | 1                 | H3K9me3 (ab8898)  | Estradiol 24 hour diff protocol |                    |                  | wgEncodeEM002377 | GSM946545  |
|                        | G1E-ER4       | 2                 | H3K9me3 (ab8898)  | Estradiol 24 hour diff protocol |                    |                  | wgEncodeEM002377 | GSM946545  |
|                        | G1E-ER4       | 1                 | Input             | Estradiol 24 hour diff protocol |                    |                  | wgEncodeEM001921 | GSM946520  |
|                        | G1E-ER4       | 2                 | Input             | Estradiol 24 hour diff protocol |                    |                  | wgEncodeEM001921 | GSM946520  |
|                        | Megakaryocyte | 2                 | Input             |                                 |                    |                  | wgEncodeEM002352 | GSM946539  |
|                        | Megakaryocyte | 1                 | Input             |                                 |                    |                  | wgEncodeEM002352 | GSM946539  |
|                        | Megakaryocyte | 2                 | H3K36me3 (ab9050) |                                 |                    |                  | wgEncodeEM002378 | GSM946540  |
| Megakaryocyte          | 1             | H3K36me3 (ab9050) |                   |                                 |                    | wgEncodeEM002378 | GSM946540        |            |
| Megakaryocyte          | 2             | H3K27me3 (07-449) |                   |                                 |                    | wgEncodeEM002381 | GSM946523        |            |
| Megakaryocyte          | 1             | H3K27me3 (07-449) |                   |                                 |                    | wgEncodeEM002381 | GSM946523        |            |
| Megakaryocyte          | 2             | H3K9me3 (ab8898)  |                   |                                 |                    | wgEncodeEM002379 | GSM946541        |            |
| Megakaryocyte          | 1             | H3K9me3 (ab8898)  |                   |                                 |                    | wgEncodeEM002379 | GSM946541        |            |
| Megakaryocyte          | 2             | H3K4me3 (07-473)  |                   |                                 |                    | wgEncodeEM002367 | GSM946527        |            |
| Megakaryocyte          | 1             | H3K4me3 (07-473)  |                   |                                 |                    | wgEncodeEM002367 | GSM946527        |            |
| Megakaryocyte          | 2             | H3K4me1 (ab8895)  |                   |                                 |                    | wgEncodeEM002369 | GSM946525        |            |
| Megakaryocyte          | 1             | H3K4me1 (ab8895)  |                   |                                 |                    | wgEncodeEM002369 | GSM946525        |            |
| Histone, Yale/Stanford | CH12          | 1                 | H3K4me3 (07-473)  | IgG-Yale                        | None               | wgEncodeEM002004 | GSM798327        |            |
|                        | CH12          | 2                 | H3K4me3 (07-473)  | IgG-Yale                        | None               | wgEncodeEM002004 | GSM798327        |            |
|                        | CH12          |                   | Input             | IgG-Yale                        | None               | wgEncodeEM002001 | GSM798326        |            |
|                        | ES-E14        | 1                 | H3K4me1 (ab8895)  | Standard Control                | None               | wgEncodeEM003322 | GSM1003750       |            |
|                        | ES-E14        | 2                 | H3K4me1 (ab8895)  | Standard Control                | None               | wgEncodeEM003322 | GSM1003750       |            |
|                        | ES-E14        | 1                 | H3K4me3 (07-473)  | Standard Control                | None               | wgEncodeEM003328 | GSM1003756       |            |
|                        | ES-E14        | 2                 | H3K4me3 (07-473)  | Standard Control                | None               | wgEncodeEM003328 | GSM1003756       |            |
|                        | ES-E14        | 1                 | H3K9me3 (ab8898)  | Standard Control                | None               | wgEncodeEM003323 | GSM1003751       |            |
|                        | ES-E14        | 2                 | H3K9me3 (ab8898)  | Standard Control                | None               | wgEncodeEM003323 | GSM1003751       |            |
|                        | ES-E14        | 1                 | Input             | Standard Control                | None               | wgEncodeEM002788 | GSM1003746       |            |
|                        | MEL           | 1                 | H3K27ac (ab4729)  | IgG-rab                         | None               | wgEncodeEM003324 | GSM1003752       |            |
|                        | MEL           | 2                 | H3K27ac (ab4729)  | IgG-rab                         | None               | wgEncodeEM003324 | GSM1003752       |            |
|                        | MEL           | 1                 | H3K27me3 (97335)  | Standard Control                | DMSO_2.0pct        | wgEncodeEM003331 | GSM1003745       |            |
|                        | MEL           | 2                 | H3K27me3 (97335)  | Standard Control                | DMSO_2.0pct        | wgEncodeEM003331 | GSM1003745       |            |
|                        | MEL           | 1                 | H3K36me3 (97635)  | Standard Control                | DMSO_2.0pct        | wgEncodeEM003332 | GSM1003749       |            |
|                        | MEL           | 2                 | H3K36me3 (97635)  | Standard Control                | DMSO_2.0pct        | wgEncodeEM003332 | GSM1003749       |            |
|                        | MEL           | 1                 | H3K4me1 (ab8895)  | IgG-rab                         | None               | wgEncodeEM003330 | GSM1003744       |            |
|                        | MEL           | 2                 | H3K4me1 (ab8895)  | IgG-rab                         | None               | wgEncodeEM003330 | GSM1003744       |            |
|                        | MEL           | 1                 | H3K4me1 (ab8895)  | Standard Control                | DMSO_2.0pct        | wgEncodeEM003329 | GSM1003757       |            |
|                        | MEL           | 2                 | H3K4me1 (ab8895)  | Standard Control                | DMSO_2.0pct        | wgEncodeEM003329 | GSM1003757       |            |
|                        | MEL           | 1                 | H3K4me3 (07-473)  | IgG-Yale                        | DMSO_2.0pct        | wgEncodeEM002005 | GSM798328        |            |
|                        | MEL           | 2                 | H3K4me3 (07-473)  | IgG-Yale                        | DMSO_2.0pct        | wgEncodeEM002005 | GSM798328        |            |
|                        | MEL           | 1                 | H3K4me3 (07-473)  | IgG-Yale                        | None               | wgEncodeEM002002 | GSM798324        |            |
|                        | MEL           | 2                 | H3K4me3 (07-473)  | IgG-Yale                        | None               | wgEncodeEM002002 | GSM798324        |            |
|                        | MEL           | 1                 | H3K4me3 (07-473)  | IgG-rab                         | None               | wgEncodeEM003325 | GSM1003753       |            |
|                        | MEL           | 2                 | H3K4me3 (07-473)  | IgG-rab                         | None               | wgEncodeEM003325 | GSM1003753       |            |

Replication Timing

|                   |   |                  |                  |             |           |                  |            |
|-------------------|---|------------------|------------------|-------------|-----------|------------------|------------|
| MEL               | 1 | H3K4me3 (07-473) | Standard Control | DMSO_2.0pct |           | wgEncodeEM003326 | GSM1003754 |
| MEL               | 2 | H3K4me3 (07-473) | Standard Control | DMSO_2.0pct |           | wgEncodeEM003326 | GSM1003754 |
| MEL               | 1 | H3K9me3 (ab8898) | IgG-rab          | None        |           | wgEncodeEM003327 | GSM1003755 |
| MEL               | 2 | H3K9me3 (ab8898) | IgG-rab          | None        |           | wgEncodeEM003327 | GSM1003755 |
| MEL               | 1 | H3K9me3 (ab8898) | Standard Control | DMSO_2.0pct |           | wgEncodeEM003333 | GSM1003748 |
| MEL               | 2 | H3K9me3 (ab8898) | Standard Control | DMSO_2.0pct |           | wgEncodeEM003333 | GSM1003748 |
| MEL               | 1 | Input            | IgG-Yale         | DMSO_2.0pct |           | wgEncodeEM001963 | GSM798323  |
| MEL               |   | Input            | IgG-Yale         | None        |           | wgEncodeEM002003 | GSM798325  |
| MEL               | 1 | Input            | IgG-rab          | None        |           | wgEncodeEM001947 | GSM1003747 |
| MEL               | 1 | Input            | Standard Control | DMSO_2.0pct |           | wgEncodeEM002791 | GSM1003758 |
| CH12              | 1 | F                | None             | GPL10989    | CH12_R1   | wgEncodeEM002962 | GSM1113245 |
| CH12              | 2 | F                | None             | GPL10989    | CH12_R2   | wgEncodeEM002962 | GSM1113246 |
| ES-46C            | 1 | M                | None             | GPL9156     | ES-46C_R1 | wgEncodeEM002964 | GSM450272  |
| ES-46C            | 1 | M                | diffProtF_6d     | GPL9156     | NP-46C_R1 | wgEncodeEM002963 | GSM450283  |
| ES-D3             | 1 | M                | None             | GPL9156     | ES-D3_R1  | wgEncodeEM002968 | GSM450273  |
| ES-D3             | 2 | M                | None             | GPL9156     | ES-D3_R2  | wgEncodeEM002968 | GSM450273  |
| ES-D3             | 1 | M                | diffProtE_3d     | GPL9156     | EBM3_R1   | wgEncodeEM002965 | GSM450279  |
| ES-D3             | 2 | M                | diffProtE_3d     | GPL9156     | EBM3_R2   | wgEncodeEM002965 | GSM450279  |
| ES-D3             | 1 | M                | diffProtE_6d     | GPL9156     | EBM6_R1   | wgEncodeEM002966 | GSM450282  |
| ES-D3             | 2 | M                | diffProtE_6d     | GPL9156     | EBM6_R2   | wgEncodeEM002966 | GSM450282  |
| ES-D3             | 1 | M                | diffProtE_9d     | GPL9156     | NP-D3_R1  | wgEncodeEM002967 | GSM450285  |
| ES-D3             | 2 | M                | diffProtE_9d     | GPL9156     | NP-D3_R2  | wgEncodeEM002967 | GSM450285  |
| ES-D3             | 1 | M                | diffProtG_3d     | GPL9156     |           | wgEncodeEM002976 | GSM450278  |
| ES-D3             | 2 | M                | diffProtG_3d     | GPL9156     |           | wgEncodeEM002976 | GSM450278  |
| ES-EM5Sox17huCD25 | 1 | U                | diffProtH_Sox17+ | GPL9156     |           | wgEncodeEM002978 | GSM450287  |
| ES-EM5Sox17huCD25 | 2 | U                | diffProtH_Sox17+ | GPL9156     |           | wgEncodeEM002978 | GSM450287  |
| ES-EM5Sox17huCD25 | 1 | U                | diffProtH_Sox17- | GPL9156     |           | wgEncodeEM002977 | GSM450286  |
| ES-EM5Sox17huCD25 | 2 | U                | diffProtH_Sox17- | GPL9156     |           | wgEncodeEM002977 | GSM450286  |
| ES-TT2            | 1 | M                | None             | GPL9156     | ES-TT2_R1 | wgEncodeEM002970 | GSM450274  |
| ES-TT2            | 2 | M                | None             | GPL9156     | ES-TT2_R2 | wgEncodeEM002970 | GSM450274  |
| ES-TT2            | 1 | M                | diffProtF_9d     | GPL9156     | NP-TT2_R1 | wgEncodeEM002969 | GSM450284  |
| ES-TT2            | 2 | M                | diffProtF_9d     | GPL9156     | NP-TT2_R2 | wgEncodeEM002969 | GSM450284  |
| EpiSC-5           | 1 | M                | None             | GPL9156     | EpiSC5_R1 | wgEncodeEM002971 | GSM450280  |
| EpiSC-5           | 2 | M                | None             | GPL9156     | EpiSC5_R2 | wgEncodeEM002971 | GSM450280  |
| EpiSC-7           | 1 | F                | None             | GPL9156     | EpiSC7_R1 | wgEncodeEM002972 | GSM450281  |
| EpiSC-7           | 2 | F                | None             | GPL9156     | EpiSC7_R2 | wgEncodeEM002972 | GSM450281  |
| J185a             | 1 | U                | None             | GPL9156     |           | wgEncodeEM002979 | GSM450293  |
| J185a             | 2 | U                | None             | GPL9156     |           | wgEncodeEM002979 | GSM450293  |
| L1210             | 1 | F                | None             | GPL9156     | L1210_R1  | wgEncodeEM002973 | GSM1112425 |
| L1210             | 2 | F                | None             | GPL9156     | L1210_R2  | wgEncodeEM002973 | GSM1112426 |
| MEF               | 1 | M                | None             | GPL9156     | MEF_R1    | wgEncodeEM002974 | GSM450292  |
| MEL               | 1 | M                | None             | GPL10989    | MEL_R1    | wgEncodeEM002975 | GSM1113247 |
| MEL               | 2 | M                | None             | GPL10989    | MEL_R2    | wgEncodeEM002975 | GSM1113248 |

Supplementary Table 9: List of 76 predicted promoters tested by reporter assay.

|                               |                        |                               | Forward                 | Reverse                  | tested positive mESCs in one direction | tested positive in mESCs in both directions | tested negative in mESCs | tested positive in MEF in one direction | tested positive in MEF in both directions | tested negative in MEF |
|-------------------------------|------------------------|-------------------------------|-------------------------|--------------------------|----------------------------------------|---------------------------------------------|--------------------------|-----------------------------------------|-------------------------------------------|------------------------|
| mESC and MEF                  | me3+polII              | chr1:72,282,608-72,283,862    | 1 CCCCATGGCTACTAGCAAGA  | TCAACAAGACCCCGGGTAACT    | 1                                      |                                             |                          | 1                                       |                                           |                        |
|                               |                        | chr11:120,176,972-120,178,515 | 2 GCTCTGCGCATATAAACAAT  | CTGTCTAATGCGGCTTAAAC     |                                        | 1                                           |                          | 1                                       |                                           |                        |
|                               |                        | chr1:88,383,424-88,384,740    | 3 CCACGTAGCCATCTTCTCC   | ACGACGGCTTTTGTGTACC      | 1                                      |                                             |                          | 1                                       |                                           |                        |
|                               |                        | chr2:32,821,808-32,823,140    | 4 TAGCACATCCCTGTCCCTC   | CCCTGAAGCACTTGTCTACC     |                                        | 1                                           |                          |                                         | 1                                         |                        |
|                               |                        | chr8:46,019,901-46,021,052    | 5 GCATTTGGAAAGGATTTGGA  | TGAAACACCCCACTGTTT       | 1                                      |                                             |                          |                                         | 1                                         |                        |
|                               |                        | chr16:94,534,005-94,535,452   | 6 AAACCCCTCTCCCGATGAC   | GAGCTGGGATCCAGATTG       | 1                                      |                                             |                          |                                         | 1                                         |                        |
|                               |                        | chr4:133,466,066-133,467,413  | 7 AGTTTTGGATGCTTGTTCG   | GGCGGTGTCTGGAGAGTAGA     | 1                                      |                                             |                          |                                         | 1                                         |                        |
|                               |                        | chr10:81,640,535-81,641,906   | 8 TTCTGCTAAGTTCTGAAGTTT | TGCGGGAGTTAACTGTAGA      | 1                                      |                                             |                          |                                         | 1                                         |                        |
|                               |                        | chr12:113,931,008-113,932,428 | 9 AGCTTCCACCTTTCGACTGT  | ASCTGTCTCAACATCATGG      |                                        |                                             |                          |                                         |                                           | 1                      |
|                               |                        | chr16:21,332,693-21,334,078   | 11 GCTGCTGAACAGAACTTCC  | AAGAACTGTTCGCCACTGT      |                                        | 1                                           |                          |                                         | 1                                         |                        |
|                               |                        | chr6:117,829,050-117,830,421  | 12 GTACCGTTGGTCCCTACAC  | GGGTGCTTGGATTTTCTGT      |                                        | 1                                           |                          |                                         | 1                                         |                        |
|                               |                        | chr7:88,667,757-88,668,832    | 13 CAAGTCAAAGCACACAGGGA | CAACAGCTGTGTGCATGTGA     |                                        |                                             | 1                        |                                         | 1                                         |                        |
|                               |                        | me3 ONLY                      | me3 ONLY                | chr1:4,561,098-4,562,521 | 1 CAAGTCCAGACCAAGTTTGA                 | TTGATCCATTTTCCACAG                          |                          |                                         | 1                                         |                        |
| chr13:23,487,516-23,488,786   | 2 GGTGATGTTTCTGGGTTA   |                               |                         | CAGATCCCGCTCTACTACT      |                                        |                                             | 1                        |                                         |                                           | 1                      |
| chr1:172,963,082-172,964,359  | 9 GGACTTCAGATCCCAAG    |                               |                         | GAGATCTGATCGCTGTGAC      |                                        |                                             | 1                        |                                         |                                           | 1                      |
| chr18:24,625,130-24,626,521   | 4 CCTGGGCTCGTGTGCTA    |                               |                         | GAGAAGCAACCAGAGCAAC      |                                        |                                             | 1                        |                                         |                                           | 1                      |
| chr19:61,275,284-61,276,321   | 5 ACCCAACACGACCACTCT   |                               |                         | CTCTTGACACCTGTTTT        | 1                                      |                                             |                          |                                         |                                           | 1                      |
| chr13:21,366,741-21,367,942   | 6 GCTGCTGTTGGATGAGCC   |                               |                         | CCACAGCAAAAATGCTCCA      | 1                                      |                                             |                          |                                         |                                           | 1                      |
| chr11:37,049,105-37,050,498   | 7 GTAGCTCCGCTCCCTGACAC |                               |                         | ATCGGGTTAGCAGAGCAGA      | 1                                      |                                             |                          |                                         |                                           | 1                      |
| chr14:51,702,299-51,703,553   | 8 AGAGGCGGTGCTCAGAAAA  |                               |                         | CTGCTGTTTGTGGAGATT       |                                        |                                             | 1                        |                                         |                                           | 1                      |
| chr8:70,513,577-88,514,670    | 9 GGACTTCAGATCCCAAG    |                               |                         | GAGATCTGATCGCTGTGAC      |                                        |                                             | 1                        |                                         |                                           | 1                      |
| chr8:52,000,477-52,001,938    | 10 GCTACTGCTCTTCCAACC  |                               |                         | CACCTAGTGGGAGGAGGG       |                                        |                                             | 1                        |                                         | 1                                         |                        |
| chr13:21,947,190-21,948,224   | 11 CAGCGTGGCTTCTTACT   |                               |                         | TCTCATGATGCCAAACCAA      |                                        |                                             | 1                        |                                         |                                           | 1                      |
| chr19:38,555,283-38,556,504   | 12 CCCTCTGGATCTGAGACAA |                               |                         | ACCAAGTGTGCCAAGGCTA      | 1                                      |                                             |                          | 1                                       |                                           |                        |
| chr6:70,962,454-70,963,748    | 13 GGAGGGAGGATGAAGTAGG |                               |                         | AGCTGGAGGAGCTTTTAG       |                                        |                                             | 1                        |                                         |                                           | 1                      |
| mESC only                     | polII+me3              | chr2:75,471,401-75,472,561    | 1 CATTCACTTGGTGGGCTCT   | TCATTGGGCTAATGCAAAG      |                                        |                                             | 1                        |                                         |                                           | 1                      |
|                               |                        | chr12:18,393,657-18,394,810   | 2 AGTCGAAGGTCATGGGTTTG  | AAACACCAGCTCACTCT        | 1                                      |                                             |                          |                                         |                                           |                        |
|                               |                        | chr15:100,922,977-100,924,412 | 3 CTGAAACCCACCTCCATC    | TGAACTGAAGAACCCCAAG      |                                        | 1                                           |                          |                                         |                                           |                        |
|                               |                        | chr2:166,903,330-166,904,794  | 4 CACTCCGGAAGGTTAGAAAG  | CTGGCTTAGAGAGTTCAAG      |                                        | 1                                           |                          |                                         |                                           |                        |
|                               |                        | chr2:168,805,839-168,807,165  | 5 CTGGGCTATGAACGAATA    | TGACCATCTGCACCCATA       |                                        |                                             | 1                        |                                         |                                           |                        |
|                               |                        | chr4:138,262,409-138,263,533  | 6 CTCAGGCGTCTAAGAATG    | TAGCACTGTGCTTGTCTCT      | 1                                      |                                             |                          |                                         |                                           |                        |
|                               |                        | chr17:30,118,145-30,119,424   | 7 AGCTCAGACCAACCGTTCT   | GCTAGCTGGCTTATGATTC      | 1                                      |                                             |                          |                                         |                                           |                        |
|                               |                        | chr8:109,632,424-109,633,774  | 8 AATCTGACCGCAATAGCTG   | GTTGACTCTGGCGGAGCTG      | 1                                      |                                             |                          |                                         |                                           |                        |
|                               |                        | chr4:154,028,643-154,030,048  | 9 GCTGGACTCTGAGAACTGG   | TGAGTGCAGAGAGGTCATGG     |                                        | 1                                           |                          |                                         |                                           |                        |
|                               |                        | chr8:70,513,577-88,514,670    | 10 GCTGTCATCTGTTTTGG    | GGACACTGATCGCTGTGAC      | 1                                      |                                             |                          |                                         |                                           |                        |
|                               |                        | chr9:114,572,308-114,573,743  | 11 TGGCGAGGACTTATCAACC  | AGAGGGCCACAGCTAAAT       |                                        |                                             | 1                        |                                         |                                           |                        |
|                               |                        | chr7:50,508,728-50,509,835    | 12 CTGCAAGTTGAATCCTCAGC | AAAAGTTGGATGGGAGGTC      |                                        |                                             | 1                        |                                         |                                           |                        |
|                               |                        | chr5:110,514,708-110,515,903  | 13 CCCTGGTTGGCATTACTT   | CTGGGCAACCTTCTCTTAT      | 1                                      |                                             |                          |                                         |                                           |                        |
| me3 only                      | me3 only               | chr8:91,576,369-91,577,522    | 1 GCTACGCCATAGATCAATTT  | AAATGCTCGGAGCTGAAAGA     |                                        |                                             |                          |                                         |                                           | 1                      |
|                               |                        | chr14:76,915,379-76,916,761   | 2 AACAGGAGCAGCATGGAGAT  | ACAATGGAGCAGAGGTTGCC     |                                        | 1                                           |                          |                                         |                                           |                        |
|                               |                        | chr4:133,512,988-133,514,350  | 3 TGGGCAATAAGAGCTGGAAAT | TGTTTGGTTGGTTTGG         |                                        |                                             | 1                        |                                         |                                           |                        |
|                               |                        | chr9:113,954,352-113,955,827  | 4 CCCAGGTATGAAATATCC    | CAGCACTGGCATACTGGAC      |                                        |                                             | 1                        |                                         |                                           |                        |
|                               |                        | chr2:167,088,587-167,089,586  | 5 CATCTCTCTGCCTTGAACA   | TCTCATTCCGCTTTAAACCA     | 1                                      |                                             |                          |                                         |                                           |                        |
|                               |                        | chr19:55,803,480-55,804,780   | 6 TATGACCGAAGCACAACA    | AATGTTCTGATGGCGAAG       | 1                                      |                                             |                          |                                         |                                           |                        |
|                               |                        | chr5:33,876,910-33,878,336    | 7 CAGGACAGGGTTAAGAGCA   | ACTCGGTTTGAAGTGAGTT      |                                        |                                             | 1                        |                                         |                                           |                        |
|                               |                        | chr8:28,332,972-28,334,480    | 8 AGGAGGCGCTAACACTTCT   | CGTCATTCTCAAACTGTCT      | 1                                      |                                             |                          |                                         |                                           |                        |
|                               |                        | chr4:140,840,789-140,842,238  | 9 GCAGATCTGACTGGGGTTA   | GGGCTATTGGAGGTTTAGG      | 1                                      |                                             |                          |                                         |                                           |                        |
|                               |                        | chr4:44,965,616-44,967,013    | 10 TGAATCTGGAGGGTACAG   | GAGGCAATGAAAGCATCTGG     |                                        |                                             | 1                        |                                         |                                           |                        |
|                               |                        | chr17:37,107,047-37,108,640   | 11 CTCGAAGTGCCTCAGTAGCC | TCCTCCAGACTTCCACAC       |                                        |                                             | 1                        |                                         |                                           |                        |
|                               |                        | chr3:96,373,157-96,374,474    | 12 GAGCCCTCACTCCAGTCTA  | ATATCTAGGCGGCCGTGTC      |                                        |                                             | 1                        |                                         |                                           |                        |
|                               |                        | chr17:29,655,802-29,657,008   | 13 GGCTGCATATACTCAACCTC | GGTTCAGGCACTCAGTTG       | 1                                      |                                             |                          |                                         |                                           |                        |
| MEF only                      | polII+me3              | chr7:106,503,912-106,505,303  | 1 TCCATTTGCGACTGGTAG    | TCCAGTTCTGCGTCTTCTT      |                                        |                                             |                          | 1                                       |                                           |                        |
|                               |                        | chr12:70,602,990-70,604,165   | 2 CGTTAGAGCCAGAAGCAGT   | CGCCCTCACCAATCAACAT      |                                        |                                             |                          | 1                                       |                                           |                        |
|                               |                        | chr8:131,177,663-131,179,109  | 3 GGCAAGGCCAAACACTACAT  | CCCTTTTCTAGCCTGCTTC      |                                        |                                             |                          | 1                                       |                                           |                        |
|                               |                        | chr6:31,037,647-31,038,728    | 4 CAGTCTGAAAGCAGCAAAAT  | CAGGCGGCTCTTAAAATG       |                                        |                                             |                          | 1                                       |                                           |                        |
|                               |                        | chr6:31,037,357-31,038,733    | 6 ACACACGAAACAGCAAAAG   | ACCTAGCCTCTGTGTGGAG      |                                        |                                             |                          | 1                                       |                                           |                        |
|                               |                        | chr10:5,056,630-5,057,713     | 7 TCCATCCACATAAGGGTGA   | GGCATTTTCAAAGCTGAATG     |                                        |                                             |                          | 1                                       |                                           |                        |
|                               |                        | chr6:4,406,665-4,407,901      | 8 ATCTCCGGAAGCCCTAATC   | GGAAGGAAAGCAAGGAAAC      |                                        |                                             |                          | 1                                       |                                           |                        |
|                               |                        | chr2:30,319,171-30,320,263    | 9 TTTCCAGTTGGTGGATGACA  | AAGCAGCAACAGCACATCAC     |                                        |                                             |                          | 1                                       |                                           |                        |
|                               |                        | chr1:184,449,607-184,450,750  | 10 TCAACTCCCAACTAGGCC   | AGGCTTAGTCCAGTCCACCA     |                                        |                                             |                          | 1                                       |                                           |                        |
|                               |                        | chr11:94,793,896-94,795,214   | 11 GCTTCAGTCTCCATGTTCTG | AGCAAAAGCCAGAACTCCA      |                                        |                                             |                          | 1                                       |                                           |                        |
|                               |                        | chr1:173,192,458-173,193,486  | 12 AGTTCTCAATGCTGGCAAC  | CCCCAGCAACAGTCAAT        |                                        |                                             |                          | 1                                       |                                           |                        |
|                               |                        | chr6:4,438,664-4,440,057      | 13 TCCCAATTTTCTCTGTG    | GCATGGAATTACGCTGTGTG     |                                        |                                             |                          | 1                                       |                                           |                        |
|                               |                        | chr19:54,189,128-54,190,170   | 1 GACAAGACACCATGGCAGAA  | TCACACTGTCTGCTGGGAA      |                                        |                                             |                          | 1                                       |                                           |                        |
| chr1:78,199,770-78,201,041    | 2 TGGTAGTGGGATCCATGTT  | GGGGAGATGAAGGGATTGG           |                         |                          |                                        | 1                                           |                          |                                         |                                           |                        |
| chr4:8,954,712-8,956,015      | 3 TGGAGATGGGACAGAGTTG  | TACGTGGGAAAGACGTAGG           |                         |                          |                                        | 1                                           |                          |                                         |                                           |                        |
| chr11:96,176,070-96,177,089   | 4 CGGTTTTCCGATACAAAT   | GCCTCTTATAGGCGAGCT            |                         |                          |                                        | 1                                           |                          |                                         |                                           |                        |
| chr18:13,107,342-13,108,338   | 5 TGCACTGACACTGTGAGTCT | CCTGCTGTTGATCACTGCT           |                         |                          |                                        | 1                                           |                          |                                         |                                           |                        |
| chr3:89,907,851-89,908,955    | 6 AATGAACCAACAGAGAACG  | TGGAAAGGATTGTGGGAG            |                         |                          |                                        | 1                                           |                          |                                         |                                           |                        |
| chr14:118,400,191-118,401,401 | 7 CAGGTTCACTGAGCTTGACA | AATCCACAGTACAGCTTTG           |                         |                          |                                        | 1                                           |                          |                                         |                                           |                        |
| chr5:13,628,493-13,629,571    | 8 AGTCAAAAACCTGCCACAT  | GGGAACGACAAACAACAAC           |                         |                          |                                        | 1                                           |                          |                                         |                                           |                        |
| chr1:156,730,738-156,732,002  | 9 ACCCCACCAAGAAACATACA | GATTTAGCGGGGTCTAGGG           |                         |                          |                                        | 1                                           |                          |                                         |                                           |                        |
| chr14:68,230,847-68,232,082   | 10 CTACCCAGCTTCCACAAA  | CGATAGACTGGGATTTGCT           |                         |                          |                                        | 1                                           |                          |                                         |                                           |                        |
| chr10:126,246,319-126,247,564 | 11 CTGGTACAGCCATAAAT   | ACCTGCTCTCCAGTGTG             |                         |                          |                                        | 1                                           |                          |                                         |                                           |                        |
| chr2:65,656,036-65,657,985    | 12 TTTTTCATGGAAAGCCAGT | CCACATGAAAACAGAAATTGC         |                         |                          |                                        | 1                                           |                          |                                         |                                           |                        |
| chr14:87,967,514-87,968,917   | 13 ATCTCGGTTCTGGTACTG  | GGTTATGGCGTCTGACTT            |                         |                          |                                        | 1                                           |                          |                                         |                                           |                        |

**Supplementary Table 10: List of 183 predicted enhancers tested in a high throughput reporter assay.**

| ID       | chr   | start     | end       | # reads RNA | RPKM      | # reads DNA | RPKM      | log2(RNA/DNA) | Validation |
|----------|-------|-----------|-----------|-------------|-----------|-------------|-----------|---------------|------------|
| ESC-E1   | chr1  | 182854696 | 182855674 | 99971       | 4910.627  | 114185      | 3986.0389 | 0.301         | Positive   |
| ESC-E10  | chr2  | 171811722 | 171812747 | 119000      | 5577.5654 | 183281      | 6104.9676 | -0.1303       | Negative   |
| ESC-E100 | chr15 | 61826135  | 61827093  | 38497       | 1930.4596 | 41533       | 1480.1274 | 0.3832        | Positive   |
| ESC-E101 | chr1  | 55165093  | 55166107  | 196788      | 9323.4378 | 181721      | 6118.604  | 0.6077        | Positive   |
| ESC-E102 | chr1  | 89625428  | 89626417  | 96502       | 4687.561  | 171590      | 5923.3878 | -0.3376       | Negative   |
| ESC-E103 | chr1  | 120586239 | 120587188 | 87195       | 4413.8145 | 61221       | 2202.401  | 1.0029        | Positive   |
| ESC-E104 | chr1  | 121295046 | 121296025 | 86568       | 4247.9324 | 93656       | 3266.0731 | 0.3792        | Positive   |
| ESC-E105 | chr1  | 133045795 | 133046795 | 44945       | 2159.2282 | 62554       | 2135.7032 | 0.0158        | Positive   |
| ESC-E106 | chr1  | 137753335 | 137754335 | 75408       | 3622.6845 | 101514      | 3465.8347 | 0.0639        | Positive   |
| ESC-E107 | chr1  | 145402355 | 145403355 | 104899      | 5039.4456 | 143837      | 4910.7823 | 0.0373        | Positive   |
| ESC-E108 | chr1  | 166447135 | 166448135 | 86535       | 4157.2307 | 119261      | 4071.7342 | 0.03          | Positive   |
| ESC-E109 | chr10 | 60534775  | 60535775  | 88918       | 4271.7111 | 110747      | 3781.0582 | 0.176         | Positive   |
| ESC-E11  | chr17 | 15816990  | 15818001  | 136245      | 6474.1774 | 190643      | 6438.0367 | 0.0081        | Positive   |
| ESC-E110 | chr10 | 75111855  | 75112855  | 103280      | 4961.6681 | 63960       | 2183.7054 | 1.184         | Positive   |
| ESC-E111 | chr10 | 99626895  | 99627895  | 174194      | 8368.4088 | 310776      | 10610.239 | -0.3424       | Negative   |
| ESC-E112 | chr11 | 5872835   | 5873835   | 124998      | 6005.0107 | 89621       | 3059.7964 | 0.9727        | Positive   |
| ESC-E113 | chr11 | 9021995   | 9022995   | 88593       | 4256.0979 | 150058      | 5123.1732 | -0.2675       | Negative   |
| ESC-E114 | chr1  | 21245800  | 21246800  | 165597      | 7955.405  | 123709      | 4223.5932 | 0.9135        | Positive   |
| ESC-E115 | chr1  | 36901550  | 36902550  | 87005       | 4179.8097 | 88044       | 3005.9561 | 0.4756        | Positive   |
| ESC-E116 | chr1  | 37956700  | 37957700  | 126586      | 6081.2989 | 144061      | 4918.4299 | 0.3062        | Positive   |
| ESC-E117 | chr1  | 38115028  | 38115996  | 146995      | 7294.9605 | 232935      | 8215.2983 | -0.1714       | Negative   |
| ESC-E118 | chr1  | 53923075  | 53924075  | 81676       | 3923.8021 | 178256      | 6085.8798 | -0.6332       | Negative   |
| ESC-E12  | chr10 | 92826779  | 92827779  | 120126      | 5770.9576 | 134607      | 4595.6613 | 0.3285        | Positive   |
| ESC-E120 | chr2  | 20689850  | 20690850  | 77534       | 3724.8186 | 138298      | 4721.6756 | -0.3421       | Negative   |
| ESC-E121 | chr2  | 20701043  | 20702018  | 301239      | 14842.396 | 292618      | 10246.206 | 0.5346        | Positive   |
| ESC-E124 | chr2  | 28929984  | 28930939  | 123541      | 6214.3813 | 133756      | 4781.5604 | 0.3781        | Positive   |
| ESC-E125 | chr2  | 29584734  | 29585699  | 54615       | 2718.842  | 57738       | 2042.7018 | 0.4125        | Positive   |
| ESC-E126 | chr2  | 30336557  | 30337536  | 131794      | 6467.1674 | 115913      | 4042.2313 | 0.678         | Positive   |
| ESC-E127 | chr2  | 32794674  | 32795659  | 79008       | 3853.3723 | 145350      | 5037.9303 | -0.3867       | Negative   |
| ESC-E128 | chr2  | 50862975  | 50863975  | 137561      | 6608.5429 | 181269      | 6188.7465 | 0.0947        | Positive   |
| ESC-E129 | chr2  | 109748850 | 109749850 | 85117       | 4089.1093 | 201730      | 6887.3045 | -0.7522       | Negative   |
| ESC-E13  | chr8  | 74857499  | 74858512  | 164899      | 7820.311  | 249553      | 8410.7969 | -0.105        | Positive   |
| ESC-E130 | chr2  | 120339667 | 120340635 | 191375      | 9497.4036 | 166049      | 5856.3351 | 0.6975        | Positive   |
| ESC-E131 | chr3  | 33905123  | 33906100  | 108730      | 5346.3302 | 236214      | 8254.2788 | -0.6266       | Negative   |
| ESC-E132 | chr11 | 20136900  | 20137872  | 13752       | 679.7139  | 7583        | 266.3909  | 1.3514        | Positive   |
| ESC-E133 | chr7  | 51757050  | 51758050  | 141885      | 6816.2698 | 168198      | 5742.4901 | 0.2473        | Positive   |
| ESC-E134 | chr7  | 52654300  | 52655300  | 27015       | 1297.8629 | 53714       | 1833.8972 | -0.4988       | Negative   |
| ESC-E135 | chr3  | 34544700  | 34545700  | 61508       | 2954.9222 | 86048       | 2937.8108 | 0.0084        | Positive   |
| ESC-E137 | chr3  | 94875800  | 94876800  | 116657      | 5604.3052 | 176733      | 6033.8831 | -0.1066       | Positive   |
| ESC-E138 | chr3  | 107767000 | 107768000 | 105290      | 5058.2294 | 103497      | 3533.5363 | 0.5175        | Positive   |
| ESC-E139 | chr3  | 129276350 | 129277350 | 137918      | 6625.6933 | 190948      | 6519.1968 | 0.0234        | Positive   |
| ESC-E14  | chr12 | 25854076  | 25855103  | 199325      | 9324.2126 | 182374      | 6062.9378 | 0.621         | Positive   |
| ESC-E140 | chr4  | 10970754  | 10971716  | 105276      | 5257.1262 | 175656      | 6233.7576 | -0.2458       | Negative   |
| ESC-E142 | chr4  | 48634200  | 48635200  | 141674      | 6806.1333 | 191425      | 6535.482  | 0.0585        | Positive   |
| ESC-E143 | chr4  | 55003500  | 55004500  | 79981       | 3842.3735 | 195862      | 6686.9654 | -0.7994       | Negative   |
| ESC-E144 | chr4  | 108306800 | 108307800 | 115099      | 5529.4582 | 148064      | 5055.0961 | 0.1294        | Positive   |
| ESC-E145 | chr4  | 116842950 | 116843950 | 294217      | 14134.368 | 333854      | 11398.144 | 0.3104        | Positive   |
| ESC-E147 | chr5  | 38911677  | 38912647  | 4036        | 199.9317  | 1403        | 49.4297   | 2.0161        | Positive   |
| ESC-E148 | chr5  | 67111900  | 67112900  | 36989       | 1777.0183 | 47945       | 1636.938  | 0.1185        | Positive   |
| ESC-E149 | chr5  | 76022475  | 76023475  | 142416      | 6841.7793 | 128531      | 4388.2209 | 0.6407        | Positive   |
| ESC-E15  | chr4  | 115583944 | 115584945 | 104069      | 4994.5825 | 106089      | 3618.4149 | 0.465         | Positive   |
| ESC-E150 | chr5  | 128129750 | 128130750 | 60046       | 2884.6871 | 73107       | 2495.9927 | 0.2088        | Positive   |
| ESC-E151 | chr6  | 30103450  | 30104450  | 182968      | 8789.9158 | 120901      | 4127.7254 | 1.0905        | Positive   |
| ESC-E152 | chr6  | 30107125  | 30108125  | 92425       | 4440.189  | 151301      | 5165.6104 | -0.2183       | Negative   |
| ESC-E153 | chr6  | 30147450  | 30148450  | 137014      | 6582.2648 | 149179      | 5093.1633 | 0.37          | Positive   |
| ESC-E154 | chr6  | 35185250  | 35186250  | 78070       | 3750.5682 | 134610      | 4595.7637 | -0.2932       | Negative   |
| ESC-E155 | chr6  | 49082350  | 49083350  | 110865      | 5326.0549 | 124127      | 4237.8641 | 0.3297        | Positive   |
| ESC-E156 | chr6  | 54622600  | 54623600  | 127322      | 6116.6567 | 155960      | 5324.6731 | 0.2001        | Positive   |

|          |       |           |           |        |           |        |           |         |          |
|----------|-------|-----------|-----------|--------|-----------|--------|-----------|---------|----------|
| ESC-E158 | chr6  | 100402200 | 100403200 | 100071 | 4807.5063 | 151370 | 5167.9661 | -0.1043 | Positive |
| ESC-E16  | chr16 | 13732499  | 13733518  | 193782 | 9136.0153 | 176201 | 5903.6635 | 0.63    | Positive |
| ESC-E160 | chr6  | 125391550 | 125392550 | 175850 | 8447.9638 | 186422 | 6364.6748 | 0.4085  | Positive |
| ESC-E161 | chr6  | 136761475 | 136762475 | 64536  | 3100.3887 | 160257 | 5471.3768 | -0.8195 | Negative |
| ESC-E162 | chr7  | 4773250   | 4774250   | 201263 | 9668.8159 | 224619 | 7668.7568 | 0.3343  | Positive |
| ESC-E163 | chr7  | 36247400  | 36248400  | 118584 | 5696.8792 | 169491 | 5786.6343 | -0.0226 | Positive |
| ESC-E164 | chr7  | 50802475  | 50803475  | 131815 | 6332.5024 | 122851 | 4194.3003 | 0.5943  | Positive |
| ESC-E165 | chr7  | 52654300  | 52655300  | 27015  | 1297.8629 | 53714  | 1833.8972 | -0.4988 | Negative |
| ESC-E166 | chr7  | 71974650  | 71975650  | 120744 | 5800.6466 | 193127 | 6593.5899 | -0.1849 | Negative |
| ESC-E167 | chr7  | 86284050  | 86285050  | 218858 | 10514.088 | 251297 | 8579.5692 | 0.2933  | Positive |
| ESC-E168 | chr7  | 87383100  | 87384100  | 135604 | 6514.5277 | 78630  | 2684.5532 | 1.279   | Positive |
| ESC-E169 | chr7  | 134000050 | 134001050 | 91807  | 4410.5    | 88010  | 3004.7953 | 0.5537  | Positive |
| ESC-E17  | chr2  | 5981071   | 5982079   | 1833   | 87.41     | 5218   | 176.785   | -1.0161 | Negative |
| ESC-E171 | chr7  | 152074175 | 152075175 | 123845 | 5949.62   | 98740  | 3371.1277 | 0.8196  | Positive |
| ESC-E172 | chr8  | 24509700  | 24510700  | 147245 | 7073.7666 | 122988 | 4198.9776 | 0.7524  | Positive |
| ESC-E173 | chr8  | 42173350  | 42174350  | 147532 | 7087.5542 | 198502 | 6777.0975 | 0.0646  | Positive |
| ESC-E174 | chr8  | 72536950  | 72537950  | 116816 | 5611.9437 | 173263 | 5915.414  | -0.076  | Positive |
| ESC-E175 | chr8  | 74851250  | 74852250  | 91732  | 4406.8969 | 138280 | 4721.061  | -0.0993 | Positive |
| ESC-E177 | chr8  | 89298950  | 89299950  | 142272 | 6834.8615 | 217445 | 7423.8296 | -0.1193 | Negative |
| ESC-E178 | chr8  | 91497750  | 91498750  | 94639  | 4546.5505 | 139775 | 4772.1018 | -0.0699 | Positive |
| ESC-E179 | chr8  | 119458400 | 119459400 | 125547 | 6031.3849 | 152383 | 5202.5509 | 0.2133  | Positive |
| ESC-E18  | chr7  | 4773684   | 4774673   | 244295 | 11866.493 | 224904 | 7763.803  | 0.6121  | Positive |
| ESC-E180 | chr8  | 124404400 | 124405400 | 54451  | 2615.9008 | 82966  | 2832.5883 | -0.1148 | Positive |
| ESC-E181 | chr9  | 60669000  | 60670000  | 219020 | 10521.87  | 195455 | 6673.0701 | 0.657   | Positive |
| ESC-E182 | chr9  | 99053600  | 99054600  | 122931 | 5905.711  | 131838 | 4501.125  | 0.3918  | Positive |
| ESC-E183 | chr9  | 118991100 | 118992100 | 188801 | 9070.1357 | 128401 | 4383.7826 | 1.0489  | Positive |
| ESC-E184 | chr9  | 121523275 | 121524275 | 178960 | 8597.3696 | 129001 | 4404.2671 | 0.965   | Positive |
| ESC-E185 | chr10 | 42366000  | 42367000  | 98274  | 4721.1776 | 173275 | 5915.8237 | -0.3254 | Negative |
| ESC-E187 | chr11 | 49619300  | 49620300  | 112432 | 5401.3343 | 139534 | 4763.8738 | 0.1812  | Positive |
| ESC-E188 | chr12 | 77310200  | 77311200  | 191581 | 9203.6882 | 175722 | 5999.3666 | 0.6174  | Positive |
| ESC-E189 | chr13 | 112509750 | 112510750 | 128728 | 6184.2016 | 159107 | 5432.1147 | 0.1871  | Positive |
| ESC-E19  | chr7  | 36252539  | 36253574  | 118044 | 5479.3533 | 149415 | 4928.8837 | 0.1527  | Positive |
| ESC-E190 | chr14 | 27860050  | 27861050  | 99358  | 4773.2534 | 113443 | 3873.1022 | 0.3015  | Positive |
| ESC-E191 | chr14 | 30763950  | 30764950  | 302653 | 14539.638 | 216059 | 7376.5103 | 0.979   | Positive |
| ESC-E192 | chr14 | 56169700  | 56170700  | 119567 | 5744.103  | 223161 | 7618.9793 | -0.4075 | Negative |
| ESC-E193 | chr15 | 99380100  | 99381100  | 167678 | 8055.3772 | 138335 | 4722.9388 | 0.7703  | Positive |
| ESC-E194 | chr16 | 65648850  | 65649850  | 37381  | 1795.8502 | 73106  | 2495.9585 | -0.4749 | Negative |
| ESC-E195 | chr17 | 35635750  | 35636750  | 114367 | 5494.2926 | 168392 | 5749.1134 | -0.0654 | Positive |
| ESC-E196 | chrX  | 73843900  | 73844900  | 27761  | 1333.701  | 87931  | 3002.0982 | -1.1705 | Negative |
| ESC-E197 | chr4  | 55527350  | 55528397  | 115409 | 5295.7037 | 74457  | 2428.0796 | 1.125   | Positive |
| ESC-E198 | chr16 | 48303488  | 48304467  | 24221  | 1188.5719 | 20876  | 728.0493  | 0.7071  | Positive |
| ESC-E2   | chr1  | 120544330 | 120545378 | 214978 | 9855.1199 | 124276 | 4048.805  | 1.2834  | Positive |
| ESC-E20  | chr15 | 84487613  | 84488671  | 131931 | 5990.95   | 128351 | 4142.0779 | 0.5324  | Positive |
| ESC-E200 | chr8  | 74857330  | 74858302  | 149773 | 7402.268  | 203643 | 7152.69   | 0.0495  | Positive |
| ESC-E201 | chr5  | 120162398 | 120163368 | 119338 | 5910.23   | 121477 | 4275.5268 | 0.4671  | Positive |
| ESC-E202 | chr2  | 168594397 | 168595368 | 96819  | 4790.0499 | 98344  | 3457.782  | 0.4702  | Positive |
| ESC-E21  | chr12 | 55211145  | 55212173  | 156089 | 7294.5932 | 169511 | 5629.8405 | 0.3737  | Positive |
| ESC-E22  | chr13 | 64081221  | 64082236  | 181170 | 8575.0426 | 171837 | 5780.1147 | 0.569   | Positive |
| ESC-E23  | chr17 | 41036531  | 41037557  | 128473 | 6015.7006 | 222079 | 7390.0897 | -0.2969 | Negative |
| ESC-E26  | chr7  | 86284032  | 86285007  | 218858 | 10783.402 | 251297 | 8799.3314 | 0.2933  | Positive |
| ESC-E27  | chr8  | 94445910  | 94446903  | 26871  | 1300.0358 | 29449  | 1012.5473 | 0.3606  | Positive |
| ESC-E28  | chr10 | 27731682  | 27732646  | 69031  | 3440.0467 | 95025  | 3365.3229 | 0.0317  | Positive |
| ESC-E29  | chr2  | 171704503 | 171705469 | 46255  | 2300.2913 | 68339  | 2415.2431 | -0.0704 | Positive |
| ESC-E3   | chr2  | 118824013 | 118825028 | 179728 | 8506.7911 | 244471 | 8223.2975 | 0.0489  | Positive |
| ESC-E30  | chr4  | 108052394 | 108053383 | 101765 | 4943.2072 | 75978  | 2622.8332 | 0.9143  | Positive |
| ESC-E31  | chr8  | 42173639  | 42174632  | 156135 | 7553.6688 | 249913 | 8592.4045 | -0.1859 | Negative |
| ESC-E33  | chr14 | 76480936  | 76481885  | 6903   | 349.4762  | 12438  | 447.4919  | -0.3567 | Negative |
| ESC-E34  | chr18 | 4403814   | 4404743   | 6181   | 319.6575  | 10005  | 367.7079  | -0.202  | Negative |
| ESC-E36  | chr2  | 58480149  | 58481060  | 65584  | 3458.2033 | 88305  | 3309.076  | 0.0636  | Positive |
| ESC-E37  | chrX  | 99182025  | 99182925  | 51401  | 2743.4426 | 76145  | 2888.2437 | -0.0742 | Positive |
| ESC-E38  | chr6  | 17571043  | 17571991  | 23794  | 1205.7588 | 24090  | 867.5716  | 0.4749  | Positive |

|         |       |           |           |        |           |        |           |         |          |
|---------|-------|-----------|-----------|--------|-----------|--------|-----------|---------|----------|
| ESC-E39 | chr12 | 120004596 | 120005499 | 73161  | 3891.8667 | 91732  | 3467.9148 | 0.1664  | Positive |
| ESC-E4  | chr8  | 97710983  | 97711993  | 121611 | 5784.5108 | 188911 | 6385.8574 | -0.1427 | Negative |
| ESC-E41 | chr2  | 147118424 | 147119401 | 27810  | 1367.4744 | 44666  | 1560.8524 | -0.1908 | Negative |
| ESC-E42 | chr12 | 71038410  | 71039332  | 112040 | 5837.3576 | 120517 | 4462.325  | 0.3875  | Positive |
| ESC-E44 | chr14 | 20680136  | 20681089  | 60048  | 3026.9032 | 58522  | 2096.4807 | 0.5299  | Positive |
| ESC-E45 | chr7  | 4653663   | 4654607   | 51640  | 2627.8699 | 61909  | 2238.9346 | 0.2311  | Positive |
| ESC-E46 | chr5  | 53301450  | 53302370  | 80708  | 4214.085  | 104564 | 3880.055  | 0.1191  | Positive |
| ESC-E47 | chr17 | 7444695   | 7445609   | 48431  | 2545.3766 | 38776  | 1448.327  | 0.8135  | Positive |
| ESC-E48 | chr11 | 100136383 | 100137293 | 59738  | 3153.4095 | 120007 | 4501.9716 | -0.5136 | Negative |
| ESC-E49 | chr18 | 25547503  | 25548453  | 39178  | 1981.1342 | 55633  | 1999.2751 | -0.0132 | Positive |
| ESC-E5  | chr6  | 55741713  | 55742726  | 167420 | 7939.8683 | 207256 | 6985.2506 | 0.1848  | Positive |
| ESC-E50 | chr1  | 3472699   | 3473648   | 57321  | 2901.6085 | 104845 | 3771.7213 | -0.3784 | Negative |
| ESC-E51 | chr2  | 31995916  | 31996896  | 94182  | 4616.8396 | 90364  | 3148.0604 | 0.5524  | Positive |
| ESC-E52 | chr10 | 33949762  | 33950731  | 91008  | 4511.8414 | 180903 | 6373.6346 | -0.4984 | Negative |
| ESC-E53 | chr9  | 58418474  | 58419426  | 101713 | 5132.5002 | 142529 | 5111.2169 | 0.006   | Positive |
| ESC-E54 | chr1  | 91772860  | 91773820  | 84939  | 4250.4024 | 104880 | 3729.7939 | 0.1885  | Positive |
| ESC-E55 | chr17 | 71121493  | 71122443  | 38527  | 1948.2155 | 64781  | 2328.0172 | -0.2569 | Negative |
| ESC-E56 | chr13 | 86237126  | 86238080  | 37618  | 1894.2835 | 44116  | 1578.7604 | 0.2629  | Positive |
| ESC-E57 | chr3  | 137496052 | 137497014 | 142053 | 7093.6272 | 177134 | 6286.2091 | 0.1743  | Positive |
| ESC-E58 | chr2  | 141092234 | 141093199 | 111037 | 5527.5885 | 159794 | 5653.2333 | -0.0324 | Positive |
| ESC-E6  | chr2  | 28462521  | 28463544  | 134206 | 6302.5544 | 142589 | 4758.8318 | 0.4053  | Positive |
| ESC-E60 | chr14 | 79509623  | 79510586  | 92812  | 4629.9145 | 74243  | 2632.064  | 0.8148  | Positive |
| ESC-E61 | chr18 | 44525448  | 44526440  | 27494  | 1331.5153 | 43865  | 1509.7081 | -0.1812 | Negative |
| ESC-E62 | chr3  | 107798742 | 107799702 | 36286  | 1815.8035 | 42403  | 1507.986  | 0.268   | Positive |
| ESC-E63 | chr3  | 104618095 | 104619084 | 22042  | 1070.7233 | 38845  | 1340.991  | -0.3247 | Negative |
| ESC-E64 | chr8  | 58730595  | 58731581  | 61913  | 3016.5677 | 61327  | 2123.511  | 0.5065  | Positive |
| ESC-E65 | chr13 | 16921782  | 16922764  | 63554  | 3109.1204 | 88584  | 3079.7718 | 0.0137  | Positive |
| ESC-E66 | chr16 | 56901932  | 56902893  | 47611  | 2380.0306 | 39730  | 1411.4601 | 0.7538  | Positive |
| ESC-E67 | chr14 | 30763757  | 30764720  | 298268 | 14878.949 | 206702 | 7327.9134 | 1.0218  | Positive |
| ESC-E68 | chr1  | 17921912  | 17922867  | 66205  | 3330.2788 | 79997  | 2859.7833 | 0.2197  | Positive |
| ESC-E69 | chr6  | 68802399  | 68803383  | 20196  | 986.035   | 24504  | 850.2292  | 0.2138  | Positive |
| ESC-E7  | chr2  | 129410365 | 129411379 | 52590  | 2491.6499 | 80591  | 2713.5525 | -0.1231 | Negative |
| ESC-E70 | chr4  | 10970134  | 10971087  | 47627  | 2400.795  | 69878  | 2503.2861 | -0.0603 | Positive |
| ESC-E71 | chr2  | 36270509  | 36271461  | 47863  | 2415.2227 | 89698  | 3216.6687 | -0.4134 | Negative |
| ESC-E72 | chr7  | 97687774  | 97688743  | 97734  | 4845.2881 | 160626 | 5659.2342 | -0.224  | Negative |
| ESC-E73 | chr3  | 83985406  | 83986372  | 33310  | 1656.542  | 72452  | 2560.6022 | -0.6283 | Negative |
| ESC-E74 | chr6  | 4982813   | 4983806   | 68853  | 3331.0732 | 76794  | 2640.3339 | 0.3353  | Positive |
| ESC-E75 | chr14 | 99747416  | 99748389  | 109553 | 5408.9194 | 133109 | 4670.4942 | 0.2118  | Positive |
| ESC-E76 | chr7  | 65923805  | 65924781  | 71225  | 3505.7849 | 108904 | 3809.4712 | -0.1199 | Negative |
| ESC-E77 | chr15 | 9382274   | 9383260   | 100065 | 4875.4048 | 97133  | 3363.3017 | 0.5356  | Positive |
| ESC-E78 | chr9  | 9268943   | 9269894   | 65060  | 3286.4339 | 45016  | 1616.0437 | 1.0241  | Positive |
| ESC-E79 | chr1  | 142084819 | 142085770 | 40548  | 2048.2562 | 62367  | 2238.9136 | -0.1284 | Negative |
| ESC-E8  | chr8  | 91525792  | 91526825  | 262634 | 12214.435 | 177411 | 5863.7228 | 1.0587  | Positive |
| ESC-E80 | chr11 | 97215732  | 97216701  | 19638  | 973.6189  | 33522  | 1181.099  | -0.2787 | Negative |
| ESC-E81 | chr19 | 55493055  | 55494004  | 70199  | 3553.486  | 114724 | 4127.1063 | -0.2159 | Negative |
| ESC-E82 | chr5  | 18070759  | 18071737  | 54917  | 2697.5738 | 43437  | 1516.356  | 0.8311  | Positive |
| ESC-E83 | chr5  | 18070851  | 18071816  | 54917  | 2733.8759 | 42510  | 1503.9664 | 0.8622  | Positive |
| ESC-E84 | chr19 | 41021229  | 41022183  | 43544  | 2192.6839 | 78284  | 2801.4773 | -0.3535 | Negative |
| ESC-E85 | chr12 | 37806323  | 37807280  | 98389  | 4938.8588 | 142100 | 5069.2368 | -0.0376 | Positive |
| ESC-E86 | chr18 | 31728208  | 31729158  | 72561  | 3669.187  | 130713 | 4697.3466 | -0.3564 | Negative |
| ESC-E87 | chr19 | 20998236  | 20999229  | 25212  | 1219.7755 | 30380  | 1044.5564 | 0.2237  | Positive |
| ESC-E88 | chr6  | 64951947  | 64952897  | 109009 | 5512.2253 | 169175 | 6079.5154 | -0.1413 | Negative |
| ESC-E89 | chr12 | 4358406   | 4359368   | 90212  | 4504.8883 | 88356  | 3135.6415 | 0.5227  | Positive |
| ESC-E9  | chr4  | 10859231  | 10860280  | 46182  | 2115.1194 | 80203  | 2610.4739 | -0.3036 | Negative |
| ESC-E90 | chr11 | 9951289   | 9952244   | 91930  | 4624.2919 | 144651 | 5171.0349 | -0.1612 | Negative |
| ESC-E91 | chr8  | 109785728 | 109786686 | 75394  | 3780.6381 | 93882  | 3345.6456 | 0.1763  | Positive |
| ESC-E92 | chr1  | 84886510  | 84887461  | 89974  | 4544.9178 | 83513  | 2998.0171 | 0.6002  | Positive |
| ESC-E93 | chr10 | 68497183  | 68498132  | 55188  | 2793.6372 | 136761 | 4919.8606 | -0.8165 | Negative |
| ESC-E94 | chr4  | 84307834  | 84308786  | 14097  | 711.3863  | 38189  | 1369.5282 | -0.945  | Negative |
| ESC-E95 | chr11 | 8571508   | 8572457   | 29177  | 1476.9742 | 60246  | 2167.3266 | -0.5533 | Negative |
| ESC-E96 | chr17 | 35635745  | 35636736  | 114367 | 5544.1396 | 168392 | 5801.2723 | -0.0654 | Positive |



|         |       |           |           |        |           |        |           |         |          |
|---------|-------|-----------|-----------|--------|-----------|--------|-----------|---------|----------|
| ESC-E97 | chr3  | 34566928  | 34567886  | 47019  | 2357.7903 | 92131  | 3283.2467 | -0.4777 | Negative |
| ESC-E98 | chr4  | 55554567  | 55555518  | 62006  | 3132.1668 | 164767 | 5914.8901 | -0.9172 | Negative |
| ESC-E99 | chr6  | 122665619 | 122666581 | 48264  | 2410.1674 | 49284  | 1749.0483 | 0.4626  | Positive |
| Neg1    | chr8  | 24322802  | 24323828  | 70856  | 3317.8283 | 146748 | 4883.3282 | -0.5576 |          |
| Neg10   | chr6  | 10435078  | 10436122  | 81772  | 3763.0092 | 423197 | 13840.048 | -1.8789 |          |
| Neg11   | chr18 | 60511562  | 60512551  | 102322 | 4970.2631 | 227051 | 7837.918  | -0.6571 |          |
| Neg12   | chr1  | 6285016   | 6285968   | 83123  | 4194.4466 | 265527 | 9521.9915 | -1.1828 |          |
| Neg13   | chr1  | 7844595   | 7845548   | 12782  | 644.3552  | 45752  | 1639.0216 | -1.3469 |          |
| Neg14   | chr2  | 7728265   | 7729228   | 40284  | 2009.5904 | 132569 | 4699.7991 | -1.2257 |          |
| Neg15   | chr3  | 18648999  | 18649997  | 63136  | 3039.2043 | 99583  | 3406.7151 | -0.1647 |          |
| Neg16   | chr4  | 12792115  | 12793107  | 50011  | 2421.957  | 183775 | 6324.8516 | -1.3849 |          |
| Neg17   | chr5  | 10115318  | 10116288  | 25573  | 1266.5454 | 115566 | 4067.4846 | -1.6832 |          |
| Neg18   | chr6  | 6463178   | 6464160   | 76126  | 3724.1443 | 188592 | 6556.6618 | -0.8161 |          |
| Neg19   | chr7  | 10925589  | 10926543  | 19641  | 989.0616  | 50089  | 1792.5069 | -0.8578 |          |
| Neg2    | chr1  | 4026272   | 4027308   | 87789  | 4071.0633 | 153002 | 5042.343  | -0.3087 |          |
| Neg20   | chr8  | 15664223  | 15665213  | 41955  | 2035.9257 | 62828  | 2166.7027 | -0.0898 |          |
| Neg21   | chr9  | 5813564   | 5814538   | 66919  | 3300.5976 | 236944 | 8305.2639 | -1.3313 |          |
| Neg22   | chr11 | 10534440  | 10535390  | 56092  | 2836.4115 | 171224 | 6153.1482 | -1.1173 |          |
| Neg23   | chr12 | 10534097  | 10535080  | 48392  | 2364.9874 | 165723 | 5755.7402 | -1.2832 |          |
| Neg24   | chr13 | 10676652  | 10677603  | 60054  | 3033.5652 | 205425 | 7374.4395 | -1.2815 |          |
| Neg25   | chr14 | 9870734   | 9871711   | 80596  | 3962.9746 | 142159 | 4967.6341 | -0.326  |          |
| Neg26   | chr15 | 6076833   | 6077804   | 56762  | 2808.2795 | 209268 | 7357.8212 | -1.3896 |          |
| Neg27   | chr16 | 12407909  | 12408885  | 49282  | 2425.738  | 88054  | 3080.146  | -0.3446 |          |
| Neg28   | chr17 | 17036087  | 17037040  | 54694  | 2757.0229 | 173508 | 6215.6184 | -1.1728 |          |
| Neg29   | chr18 | 8424984   | 8425980   | 12480  | 602.0003  | 43857  | 1503.3771 | -1.3204 |          |
| Neg3    | chr2  | 4004184   | 4005157   | 130127 | 6424.7025 | 178340 | 6257.5308 | 0.038   |          |
| Neg30   | chr19 | 8519452   | 8520441   | 31357  | 1523.1923 | 79921  | 2758.9467 | -0.857  |          |
| Neg4    | chr3  | 6326753   | 6327840   | 91772  | 4056.2791 | 233033 | 7319.8338 | -0.8517 |          |
| Neg5    | chr4  | 7456053   | 7456979   | 117701 | 6105.8363 | 292732 | 10792.007 | -0.8217 |          |
| Neg6    | chr6  | 7362387   | 7363366   | 106281 | 5215.2472 | 225610 | 7867.6449 | -0.5932 |          |
| Neg7    | chr9  | 6027395   | 6028301   | 163816 | 8685.4577 | 546883 | 20606.2   | -1.2464 |          |
| Neg9    | chr3  | 10996635  | 10997622  | 91772  | 4466.8286 | 436409 | 15095.514 | -1.7568 |          |

**Supplementary Table S14: Summary of the 1:1 and many to 1 human/mouse orthologous genes.**

|                   | <b>1:1</b> | <b>1:many<br/>(hsap:mmus)</b> | <b>many:1<br/>(hsap:mmus)</b> | <b>many:many</b>   |
|-------------------|------------|-------------------------------|-------------------------------|--------------------|
| <b>MIT</b>        | 15566      | 2293 (625:2293)               | 977 (977:389)                 | 6177<br>(771:1099) |
| <b>Ensembl</b>    | 15782      | 1492 (437:1492)               | 703 (703:294)                 | 2580 (458:552)     |
| <b>Merged set</b> | 15736      | 1527 (484:1527)               | 758 (758:321)                 | 1835 (396:503)     |



Supplementary Table 20: RNA-Seq datasets used for PCA analysis

| organism            | lab      | cell          | category   | labExpId                              | localization          | readType  | rnaExtract | seqPlatform |
|---------------------|----------|---------------|------------|---------------------------------------|-----------------------|-----------|------------|-------------|
| human               | CSHL     | SK-N-SH       | Brain      | LID46598-LID46599                     |                       | longPolyA | cell       | 2x101D      |
|                     |          |               |            |                                       |                       | longPolyA | cell       | 2x101D      |
| human               | Caltech  | HepG2         | Liver      | Hepg2R2x75Il200Rep1-                  |                       | longPolyA | cell       | 2x76D       |
| Hepg2R2x75Il200Rep2 |          |               |            |                                       |                       | longPolyA | cell       | 2x76D       |
| mouse               | CSHL     | Kidney        | Kidney     | LID20872-LID20873                     |                       | longPolyA | cell       | 2x76D       |
|                     |          |               |            |                                       |                       | longPolyA | cell       | 2x76D       |
| human               | illumina |               | Adipose    | Adipose                               | hbmadiposePolyAP50    | polyA     | cell       |             |
|                     |          |               |            |                                       |                       | polyA     | cell       |             |
| human               | Caltech  | MCF-7         | Breast     | Mcf7R2x75Il200Rep1-Mcf7R2x75Il200Rep2 |                       | longPolyA | cell       | 2x76D       |
|                     |          |               |            |                                       |                       | longPolyA | cell       | 2x76D       |
| human               | illumina |               | Whiteblood | Blood                                 | hbmwhitebloodPolyAP50 | polyA     | cell       |             |
|                     |          |               |            |                                       |                       | polyA     | cell       |             |
| mouse               | CSHL     | Lung          | Lung       | LID20920-LID20921                     |                       | longPolyA | cell       | 2x76D       |
|                     |          |               |            |                                       |                       | longPolyA | cell       | 2x76D       |
| mouse               | CSHL     | SubcFatPad    | Adipose    | LID21181-LID21182                     |                       | longPolyA | cell       |             |
|                     |          |               |            |                                       |                       | longPolyA | cell       |             |
| human               | CSHL     | NHLF          | Lung       | LID8692-LID8701                       |                       | longPolyA | cell       | 2x76D       |
|                     |          |               |            |                                       |                       | longPolyA | cell       | 2x76D       |
| human               | illumina |               | Colon      | Intestine                             | hbmcolonPolyAP50      | polyA     | cell       |             |
|                     |          |               |            |                                       |                       | polyA     | cell       |             |
| human               | illumina |               | Brain      | Brain                                 | hbmbrainPolyAP50      | polyA     | cell       |             |
|                     |          |               |            |                                       |                       | polyA     | cell       |             |
| mouse               | CSHL     | Testis        | Testis     | LID20868-LID20869                     |                       | longPolyA | cell       | 2x76D       |
|                     |          |               |            |                                       |                       | longPolyA | cell       | 2x76D       |
| human               | CSHL     | MCF-7         | Breast     | LID8686-LID8687                       |                       | longPolyA | cell       | 2x76D       |
|                     |          |               |            |                                       |                       | longPolyA | cell       | 2x76D       |
| mouse               | CSHL     | GenitalFatPad | Adipose    | LID21179-LID21180                     |                       | longPolyA | cell       |             |
|                     |          |               |            |                                       |                       | longPolyA | cell       |             |
| human               | illumina |               | Breast     | Breast                                | hbmbreastPolyAP50     | polyA     | cell       |             |
|                     |          |               |            |                                       |                       | polyA     | cell       |             |
| mouse               | CSHL     | Cerebellum    | Brain      | LID47036-LID47037                     |                       | longPolyA | cell       |             |
|                     |          |               |            |                                       |                       | longPolyA | cell       |             |
| human               | illumina |               | Kidney     | Kidney                                | hbmkidneyPolyAP50     | polyA     | cell       |             |
|                     |          |               |            |                                       |                       | polyA     | cell       |             |
| mouse               | CSHL     | Heart         | Heart      | LID20870-LID20871                     |                       | longPolyA | cell       | 2x76D       |
|                     |          |               |            |                                       |                       | longPolyA | cell       | 2x76D       |
| human               | CSHL     | A549          | Lung       | LID8963-LID8964                       |                       | longPolyA | cell       | 2x76D       |
|                     |          |               |            |                                       |                       | longPolyA | cell       | 2x76D       |
| mouse               | CSHL     | Colon         | Intestine  | LID21040-LID21041                     |                       | longPolyA | cell       |             |
|                     |          |               |            |                                       |                       | longPolyA | cell       |             |
| mouse               | CSHL     | Cortex        | Brain      | LID47032-LID47033                     |                       | longPolyA | cell       | 2x101D      |
|                     |          |               |            |                                       |                       | longPolyA | cell       | 2x101D      |
| human               | illumina |               | Lung       | Lung                                  | hbmlungPolyAP50       | polyA     | cell       | 2x50        |
|                     |          |               |            |                                       |                       | polyA     | cell       | 2x50        |
| mouse               | CSHL     | Liver         | Liver      | LID21042-LID21043                     |                       | longPolyA | cell       | 2x76D       |
|                     |          |               |            |                                       |                       | longPolyA | cell       | 2x76D       |

|       |           |              |         |                                       |                    |        |
|-------|-----------|--------------|---------|---------------------------------------|--------------------|--------|
| mouse | CSHL      | Spleen       | Blood   | LID21038-LID21039                     | cell               | 2x76D  |
|       | longPolyA |              |         | Illumina_GA2x                         |                    |        |
| human | illumina  |              | Liver   | Liver                                 | hbmliverPolyAP50   | cell   |
|       | 2x50      | polyA        | NA      |                                       |                    |        |
| human | illumina  |              | Testis  | Testis                                | hbmtestisPolyAP50  | cell   |
|       | 2x50      | polyA        | NA      |                                       |                    |        |
| mouse | CSHL      | Adrenal      | Adrenal | LID20728-LID20729                     | cell               | 2x76D  |
|       | longPolyA |              |         | Illumina_GA2x                         |                    |        |
| human | Caltech   | NHLF         | Lung    | Nhlfr2x75Il200Rep1-Nhlfr2x75Il200Rep2 |                    |        |
|       | cell      | 2x75         |         | longPolyA                             |                    |        |
| human | CSHL      | HepG2        | Liver   | LID16635-LID16636                     | cell               | 2x76D  |
|       | longPolyA |              |         | Illumina_GA2x                         |                    |        |
| human | illumina  |              | Ovary   | Ovary                                 | hbmovaryPolyAP50   | cell   |
|       | 2x50      | polyA        | NA      |                                       |                    |        |
| human | CSHL      | SK-N-SH      | Brain   | LID8967-LID8968                       | cell               | 2x76D  |
|       | longPolyA |              |         | Illumina_GA2x                         |                    |        |
| human | illumina  |              | Adrenal | Adrenal                               | hbmadrenalPolyAP50 | cell   |
|       | 2x50      | polyA        | NA      |                                       |                    |        |
| human | illumina  |              | Heart   | Heart                                 | hbmheartPolyAP50   | cell   |
|       | 2x50      | polyA        | NA      |                                       |                    |        |
| human | CSHL      | CD20+        | Blood   | LID44498-LID44499                     | cell               | 2x76D  |
|       | longPolyA |              |         | Illumina_GA2x                         |                    |        |
| mouse | CSHL      | MammaryGland | Breast  | LID20924-LID20925                     |                    | cell   |
|       | 2x76D     | longPolyA    |         | Illumina_GA2x                         |                    |        |
| mouse | CSHL      | FrontalLobe  | Brain   | LID47081-LID47082                     |                    | cell   |
|       | 2x101D    | longPolyA    |         | Illumina_HiSeq_2000                   |                    |        |
| mouse | CSHL      | Ovary        | Ovary   | LID20821-LID20822                     | cell               | 2x76D  |
|       | longPolyA |              |         | Illumina_GA2x                         |                    |        |
| human | CSHL      | IMR90        | Lung    | LID45016-LID45017                     | cell               | 2x101D |
|       | longPolyA |              |         | Illumina_HiSeq_2000                   |                    |        |

**Supplementary Table S27: List of candidate mouse-specific promoters tested in reporter assay.**

|       |           | Tested in mouse    | Tested in human |
|-------|-----------|--------------------|-----------------|
| chr1  | 72282608  | 72283862 Positive  | Positive        |
| chr16 | 94534005  | 94535452 Positive  | Positive        |
| chr10 | 81640535  | 81641906 Positive  | Positive        |
| chr12 | 113931008 | 113932428 Positive | Positive        |
| chr6  | 117829050 | 117830421 Positive | Positive        |
| chr13 | 23487516  | 23488786 Positive  | Positive        |
| chr19 | 61275284  | 61276321 Positive  | Positive        |
| chr13 | 21366741  | 21367942 Positive  | Positive        |
| chr14 | 51702299  | 51703553 Positive  | Positive        |
| chr4  | 88513577  | 88514670 Positive  | Positive        |
| chr2  | 168805839 | 168807165 Negative | N/A             |
| chr4  | 154028643 | 154030048 Positive | Positive        |
| chr7  | 50508728  | 50509835 Positive  | Positive        |
| chr5  | 110514708 | 110515903 Positive | Positive        |
| chr8  | 91576369  | 91577522 Positive  | Positive        |
| chr4  | 133512988 | 133514350 Negative | N/A             |
| chr9  | 113954352 | 113955827 Positive | Positive        |
| chr8  | 28332972  | 28334480 Positive  | Positive        |
| chr18 | 13107342  | 13108338 Positive  | Positive        |
| chr10 | 126246319 | 126247564 Positive | Positive        |



**Supplementary Table 29: List of candidate mouse-specific enhancers tested in reporter assays.**

|       | start     | end       | Tested in mESC | Tested in hESC |
|-------|-----------|-----------|----------------|----------------|
| chr1  | 121295046 | 121296025 | Positive       | Positive       |
| chr11 | 9021995   | 9022995   | Negative       | Negative       |
| chr1  | 21245800  | 21246800  | Positive       | Positive       |
| chr2  | 109748850 | 109749850 | Negative       | Negative       |
| chr3  | 33905123  | 33906100  | Negative       | Negative       |
| chr3  | 107767000 | 107768000 | Positive       | Positive       |
| chr5  | 38911677  | 38912647  | Positive       | Negative       |
| chr5  | 128129750 | 128130750 | Positive       | Positive       |
| chr6  | 30147450  | 30148450  | Positive       | Positive       |
| chr6  | 49082350  | 49083350  | Positive       | Positive       |
| chr6  | 54622600  | 54623600  | Positive       | Negative       |
| chr7  | 50802475  | 50803475  | Positive       | Positive       |
| chr8  | 72536950  | 72537950  | Positive       | Negative       |
| chr9  | 99053600  | 99054600  | Positive       | Positive       |
| chr10 | 42366000  | 42367000  | Negative       | Negative       |
| chr12 | 77310200  | 77311200  | Positive       | Negative       |
| chrX  | 73843900  | 73844900  | Negative       | Negative       |
| chr16 | 48303488  | 48304467  | Positive       | Negative       |
| chr17 | 41036531  | 41037557  | Negative       | Negative       |
| chr8  | 97710983  | 97711993  | Negative       | Negative       |
| chr2  | 147118424 | 147119401 | Negative       | Positive       |
| chr5  | 53301450  | 53302370  | Positive       | Negative       |
| chr18 | 25547503  | 25548453  | Positive       | Positive       |
| chr1  | 3472699   | 3473648   | Negative       | Negative       |
| chr2  | 31995916  | 31996896  | Positive       | Positive       |
| chr13 | 86237126  | 86238080  | Positive       | Negative       |
| chr3  | 107798742 | 107799702 | Positive       | Positive       |
| chr8  | 58730595  | 58731581  | Positive       | Negative       |
| chr13 | 16921782  | 16922764  | Positive       | Negative       |
| chr16 | 56901932  | 56902893  | Positive       | Negative       |
| chr1  | 17921912  | 17922867  | Positive       | Positive       |
| chr6  | 68802399  | 68803383  | Positive       | Positive       |
| chr2  | 36270509  | 36271461  | Negative       | Negative       |
| chr9  | 9268943   | 9269894   | Positive       | Positive       |
| chr1  | 142084819 | 142085770 | Negative       | Negative       |
| chr12 | 4358406   | 4359368   | Positive       | Positive       |
| chr1  | 84886510  | 84887461  | Positive       | Positive       |
